# Supplementary material for: Synthesis of the Indole-Based Inhibitors of Bacterial Cystathionine γ-Lyase NL1-NL3
Source: MDPI journal article supplement (doi:10.3390/molecules28083568), 2023-04-19

## Synthesis of the Indole-Based Inhibitors of Bacterial Cystathionine $\gamma$ -Lyase NL1-NL3

Konstantin V. Potapov<sup>2,1,#</sup>, Roman A. Novikov<sup>1,2,3,#,\*</sup>, Maxim A. Novikov<sup>2,#</sup>, Pavel N. Solyev<sup>1,#,\*</sup>, Yury V. Tomilov<sup>2,\*</sup>, Sergey N. Kochetkov<sup>1</sup>, Alexander A. Makarov<sup>1</sup>, Vladimir A. Mitkevich<sup>1</sup>

<sup>1</sup> Engelhardt Institute of Molecular Biology of the Russian Academy of Sciences, 32 Vavilov St., Moscow 119991, Russia; kospotapov@yandex.ru (K.V.P.); novikovfff@bk.ru (R.A.N.); solyev@gmail.com (P.N.S.), kochet@eimb.ru (S.N.K.); aamakov@eimb.ru (A.A.M.); mitkevich@gmail.com (V.A.M.);

<sup>2</sup> Zelinsky Institute of Organic Chemistry of the Russian Academy of Sciences, 47 Leninsky avenue, 119991 Moscow, Russia; kospotapov@yandex.ru (K.V.P.); manovikov@ioc.ac.ru (M.A.N.); novikovfff@bk.ru (R.A.N.); tom@ioc.ac.ru (Y.V.T.);

<sup>3</sup> Biotechnology Department, Sirius University of Science and Technology, 1 Olympic Avenue, 354349, Sirius, Russia; novikovfff@bk.ru (R.A.N.);

\* Correspondence: solyev@gmail.com (P.N.S.); Tel.: +7-499-135-60-65; novikovfff@bk.ru (R.A.N.); tom@ioc.ac.ru (Y.V.T.); Tel.: +7-499-135-63-90.

# K.V.P., M.A.N., R.A.N., P.N.S. contributed equally to this work.

### Experimental section

[1. General details](#) .....S2

[2. NMR spectral data for compounds](#).....S3

## 1.1. General experimental details

$^1\text{H}$ ,  $^{13}\text{C}$  NMR spectra were recorded on a Bruker AVANCE II 300 MHz (300.1, 75.5 MHz and 282.4 MHz respectively) and a Bruker AMX III 400 MHz (400.1, 100.6 MHz and 376.5 MHz respectively) spectrometers in  $\text{CDCl}_3$ , containing 0.05%  $\text{Me}_4\text{Si}$  as the internal standard. Determination and verification of structures obtained compounds and assignments of  $^1\text{H}$  and  $^{13}\text{C}$  signals were made with the aid of 1D and 2D DEPT, COSY, HSQC and HMBC spectra.

## 4. NMR spectral data for compounds

$^1\text{H}$  NMR (300 MHz) in  $\text{CDCl}_3$

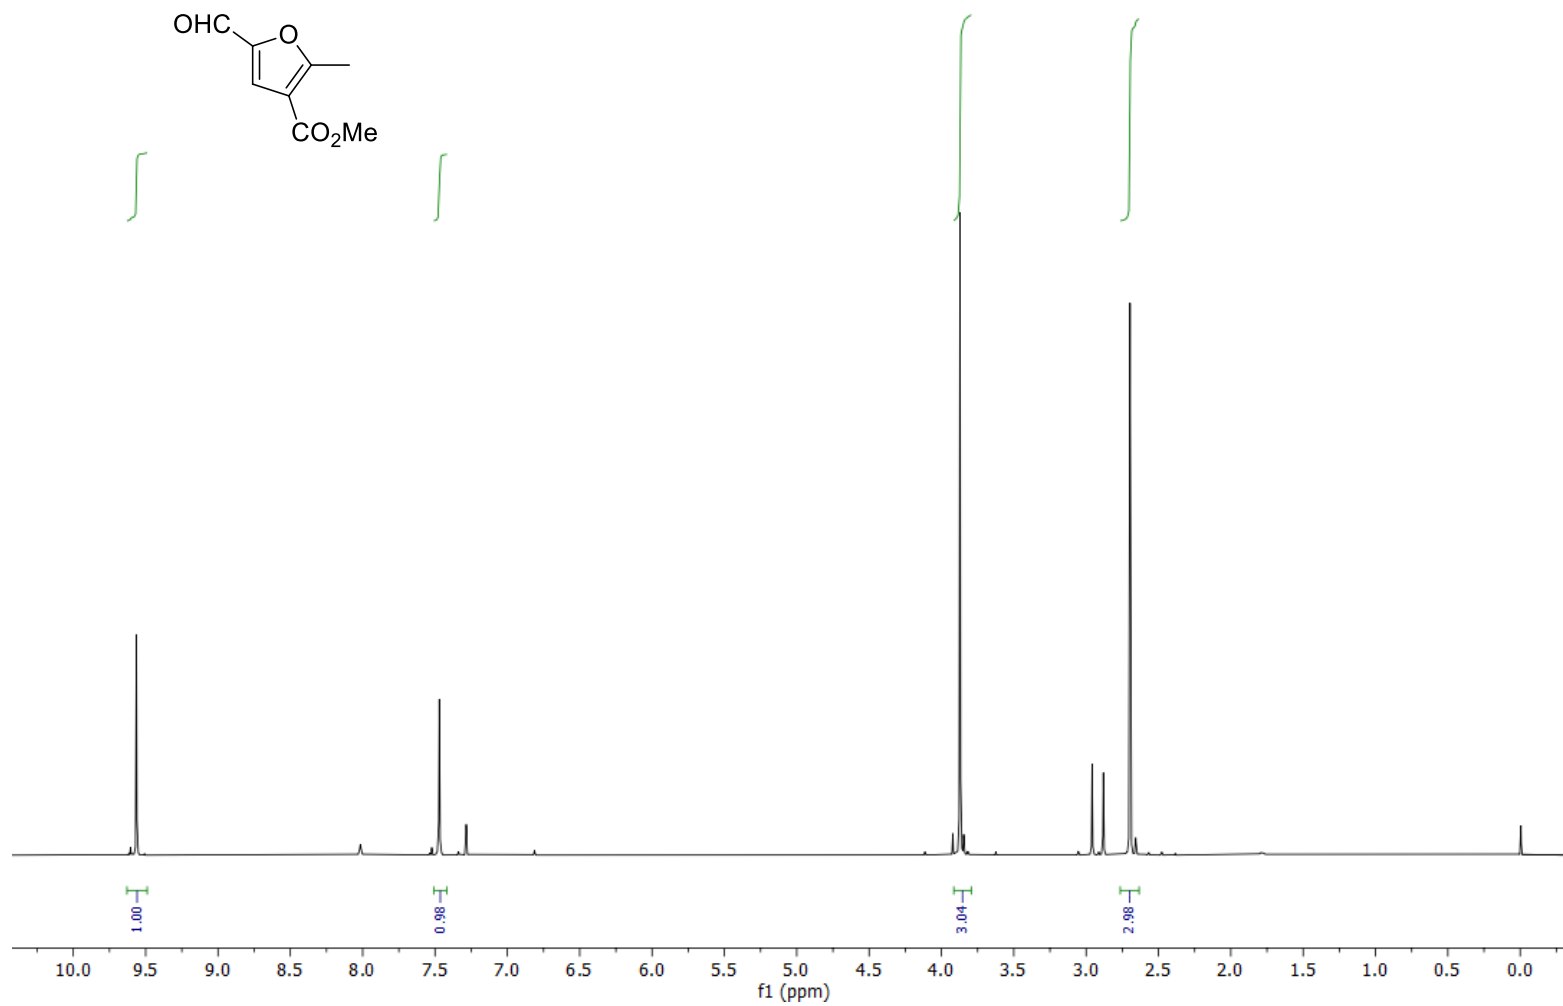

$^1\text{H}$  NMR (300 MHz) in  $\text{CDCl}_3$

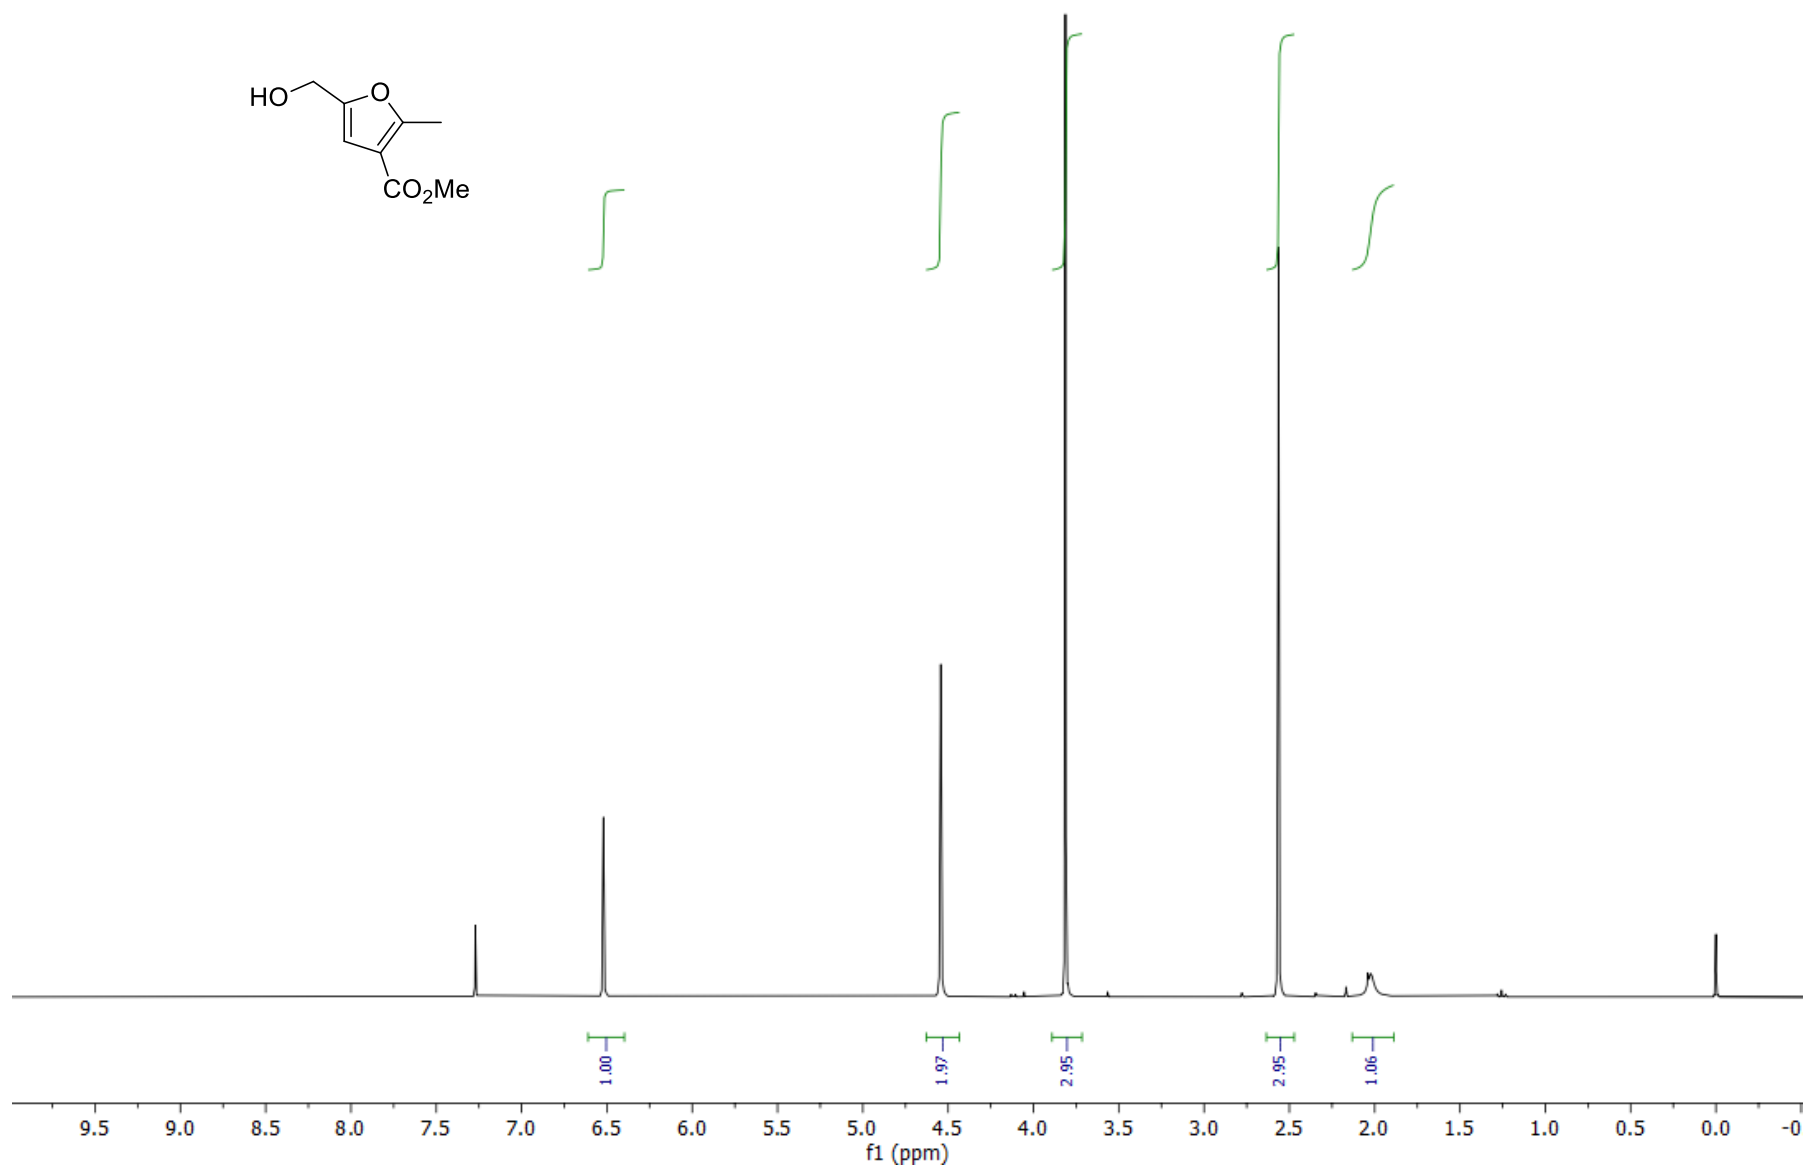

$^{13}\text{C}$  NMR (76 MHz) in  $\text{CDCl}_3$

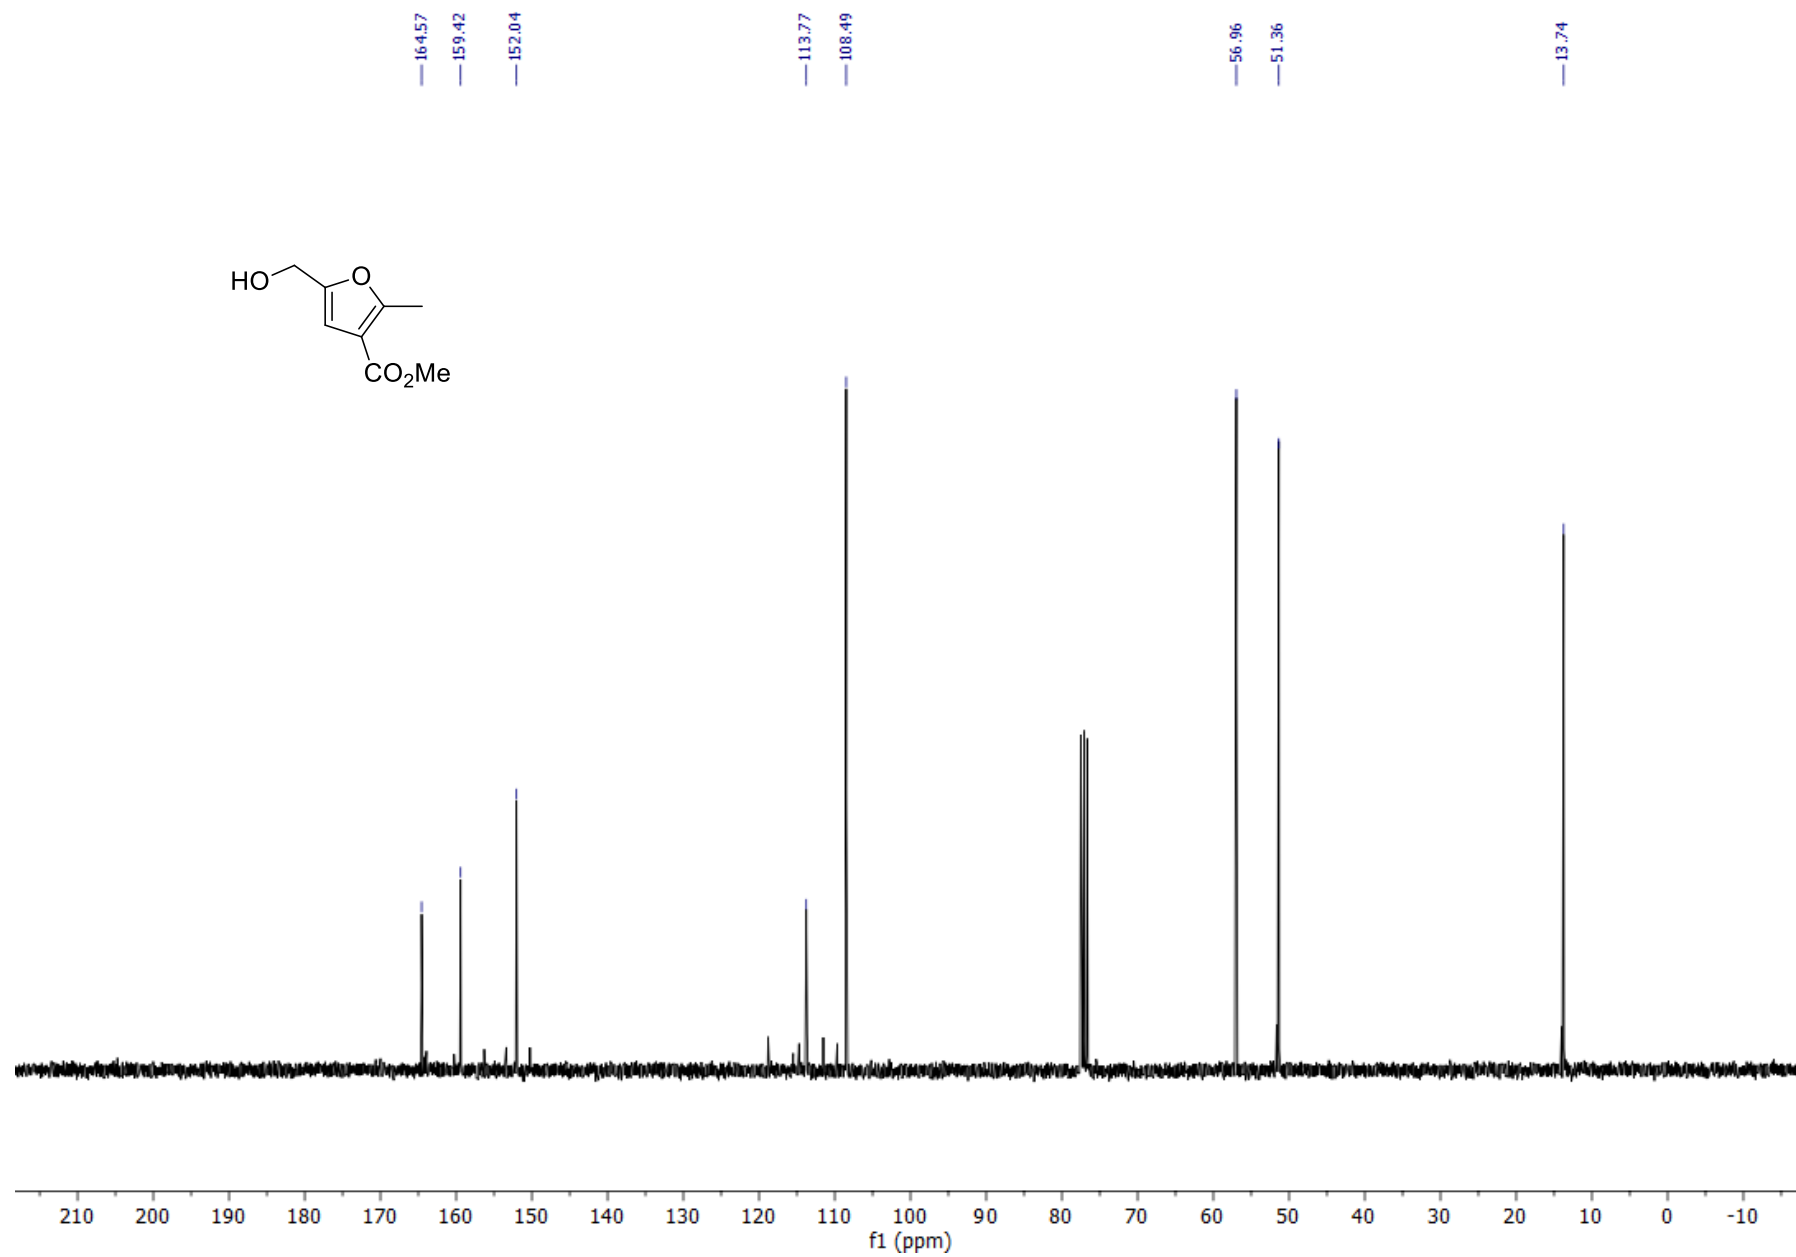

$^1\text{H}$  NMR (300 MHz) in  $\text{CDCl}_3$

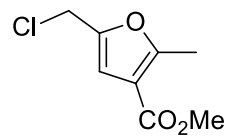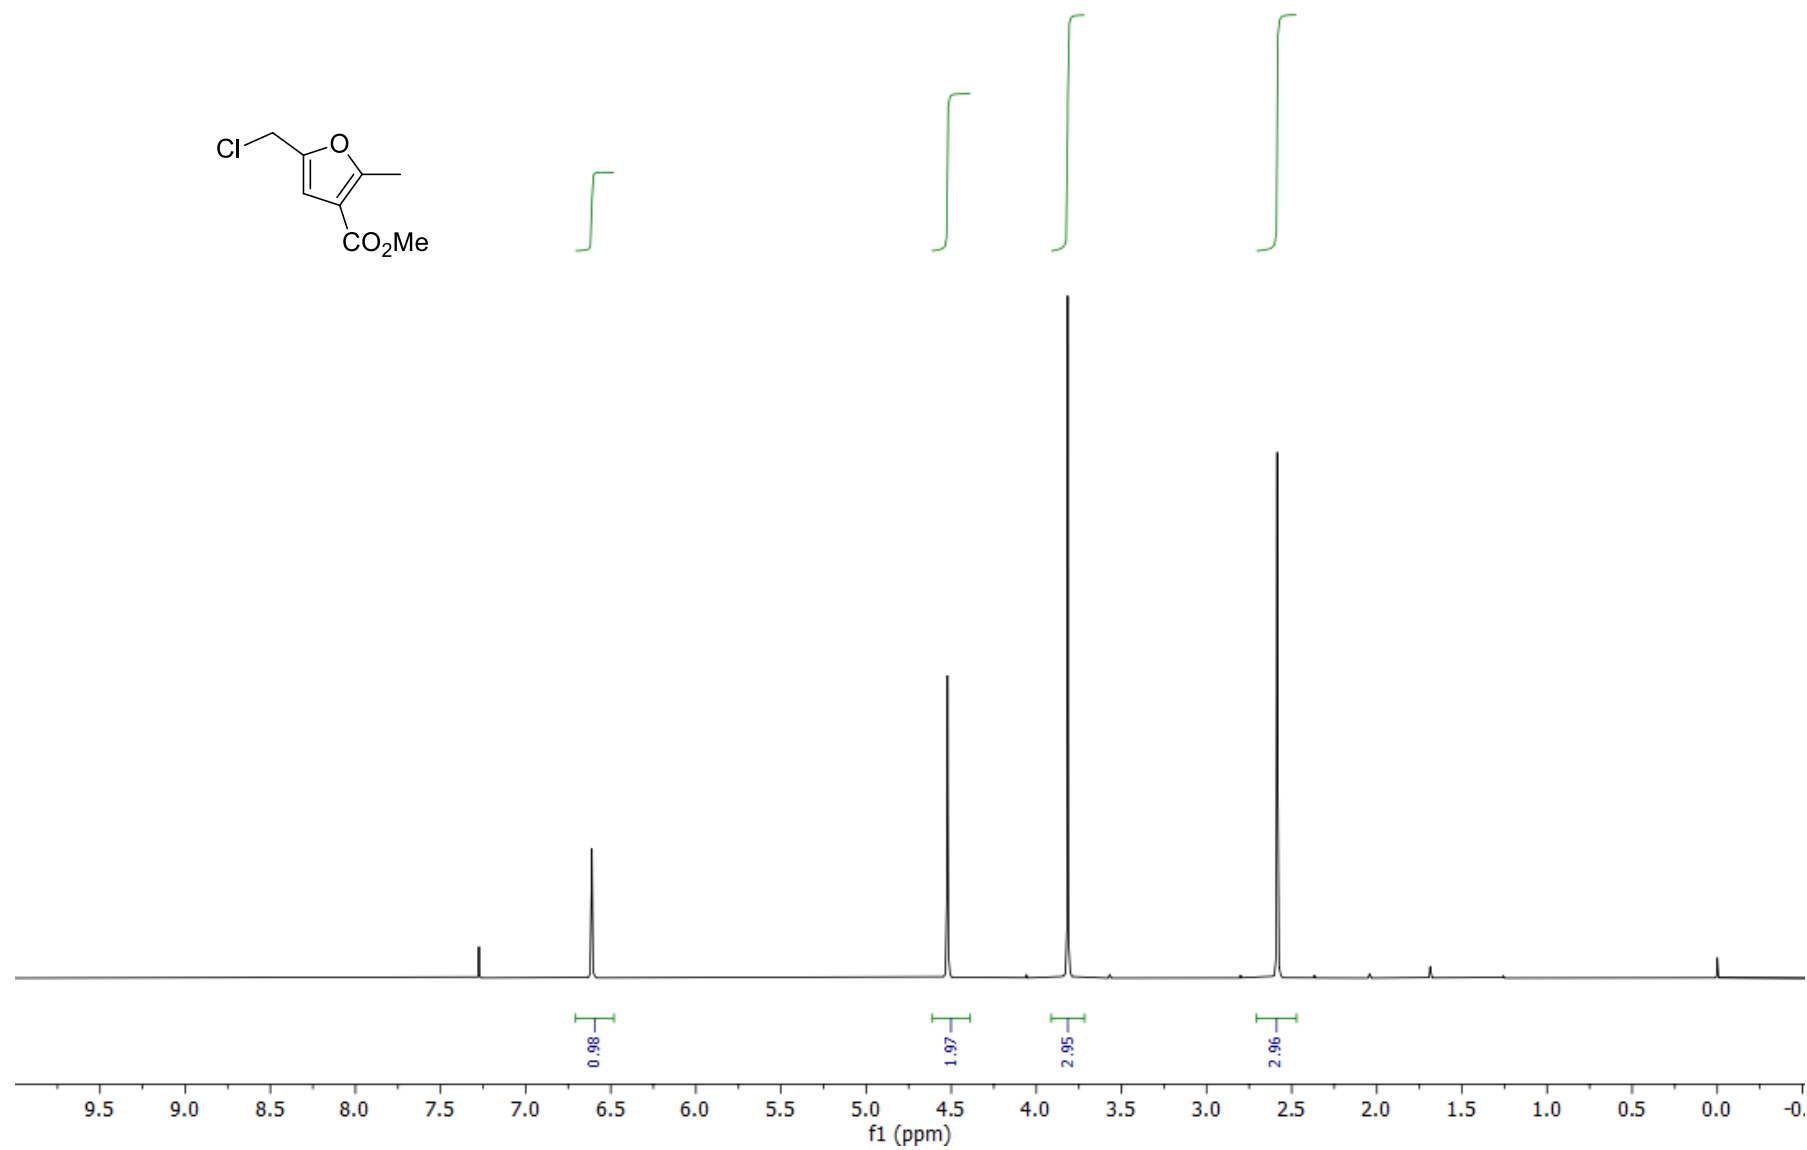

$^{13}\text{C}$  NMR (76 MHz) in  $\text{CDCl}_3$

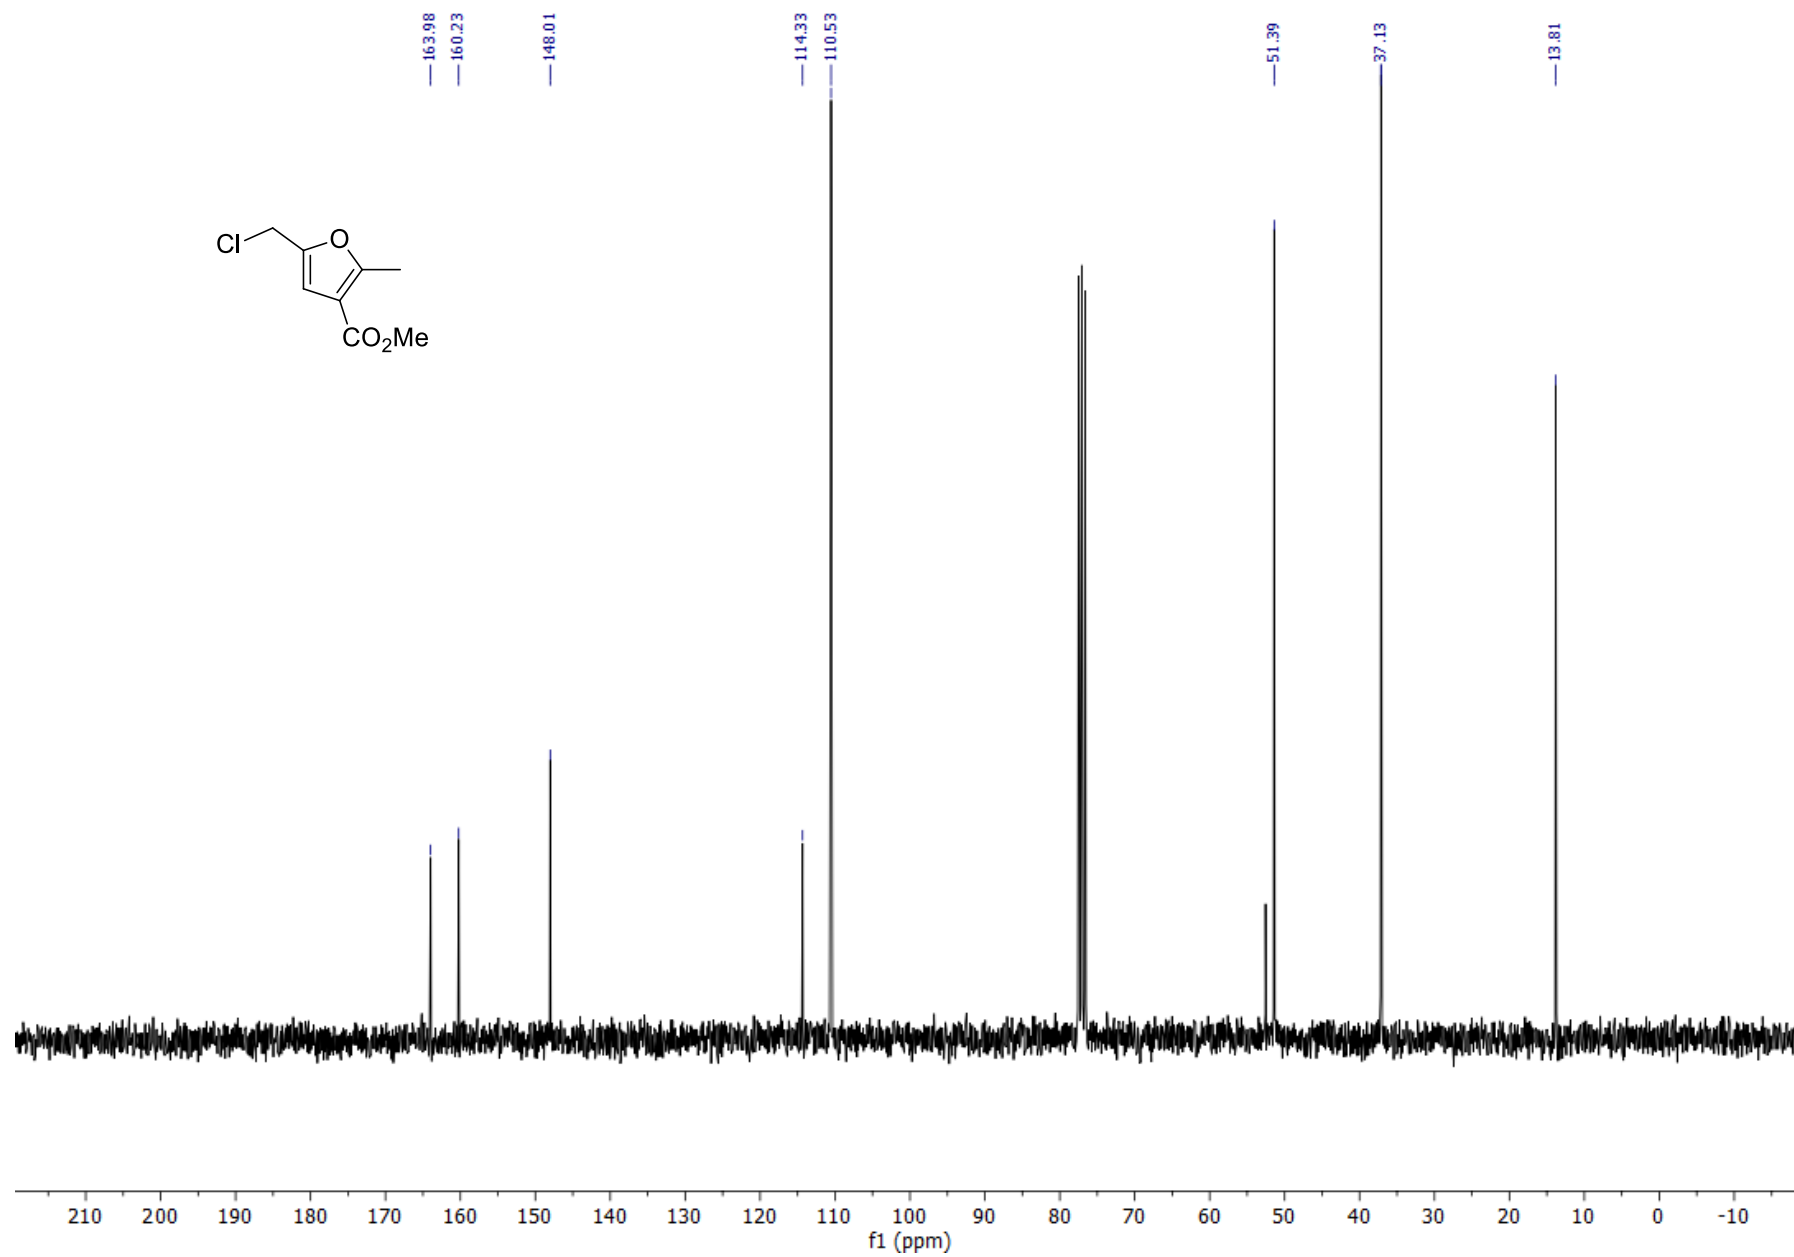

$^1\text{H}$  NMR (300 MHz) in  $\text{CDCl}_3$

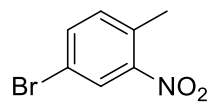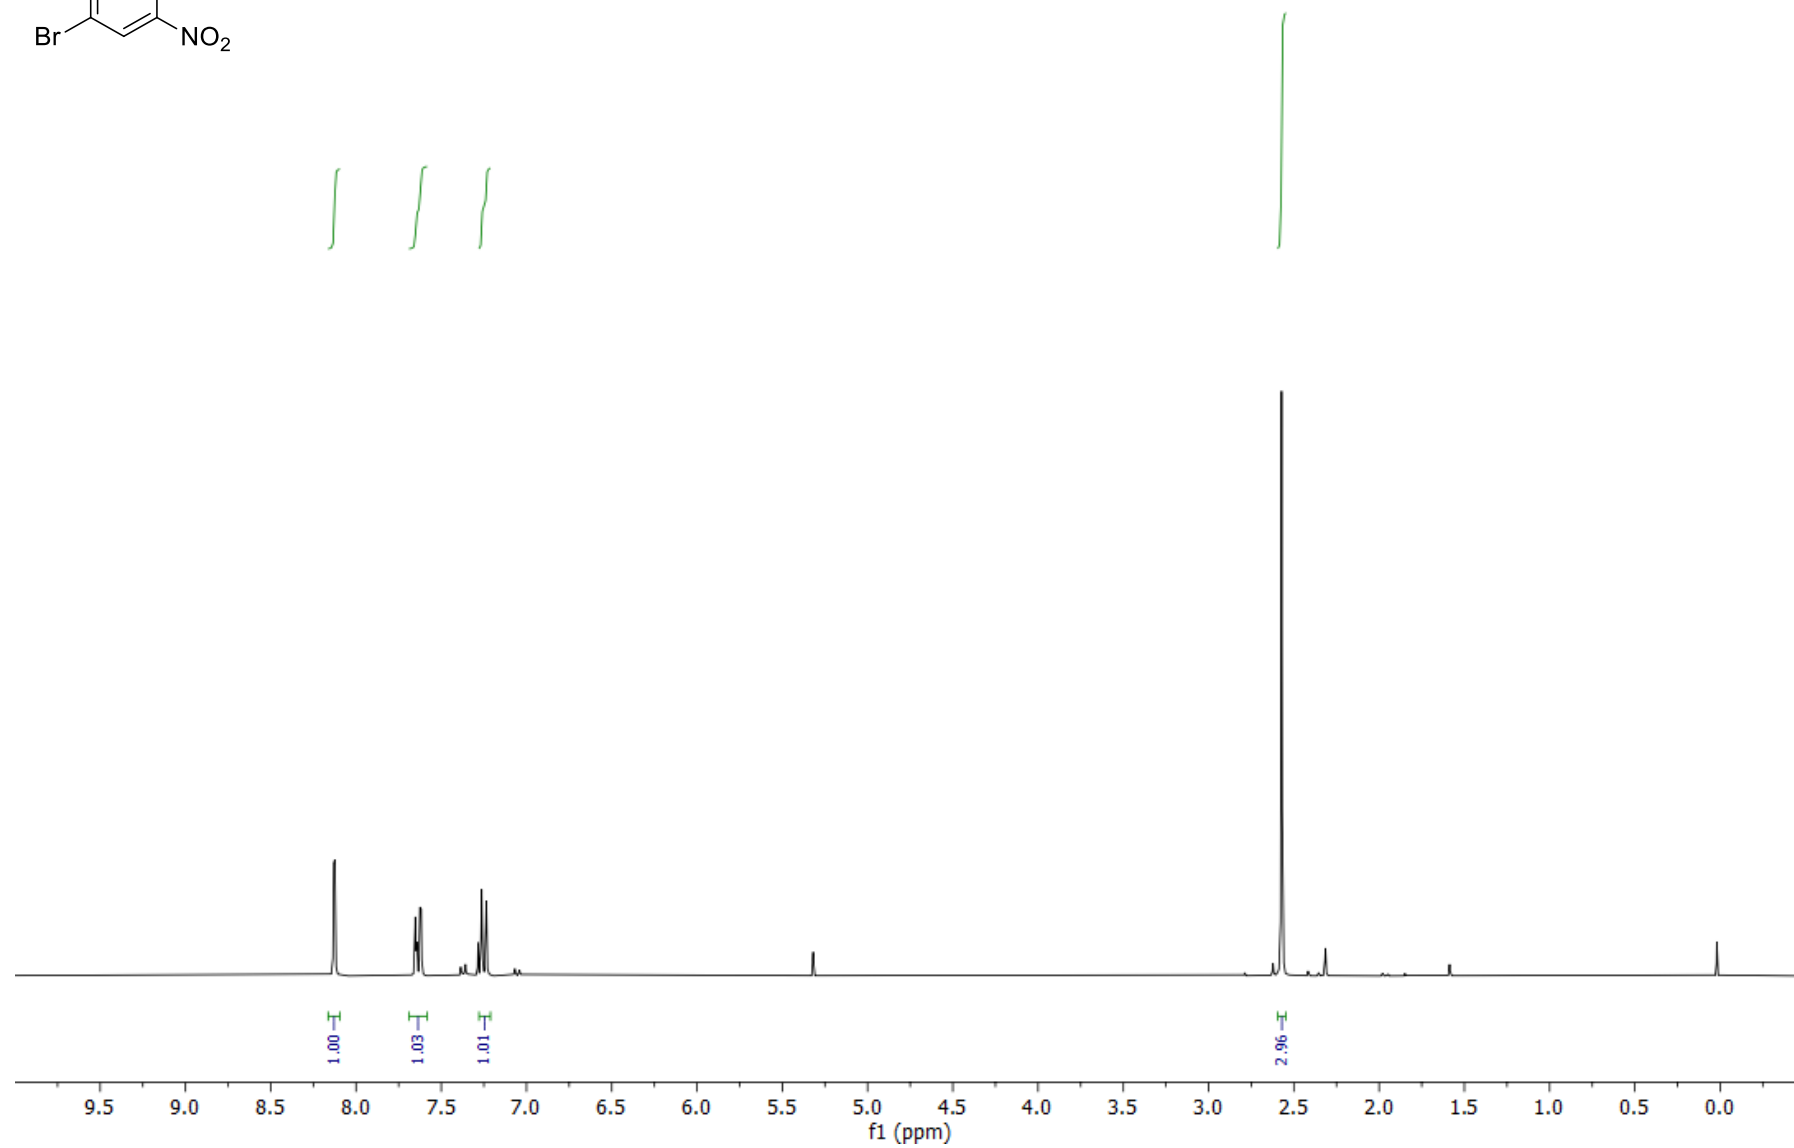



$^{13}\text{C}$  NMR (76 MHz) in  $\text{CDCl}_3$

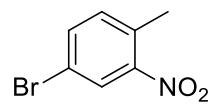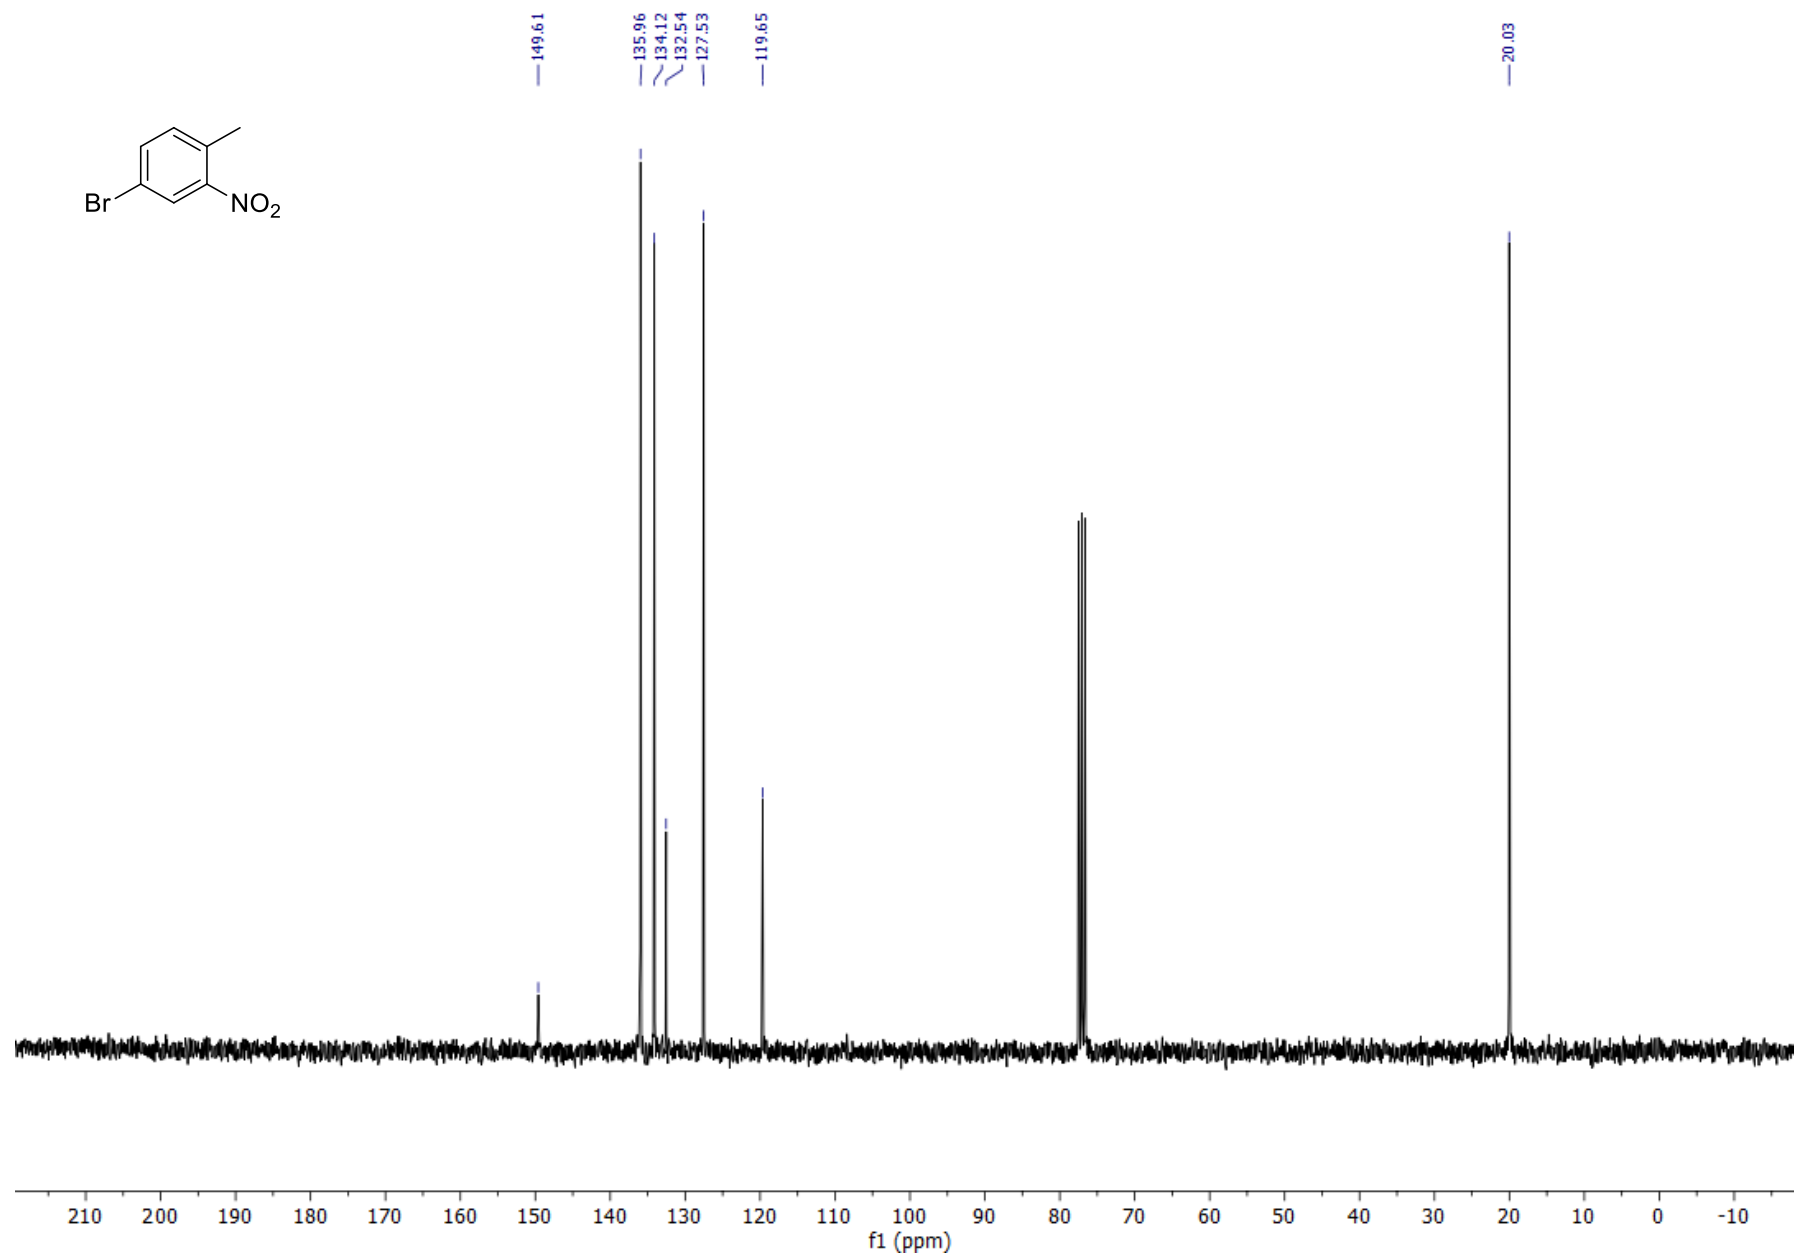

$^1\text{H}$  NMR (300 MHz) in  $\text{CDCl}_3$

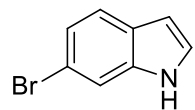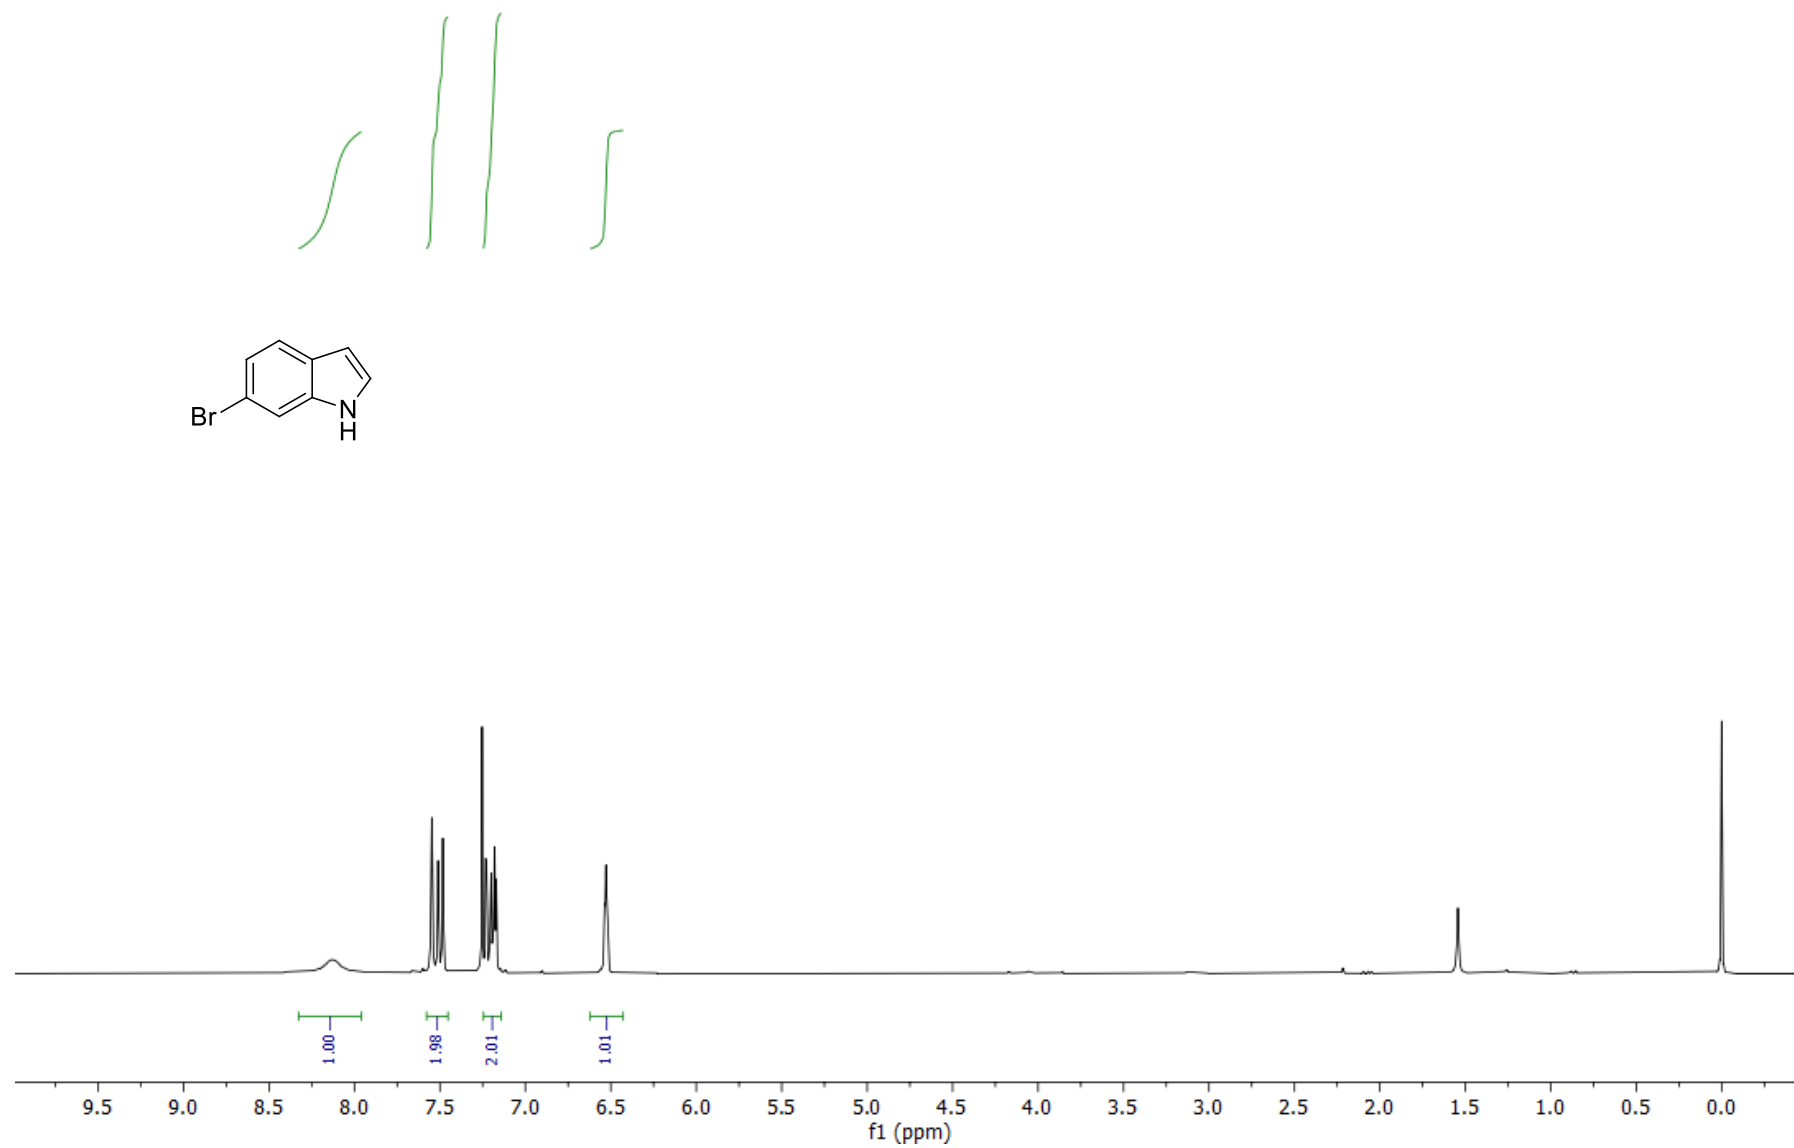

$^{13}\text{C}$  NMR (76 MHz) in  $\text{CDCl}_3$

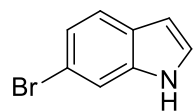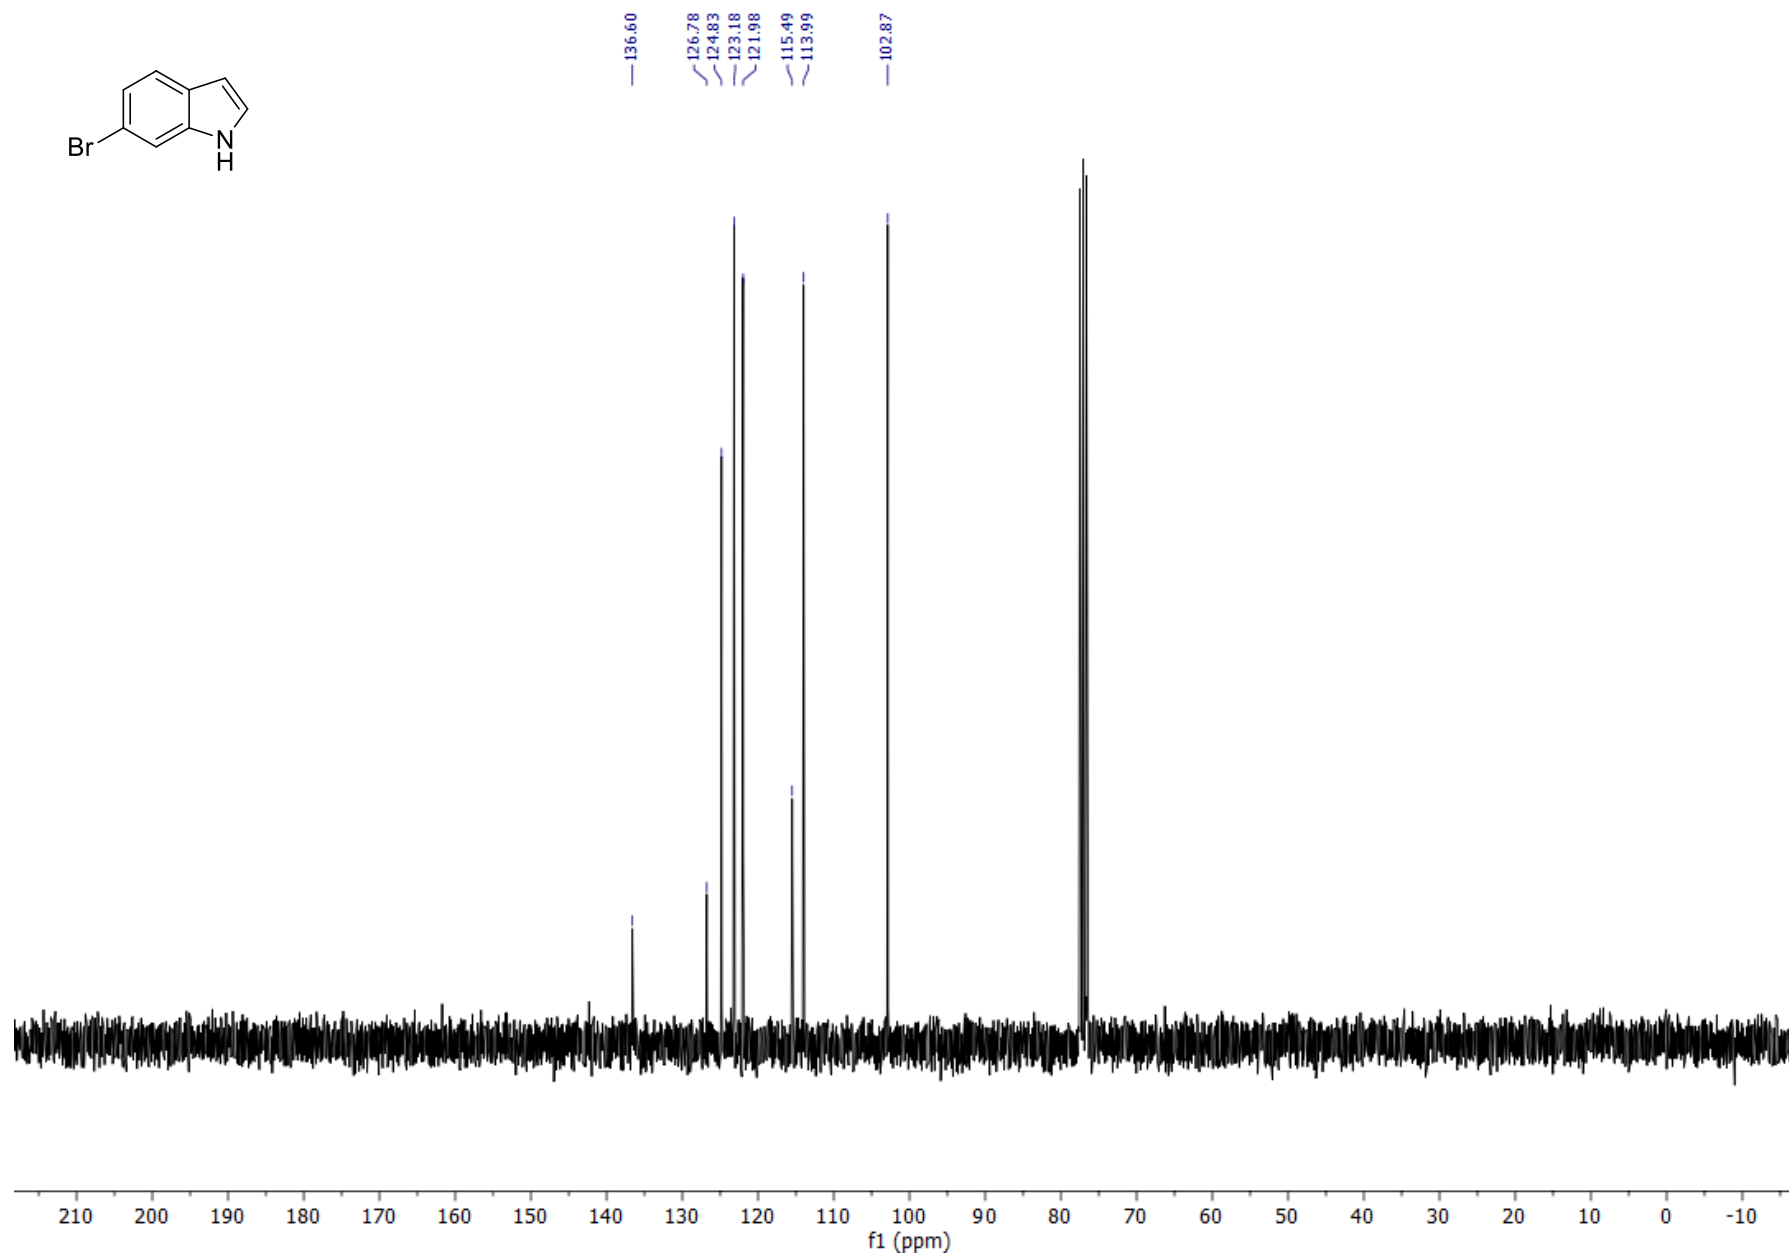

$^1\text{H}$  NMR (300 MHz) in  $\text{CDCl}_3$

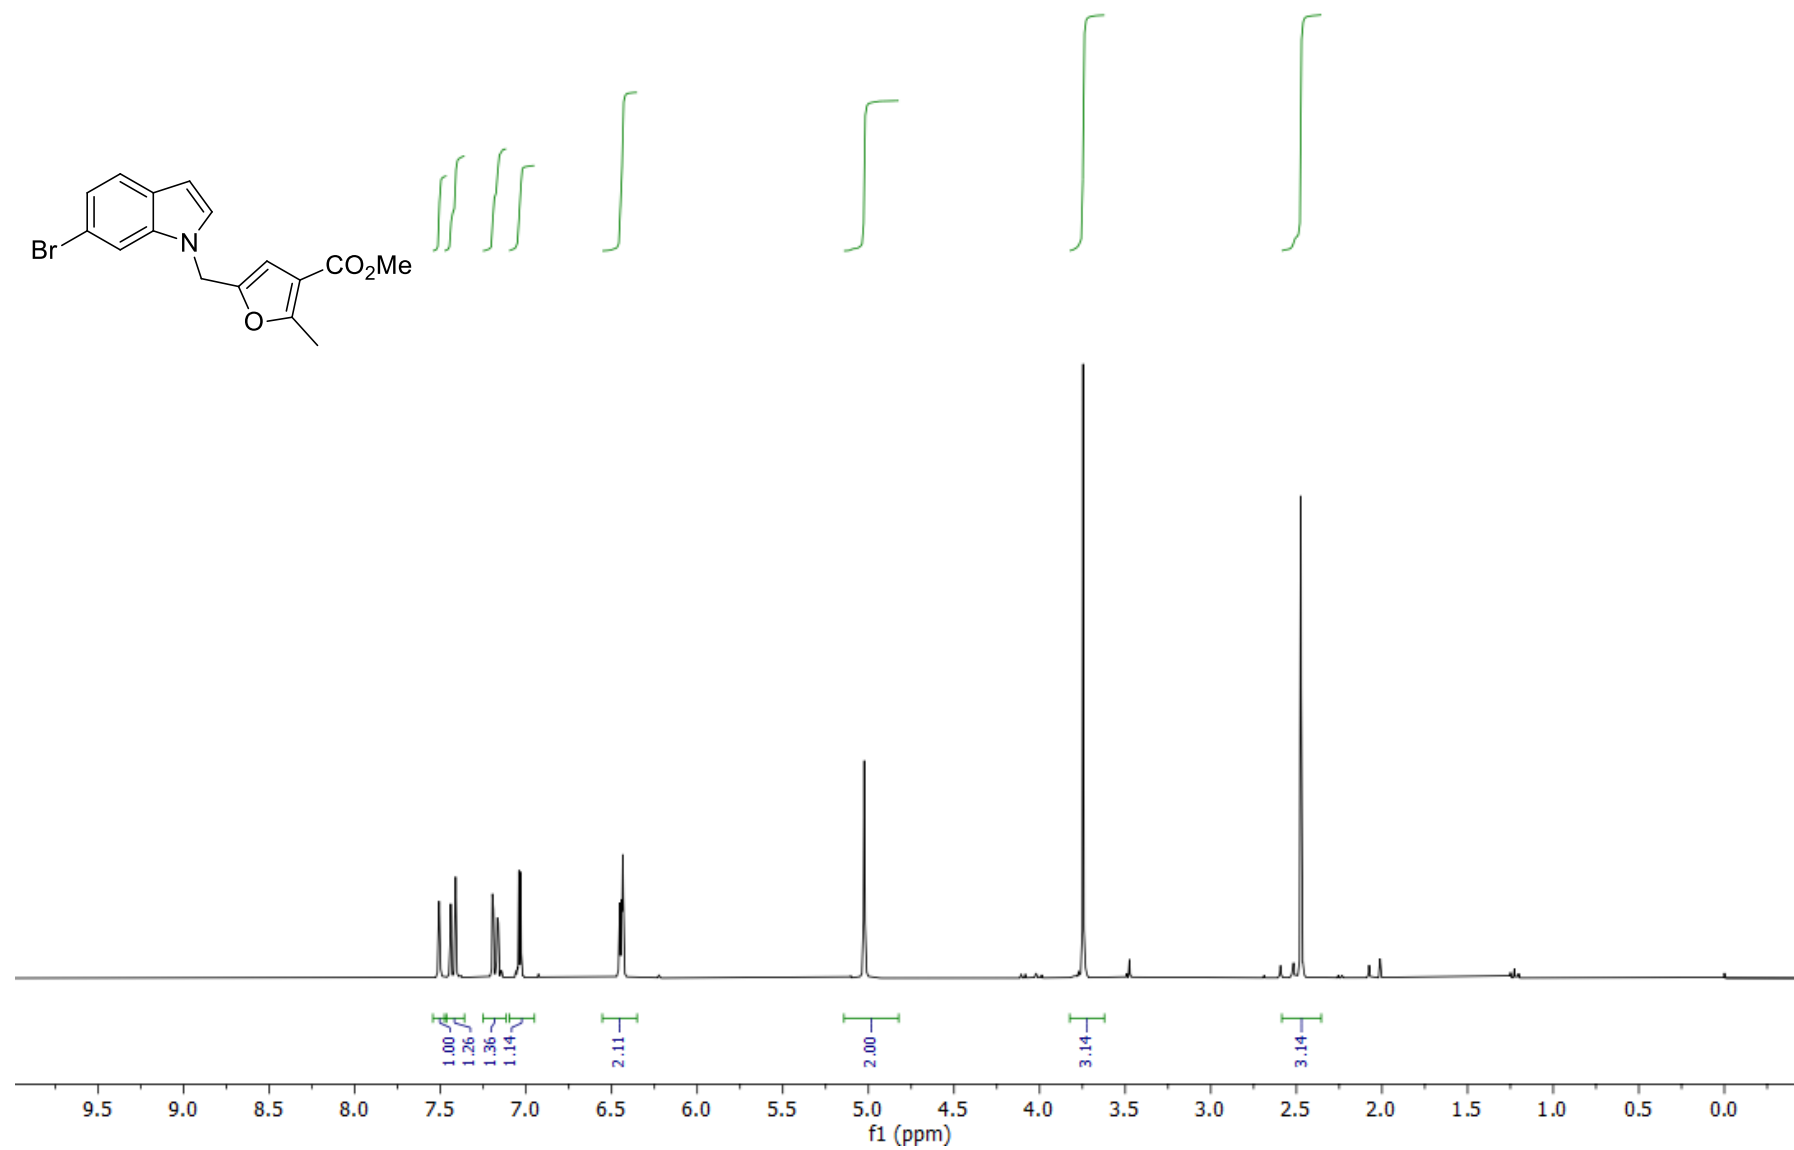

$^{13}\text{C}$  NMR (76 MHz) in  $\text{CDCl}_3$

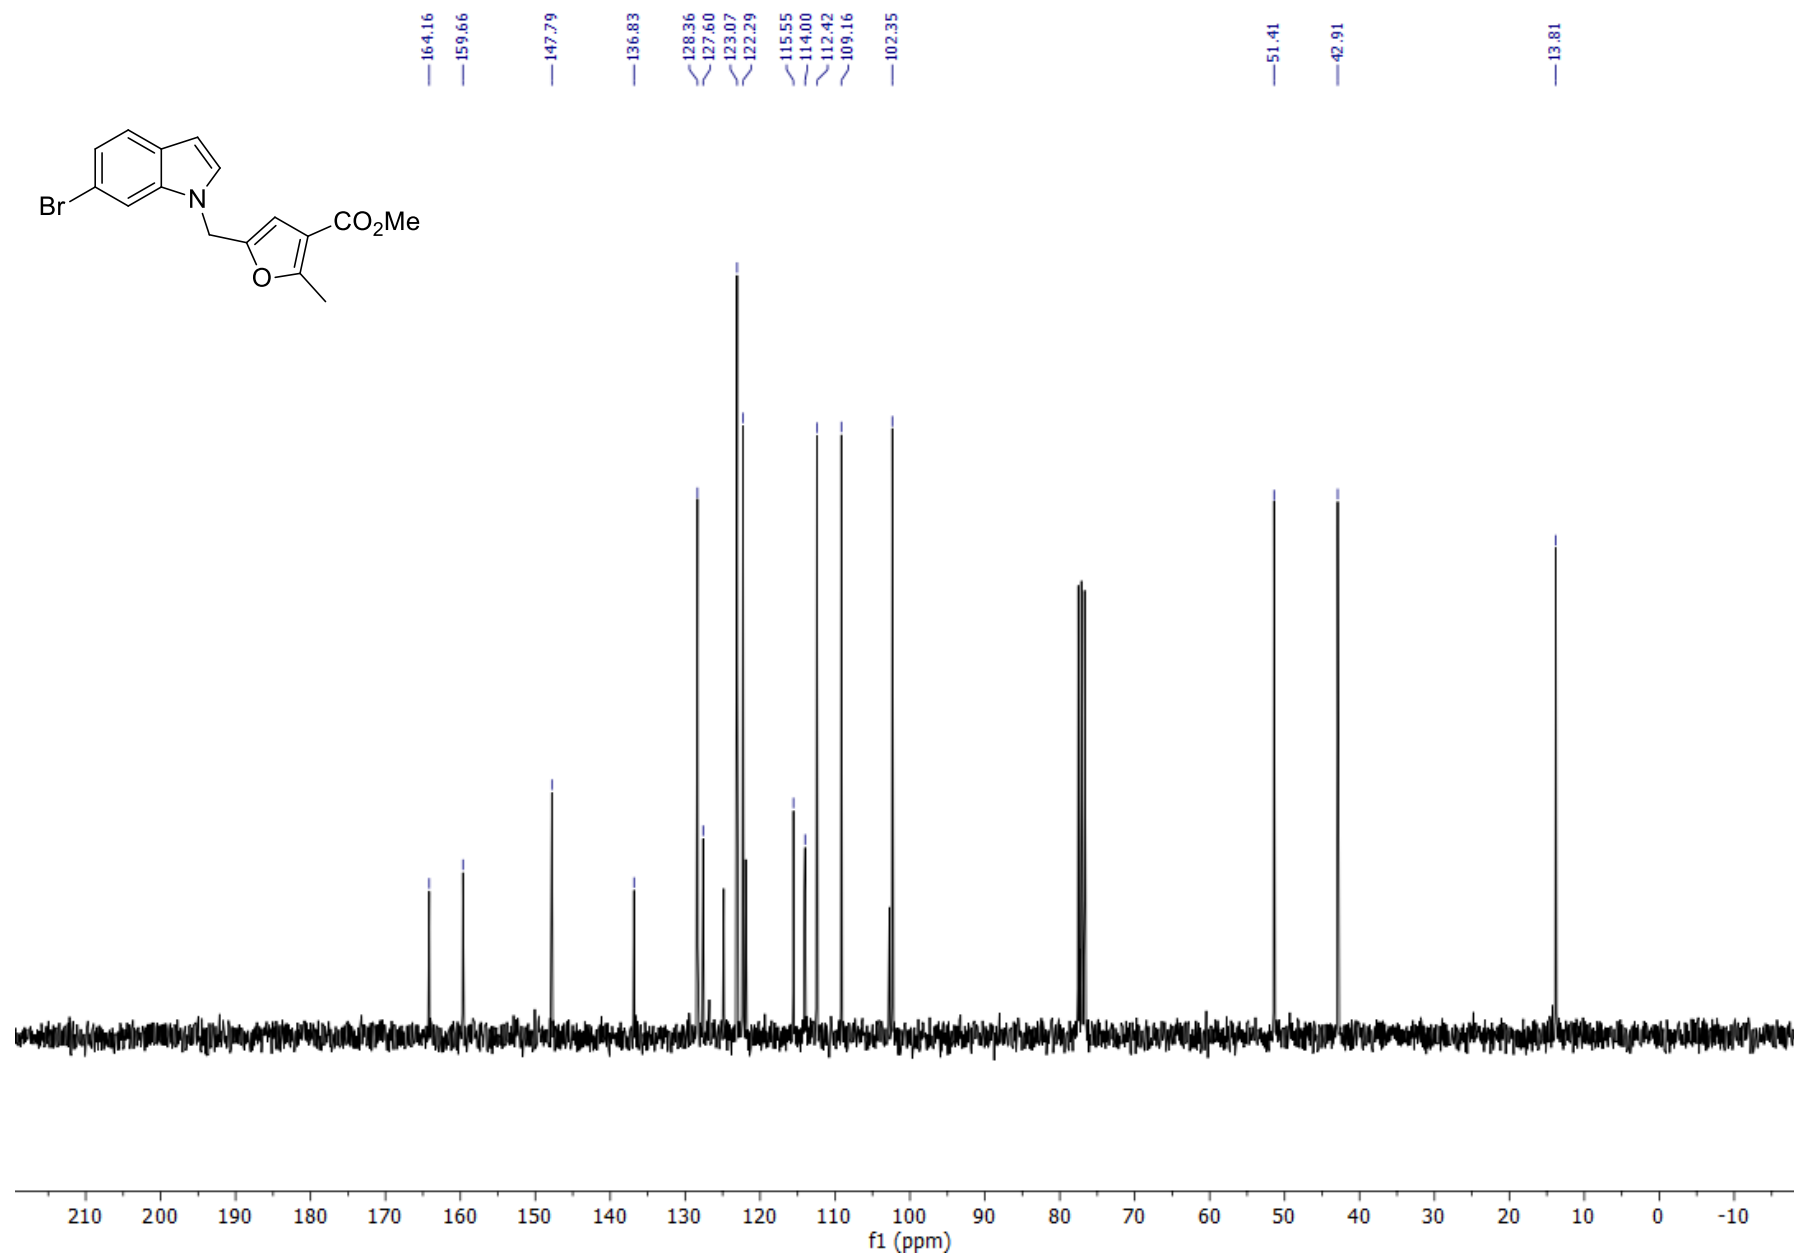

$^1\text{H}$  NMR (400 MHz) in  $\text{CDCl}_3$

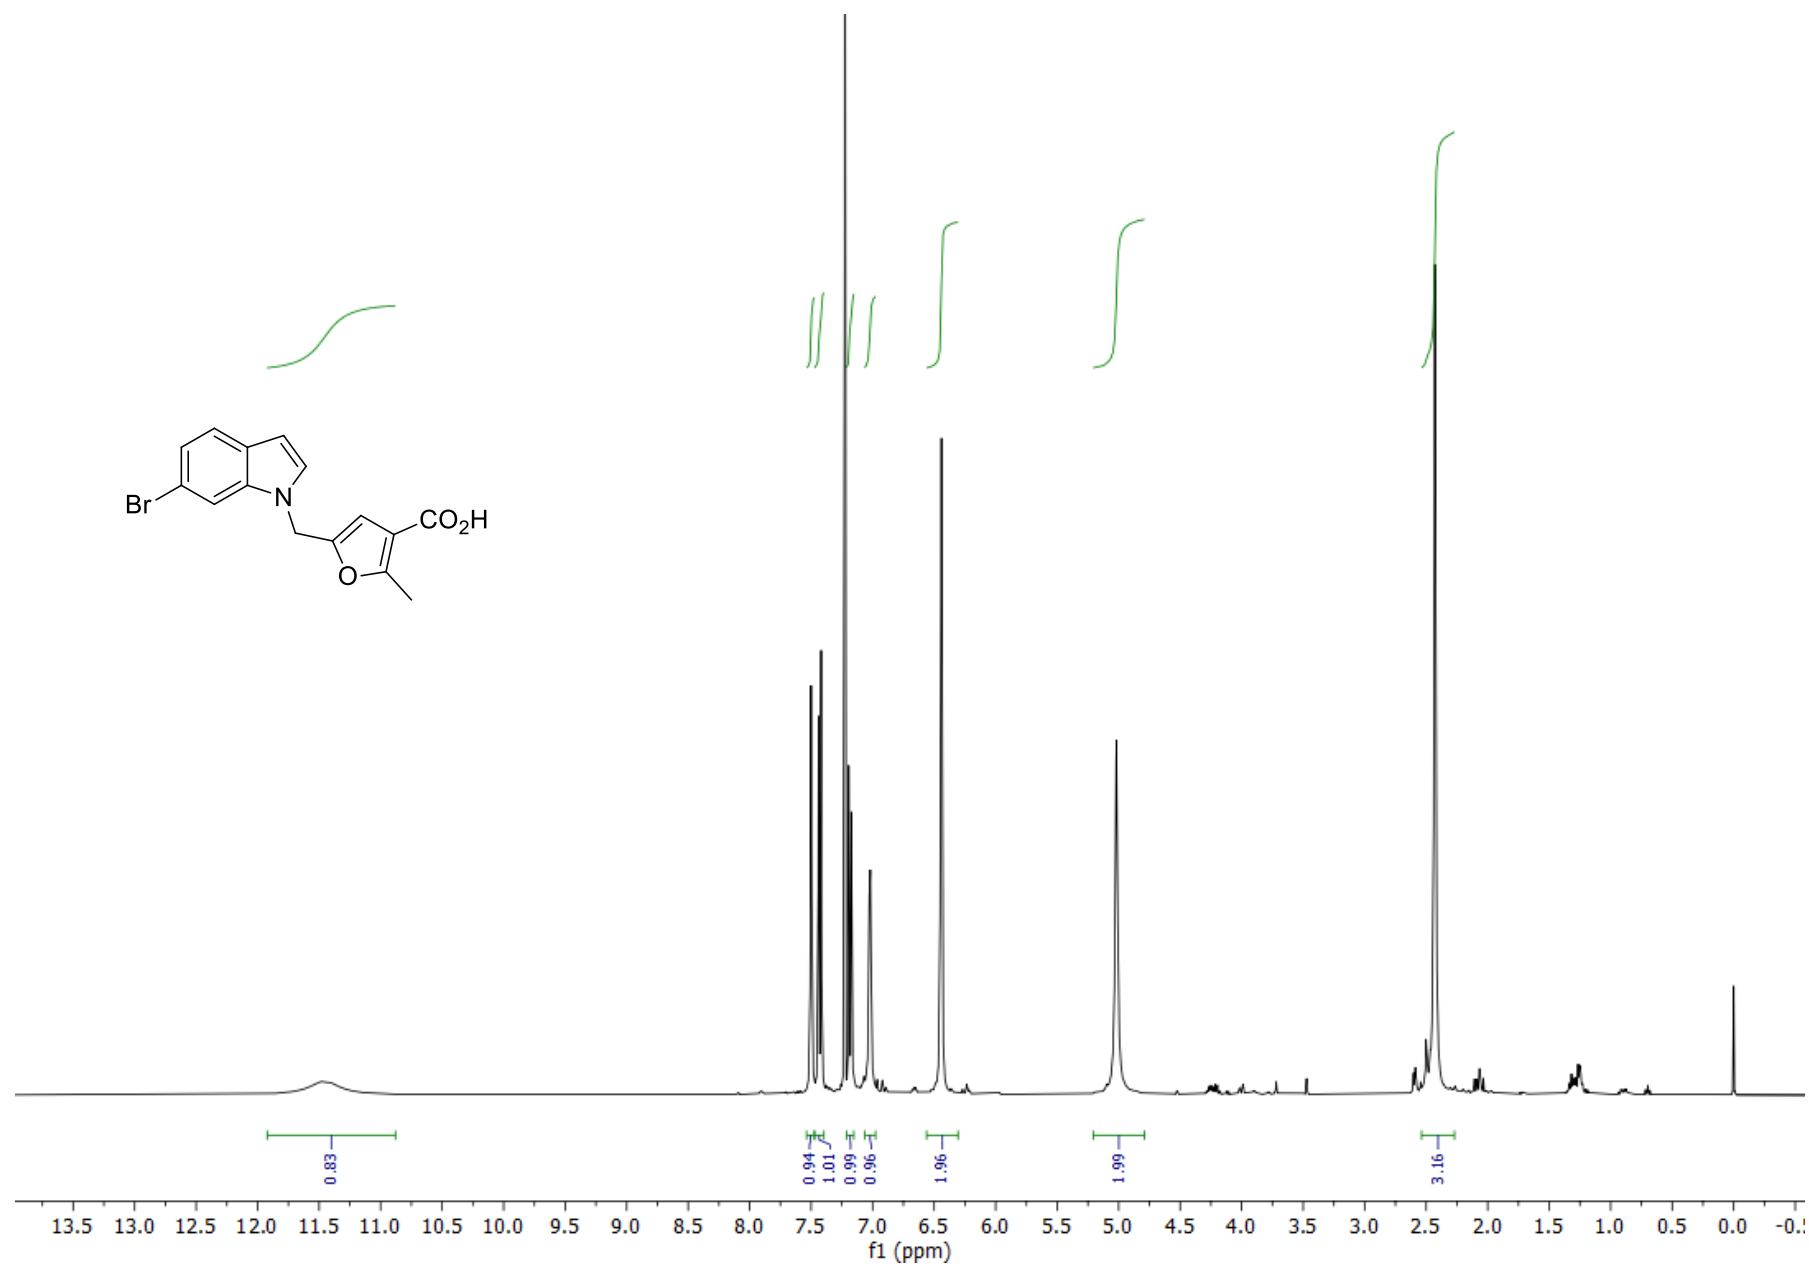

$^{13}\text{C}$  NMR (101 MHz) in  $\text{CDCl}_3$

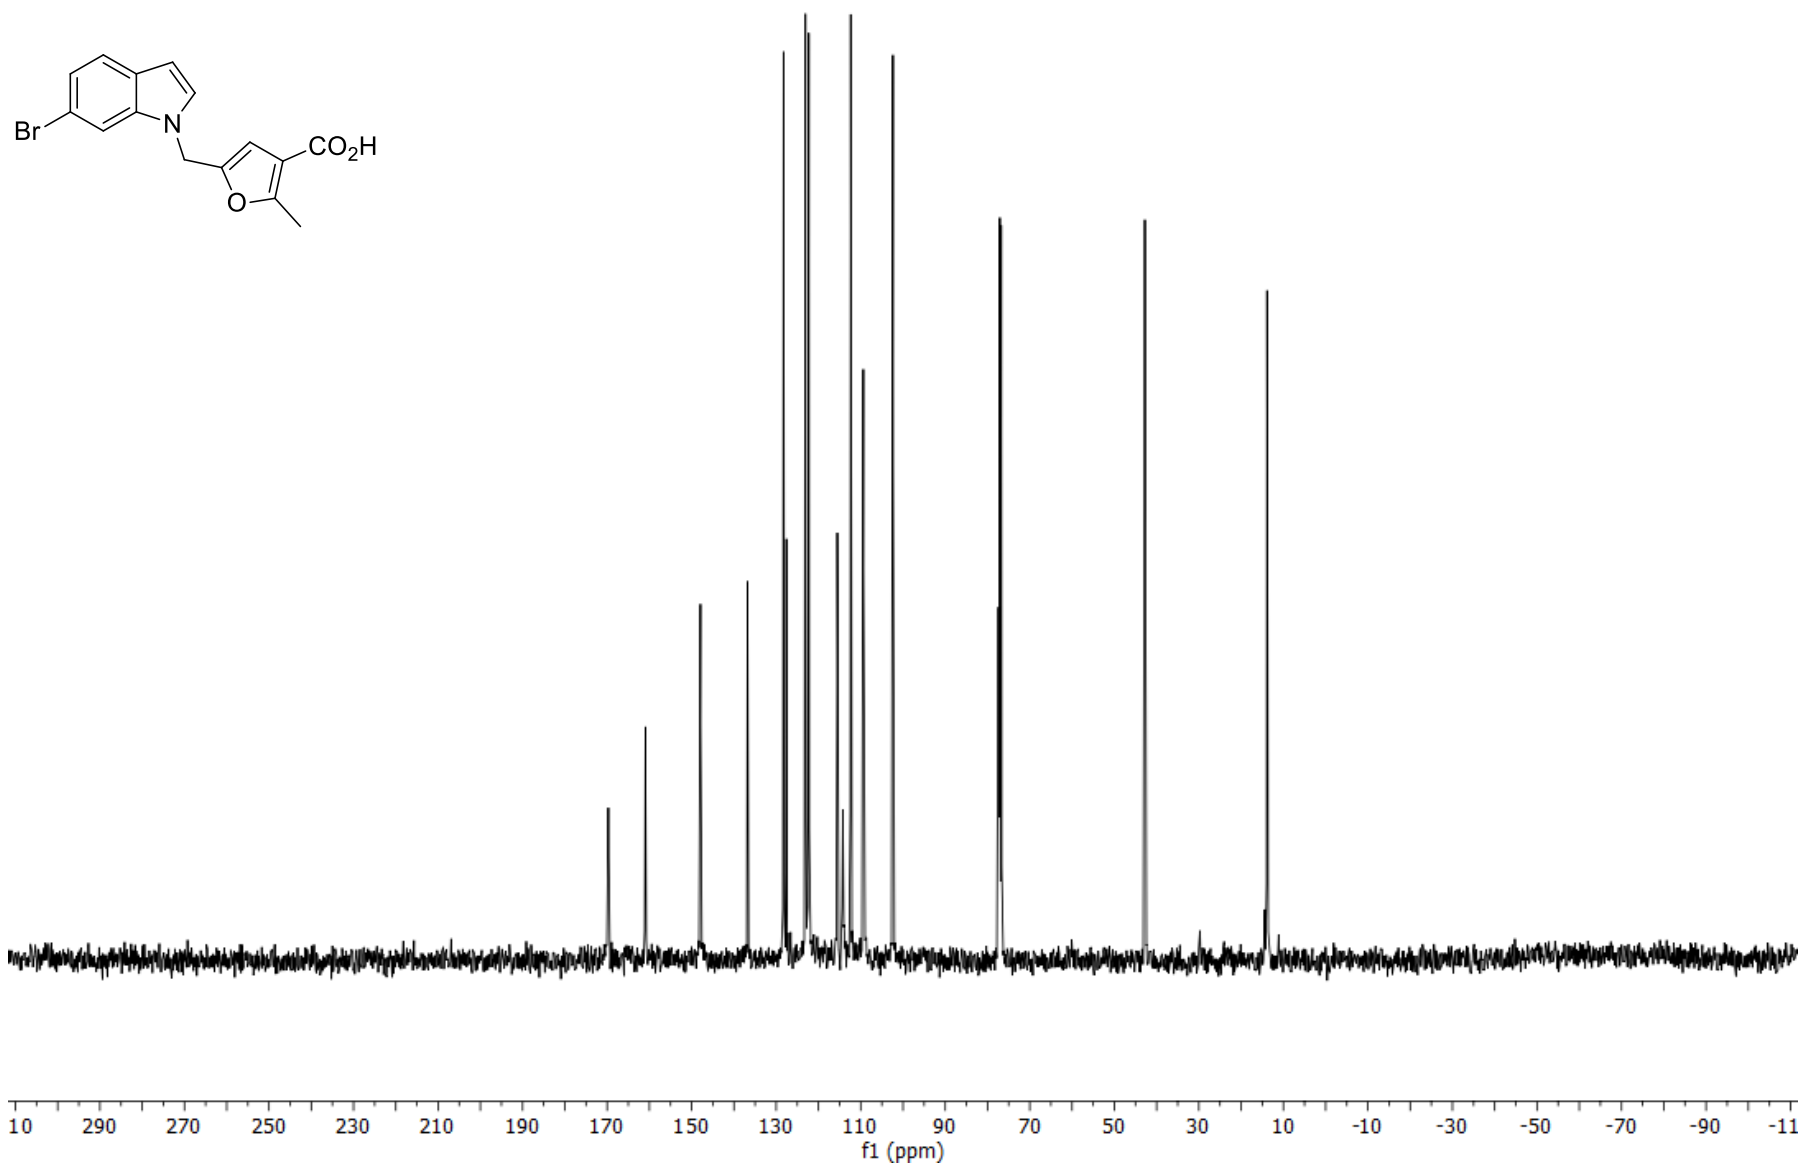

{<sup>13</sup>C}depts135 NMR (101 MHz) in CDCl<sub>3</sub>

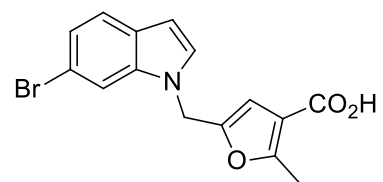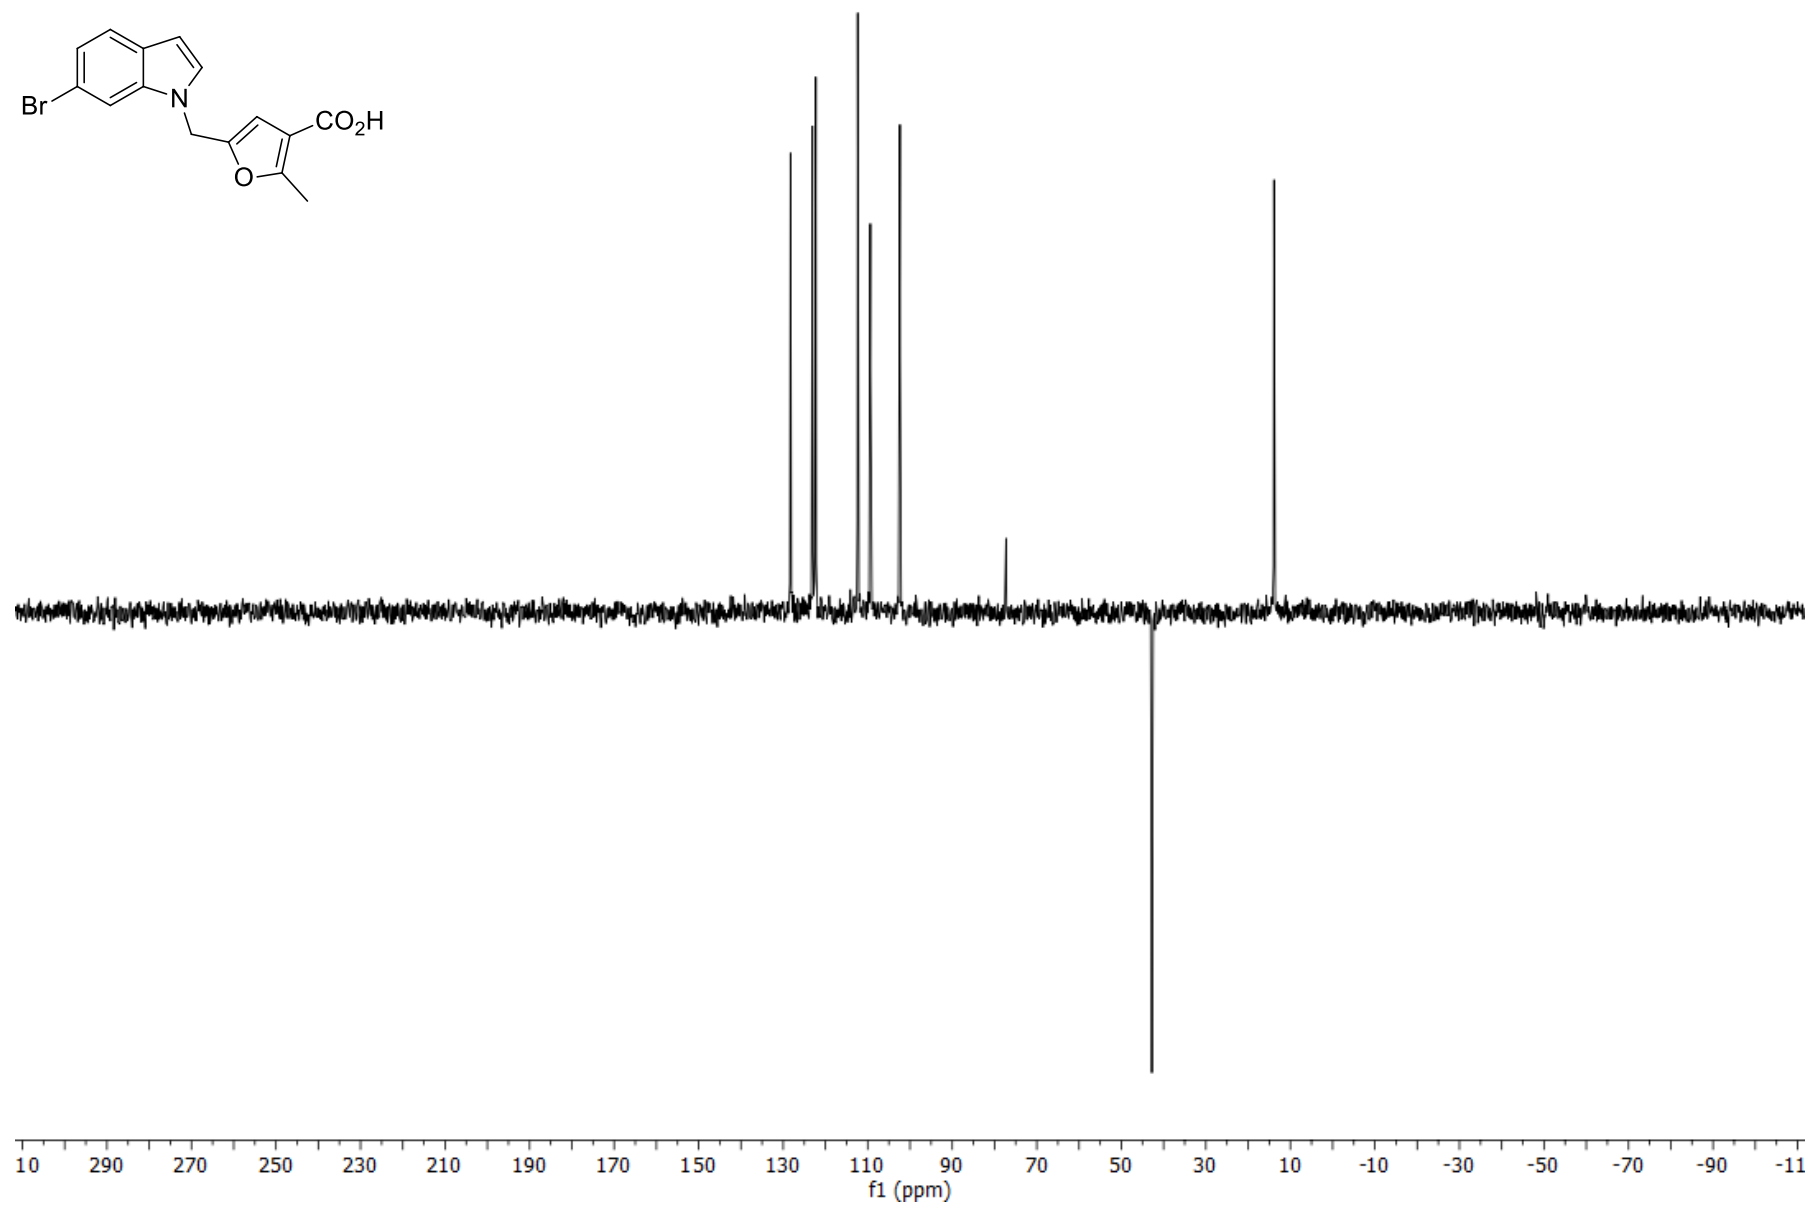



$^1\text{H}, ^1\text{H}$ -COSY (400 MHz) in  $\text{CDCl}_3$

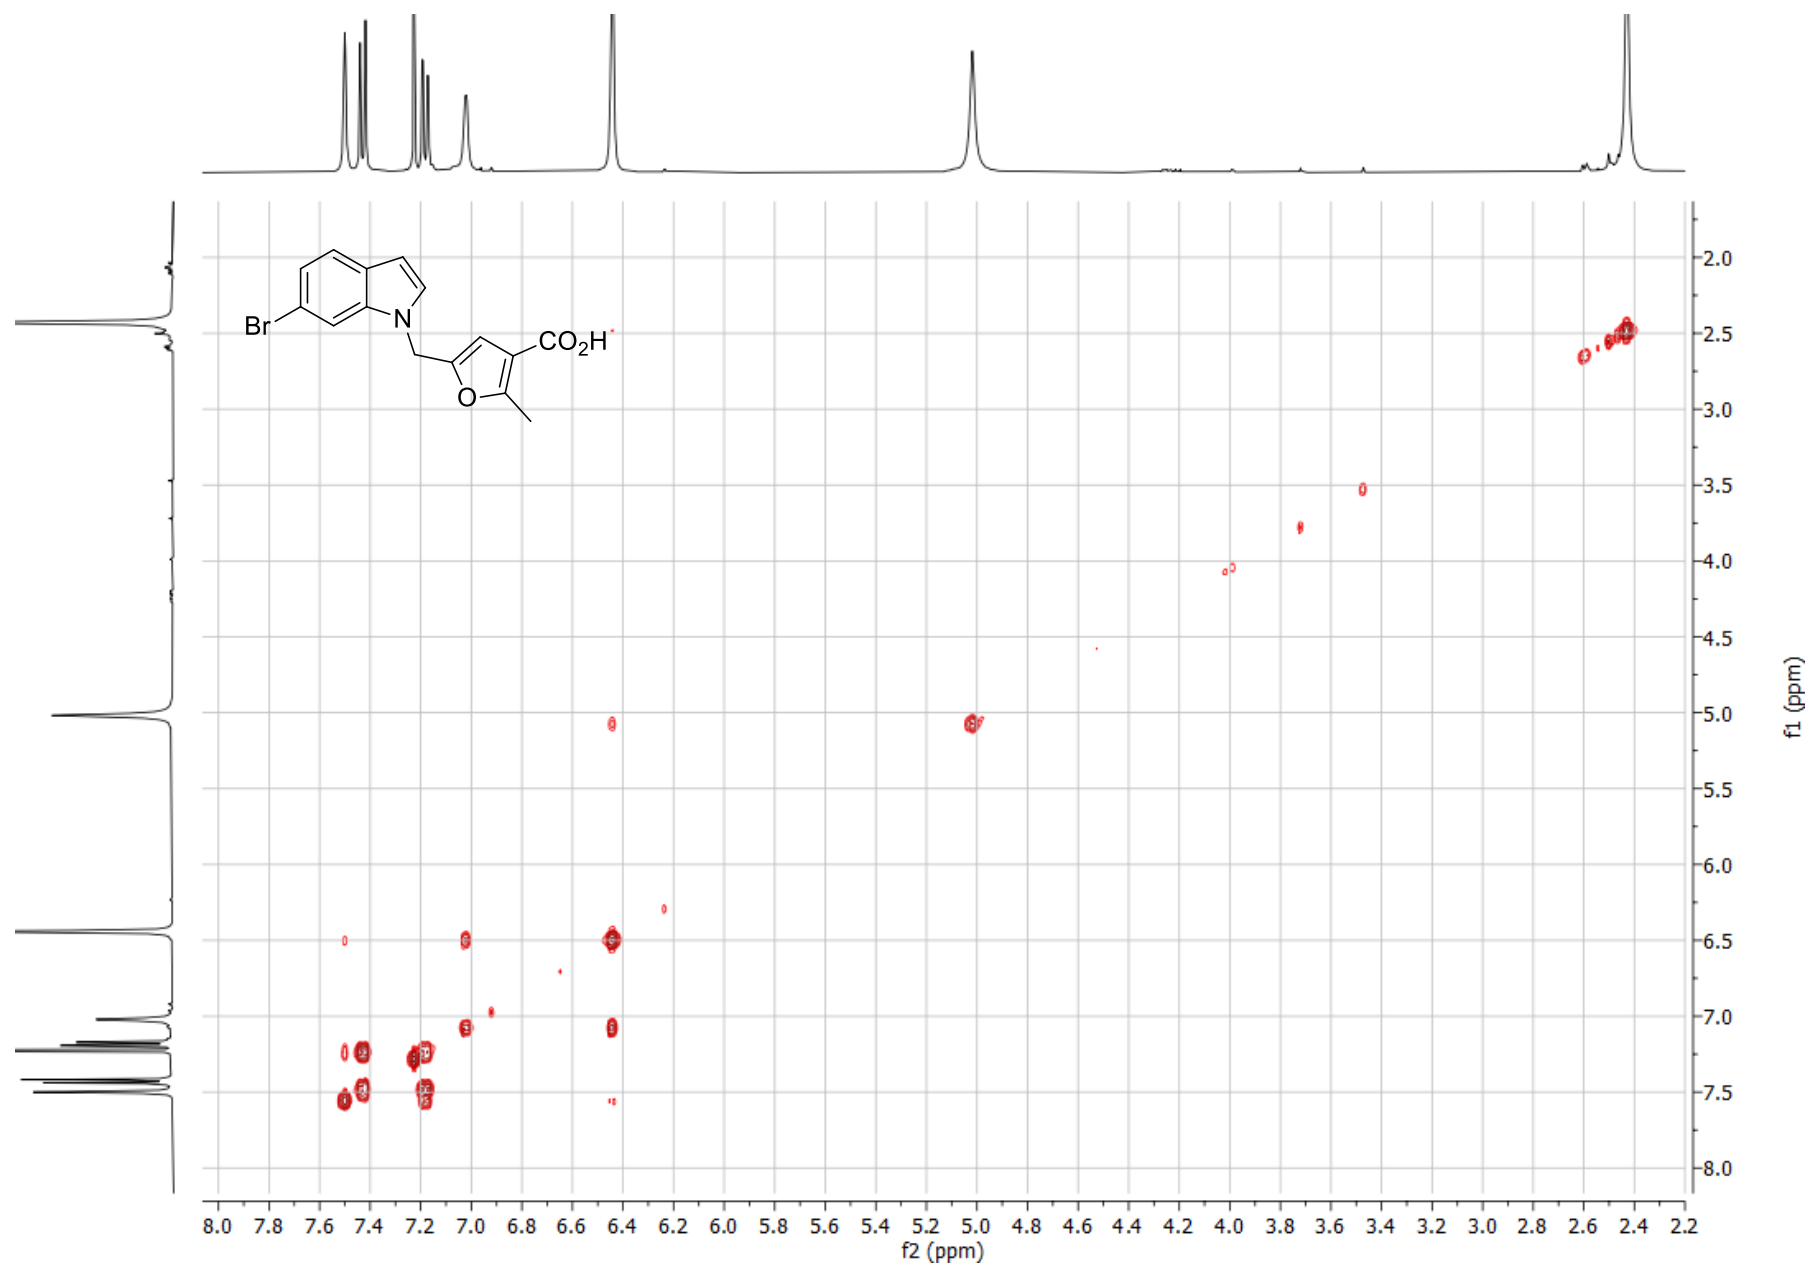

$^1\text{H}$ ,  $^{13}\text{C}$ -HSQC (400 & 101 MHz) in  $\text{CDCl}_3$

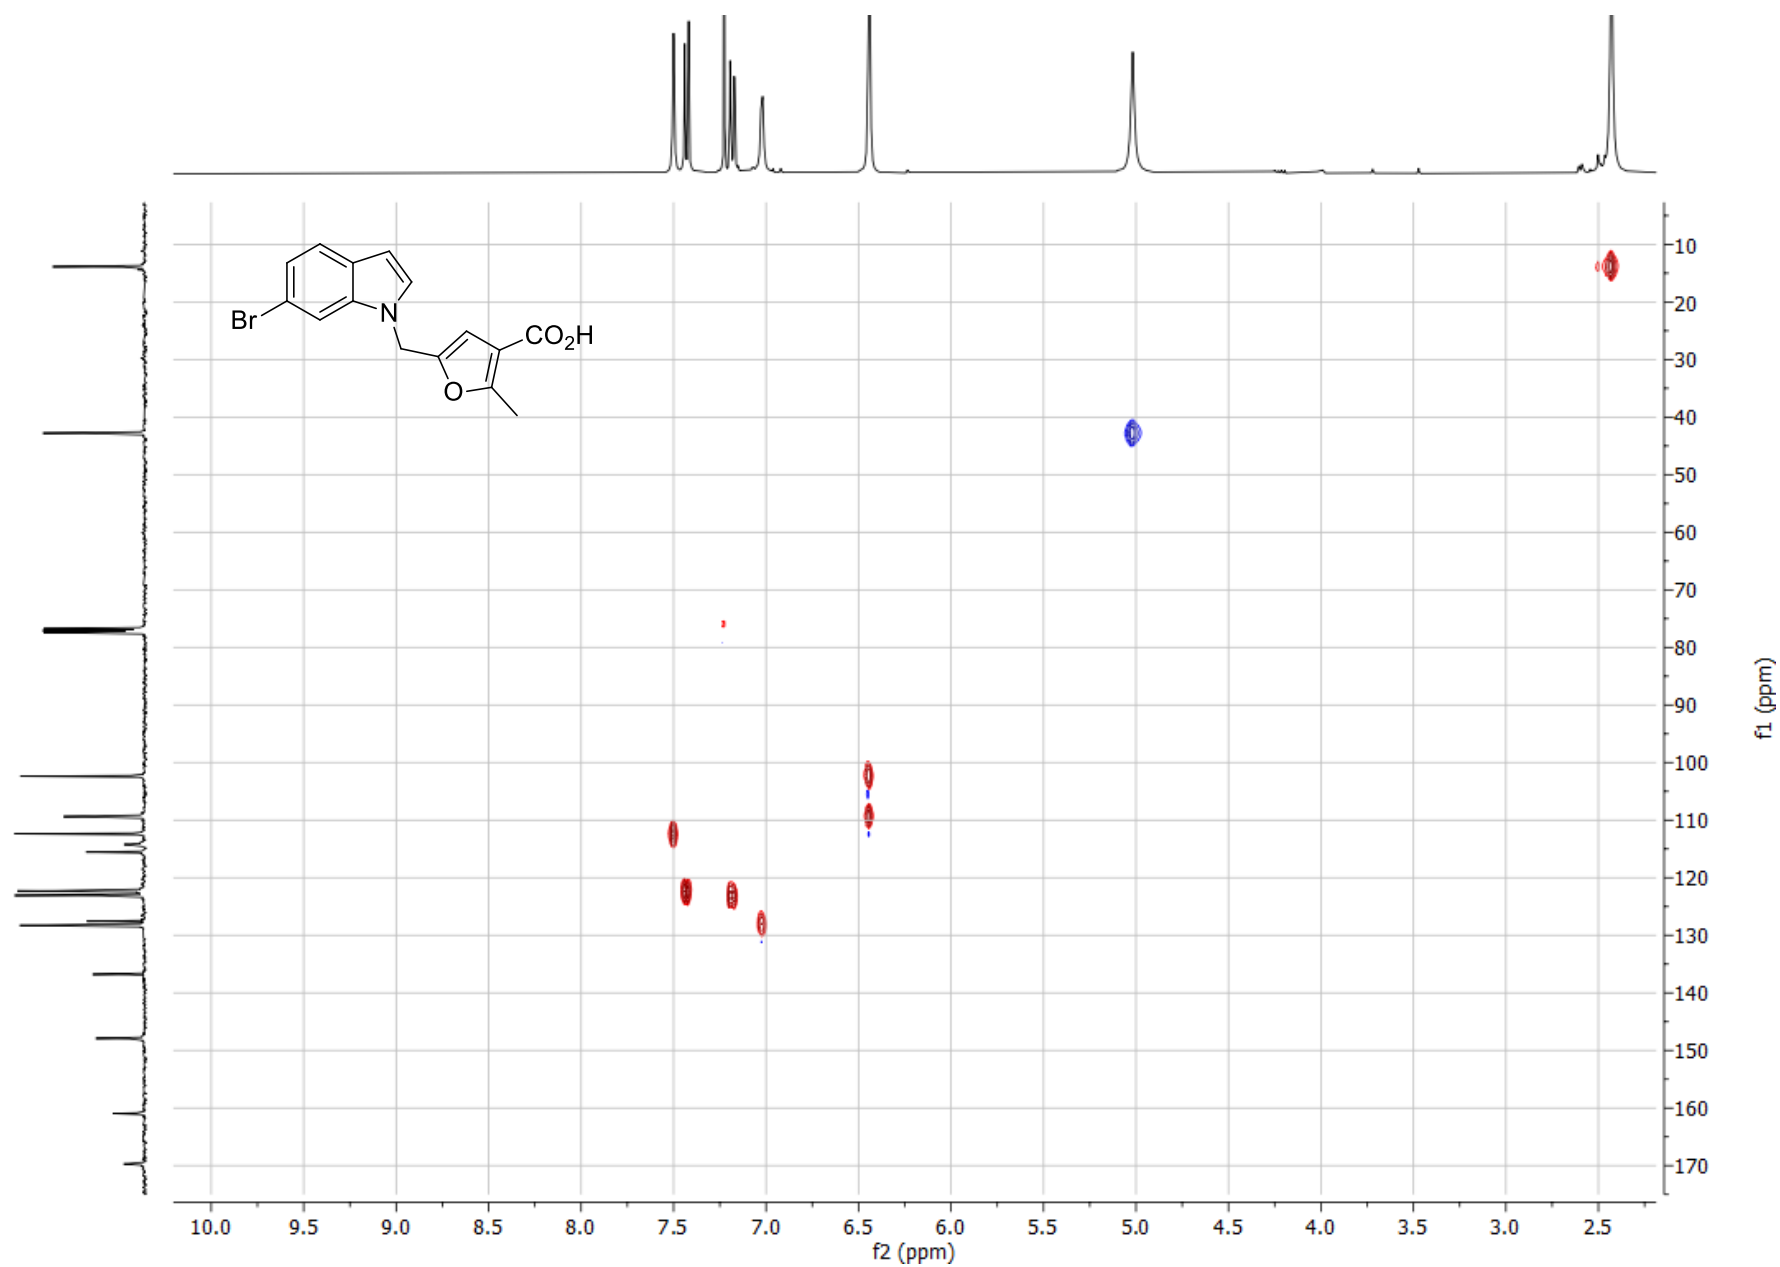

$^1\text{H}$ ,  $^{13}\text{C}$ -HMBC (400 & 101 MHz) in  $\text{CDCl}_3$

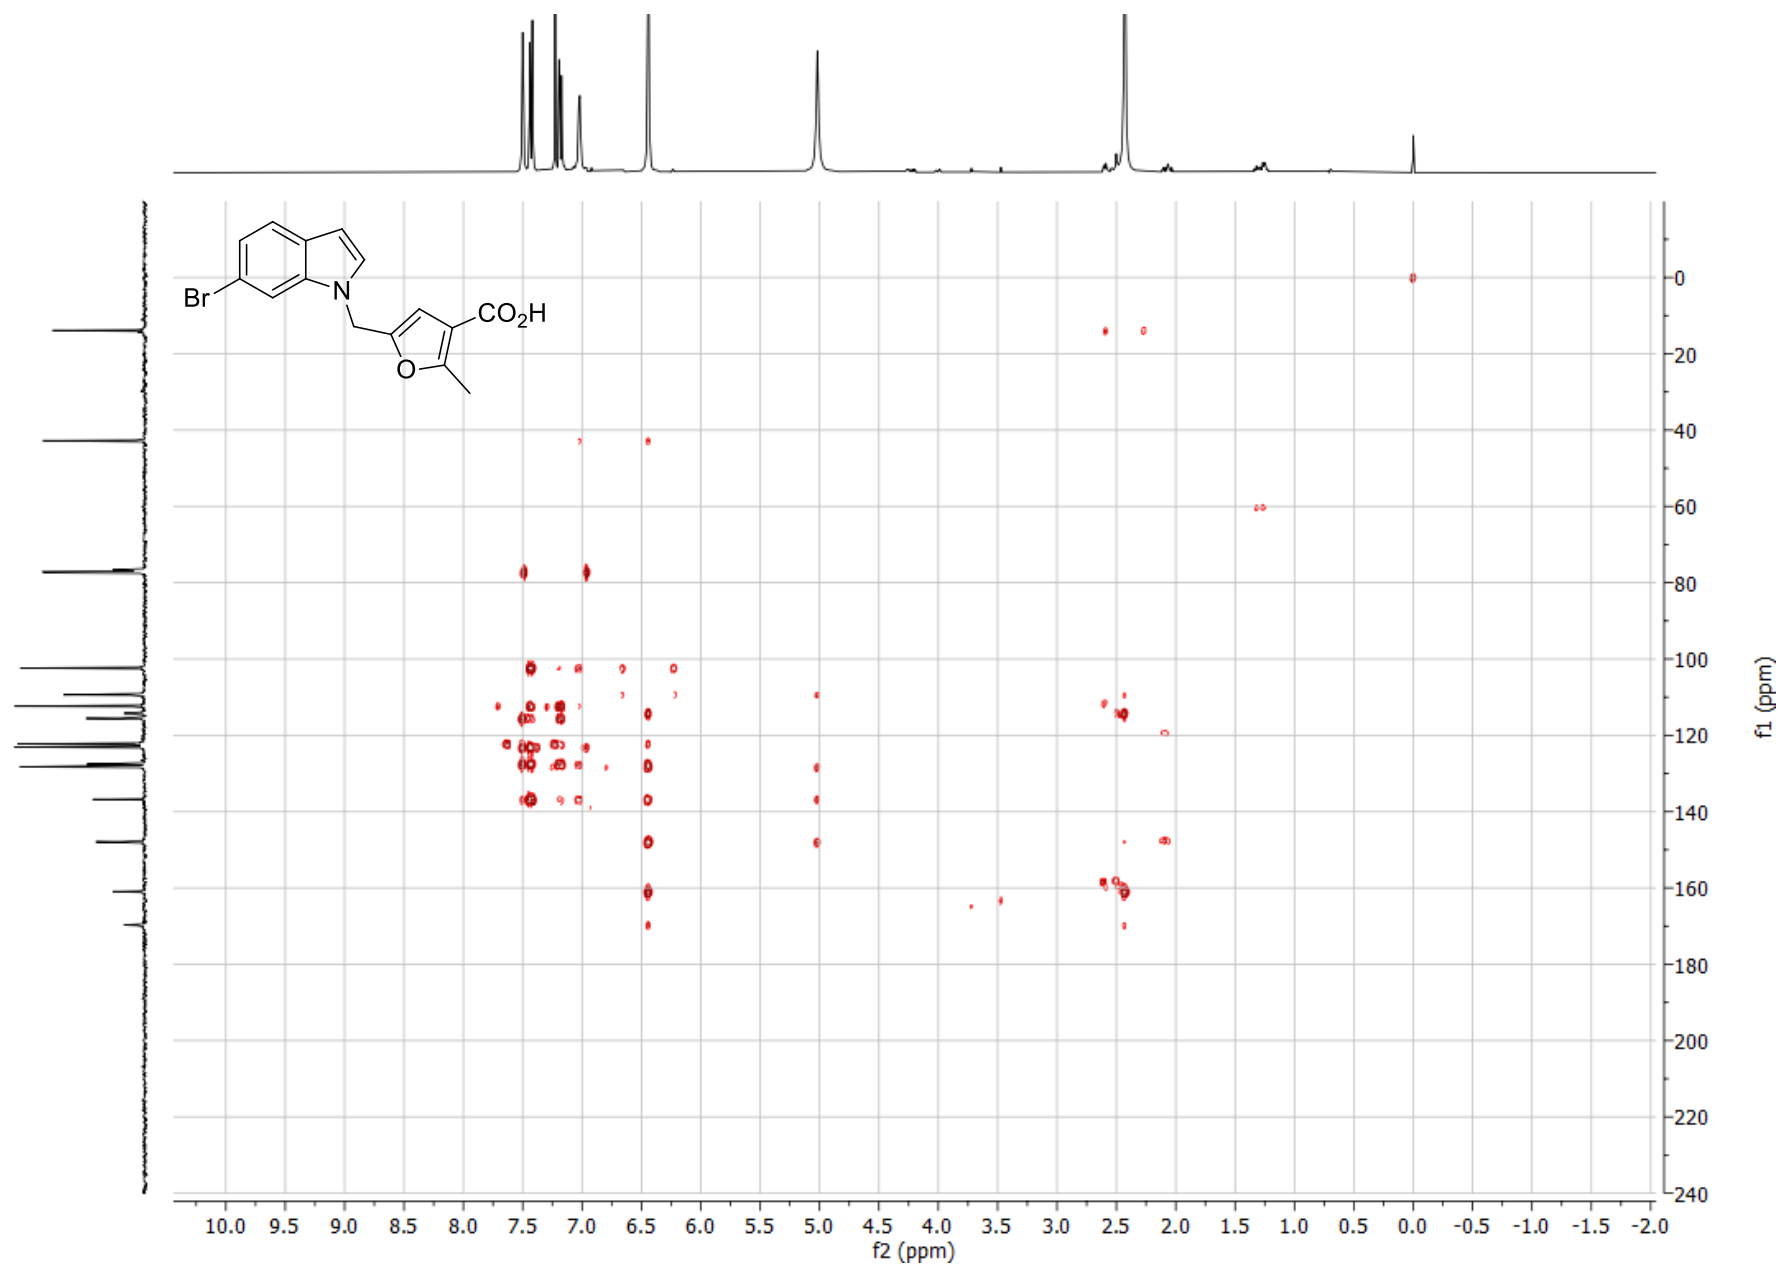

$^1\text{H}$  NMR (300 MHz) in  $\text{CDCl}_3$

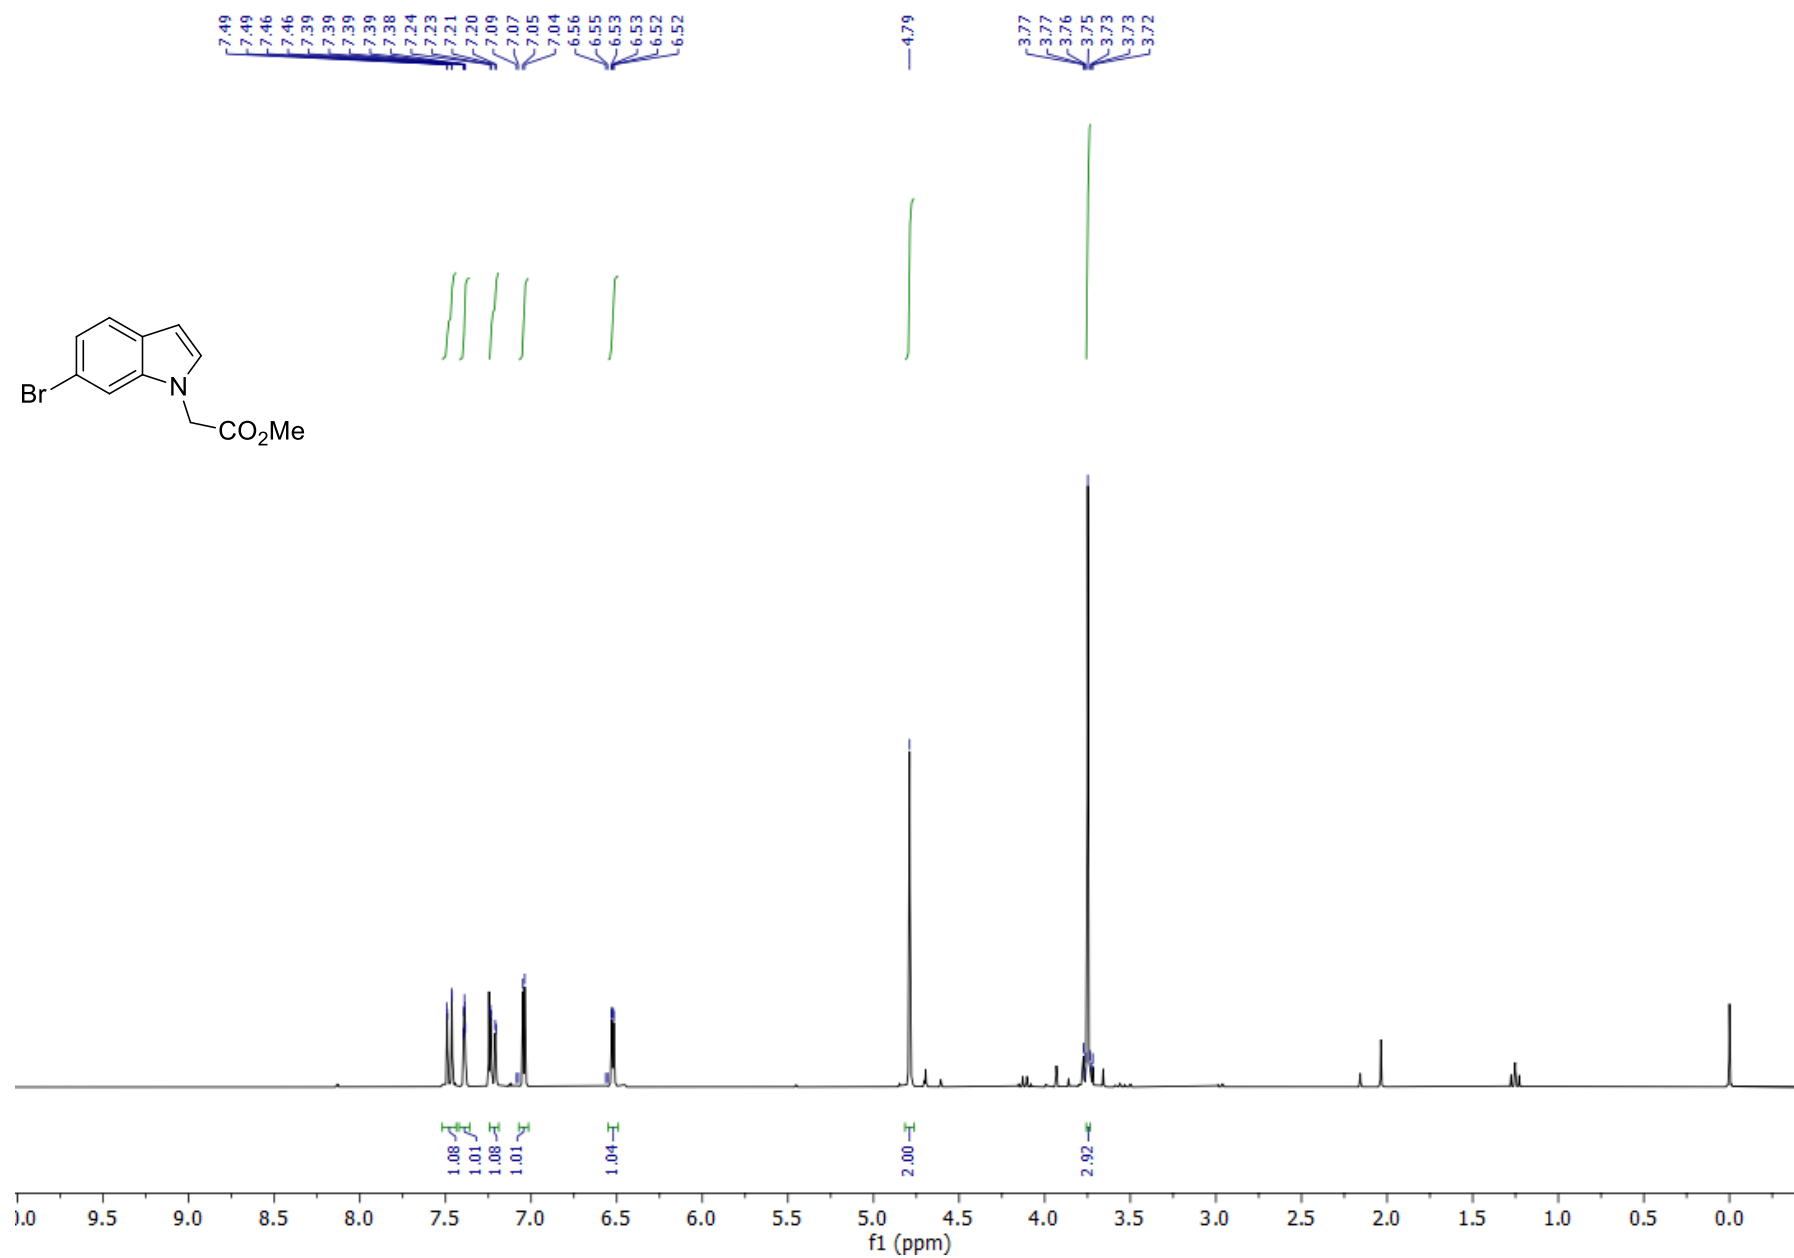

$^{13}\text{C}$  NMR (75 MHz) in  $\text{CDCl}_3$

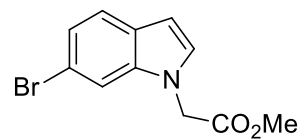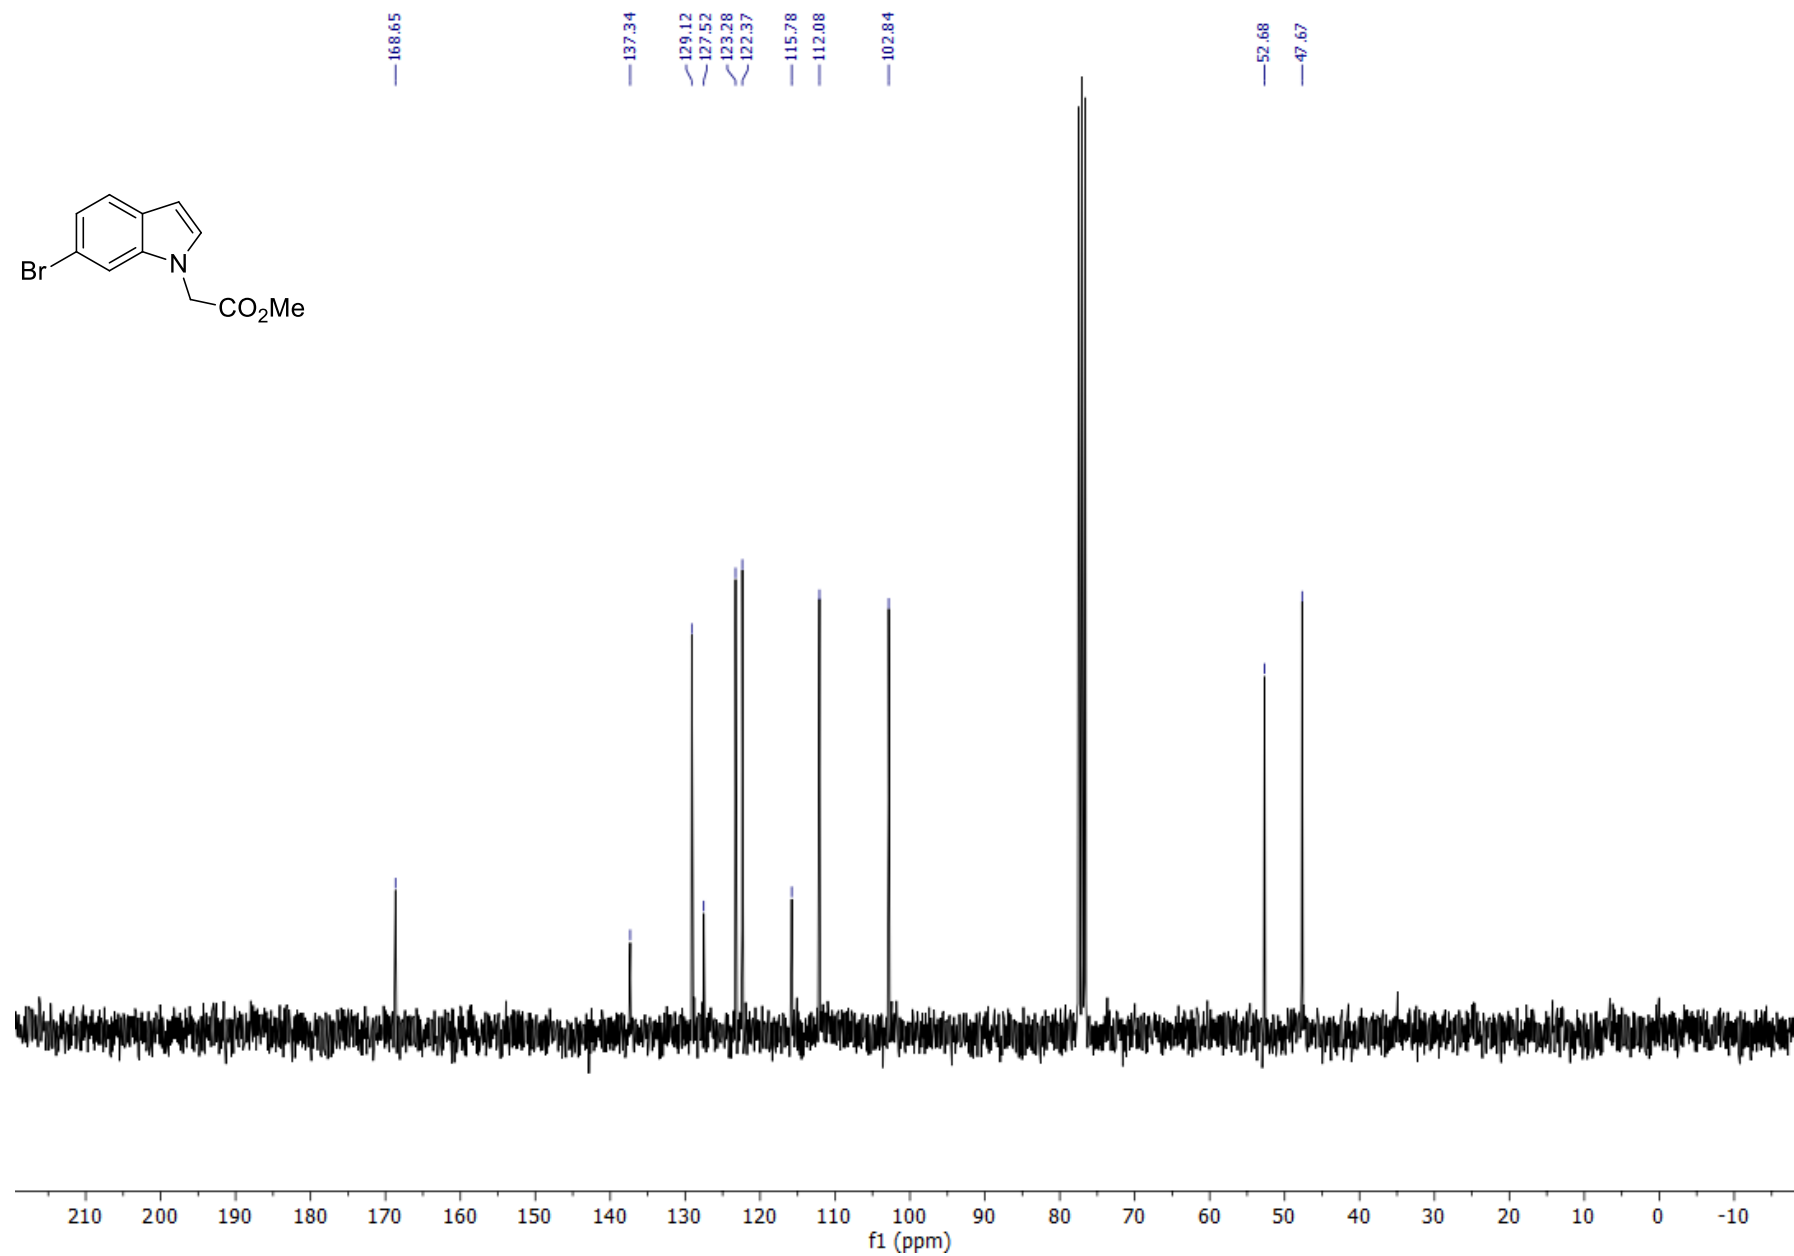

$^1\text{H}$  NMR (300 MHz) in DMSO- $d_6$

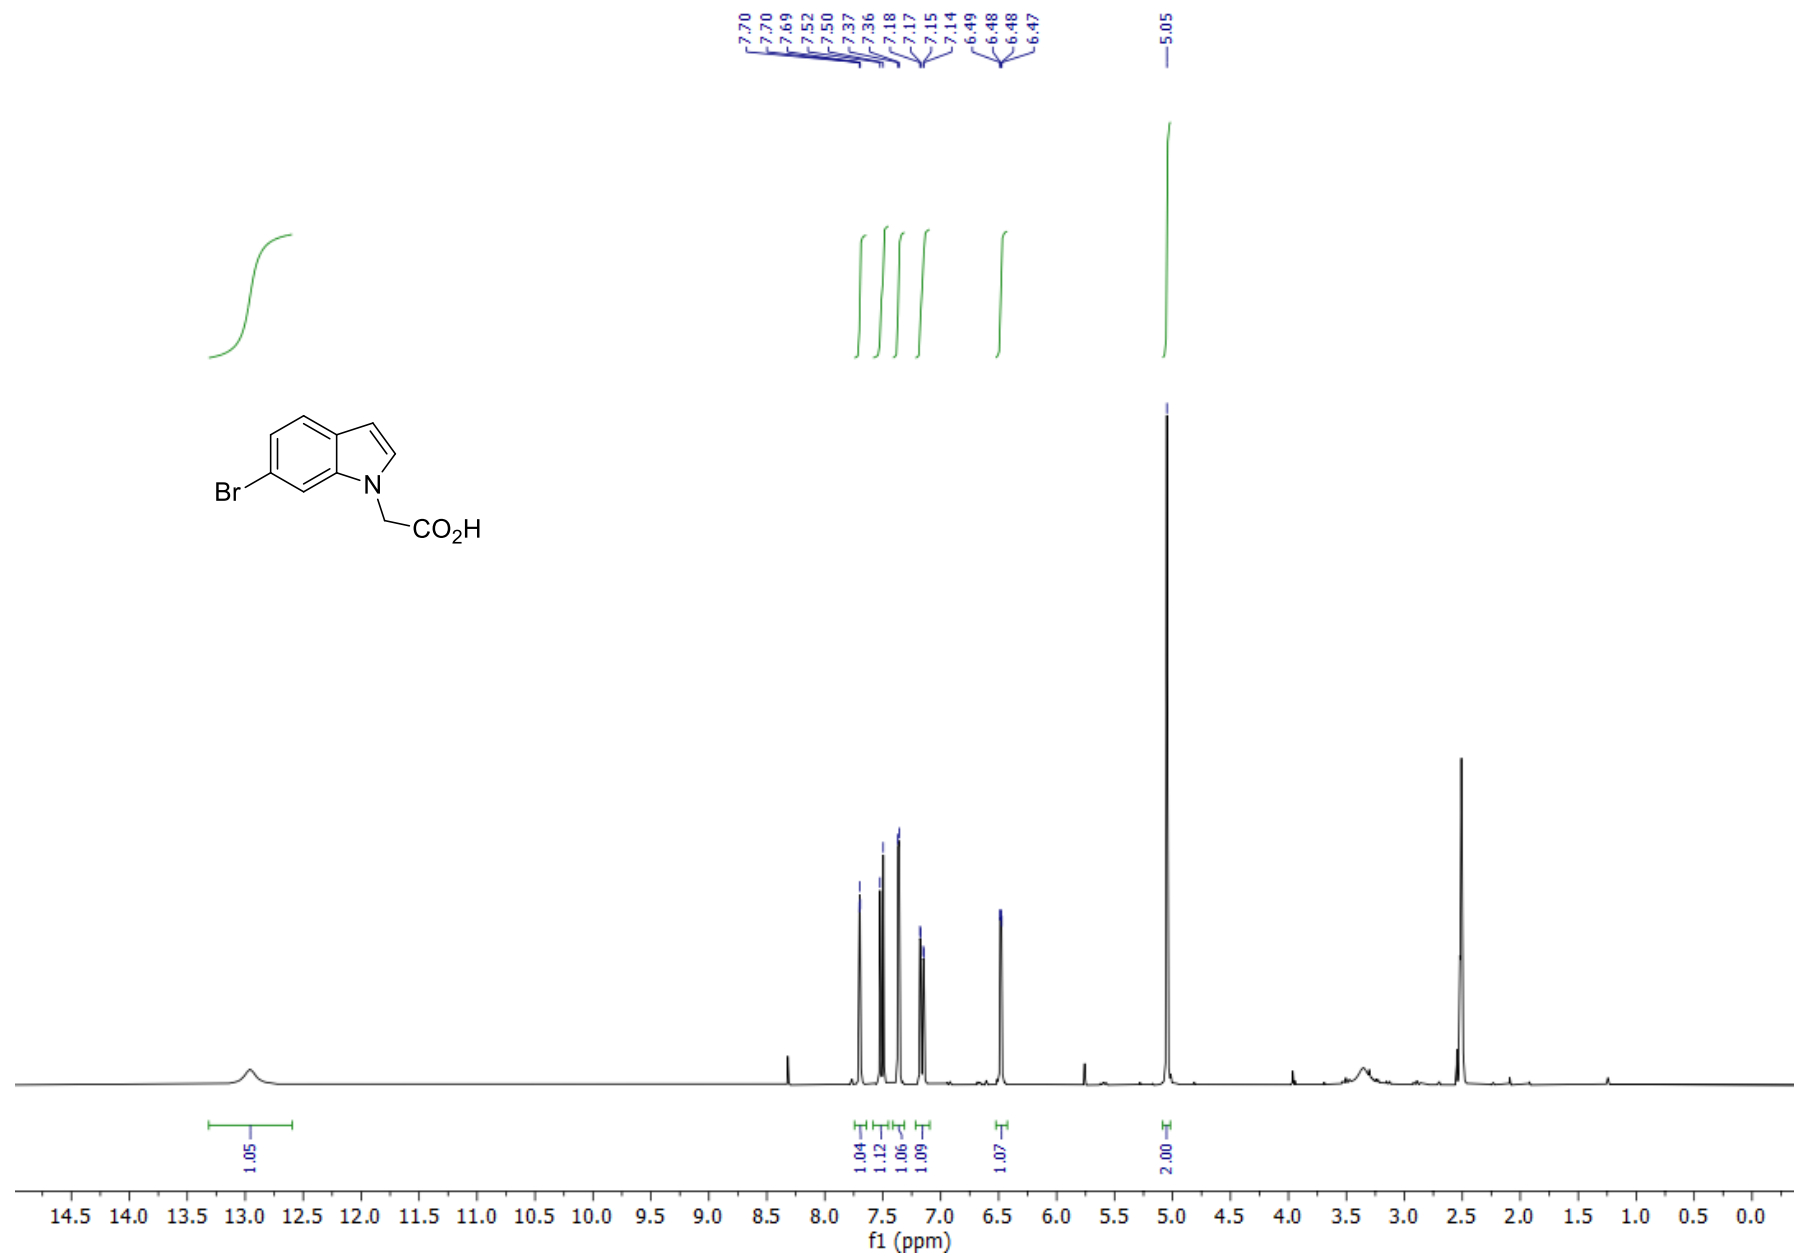

$^{13}\text{C}$  NMR (75 MHz) in DMSO-d<sub>6</sub>

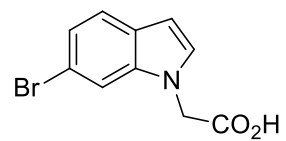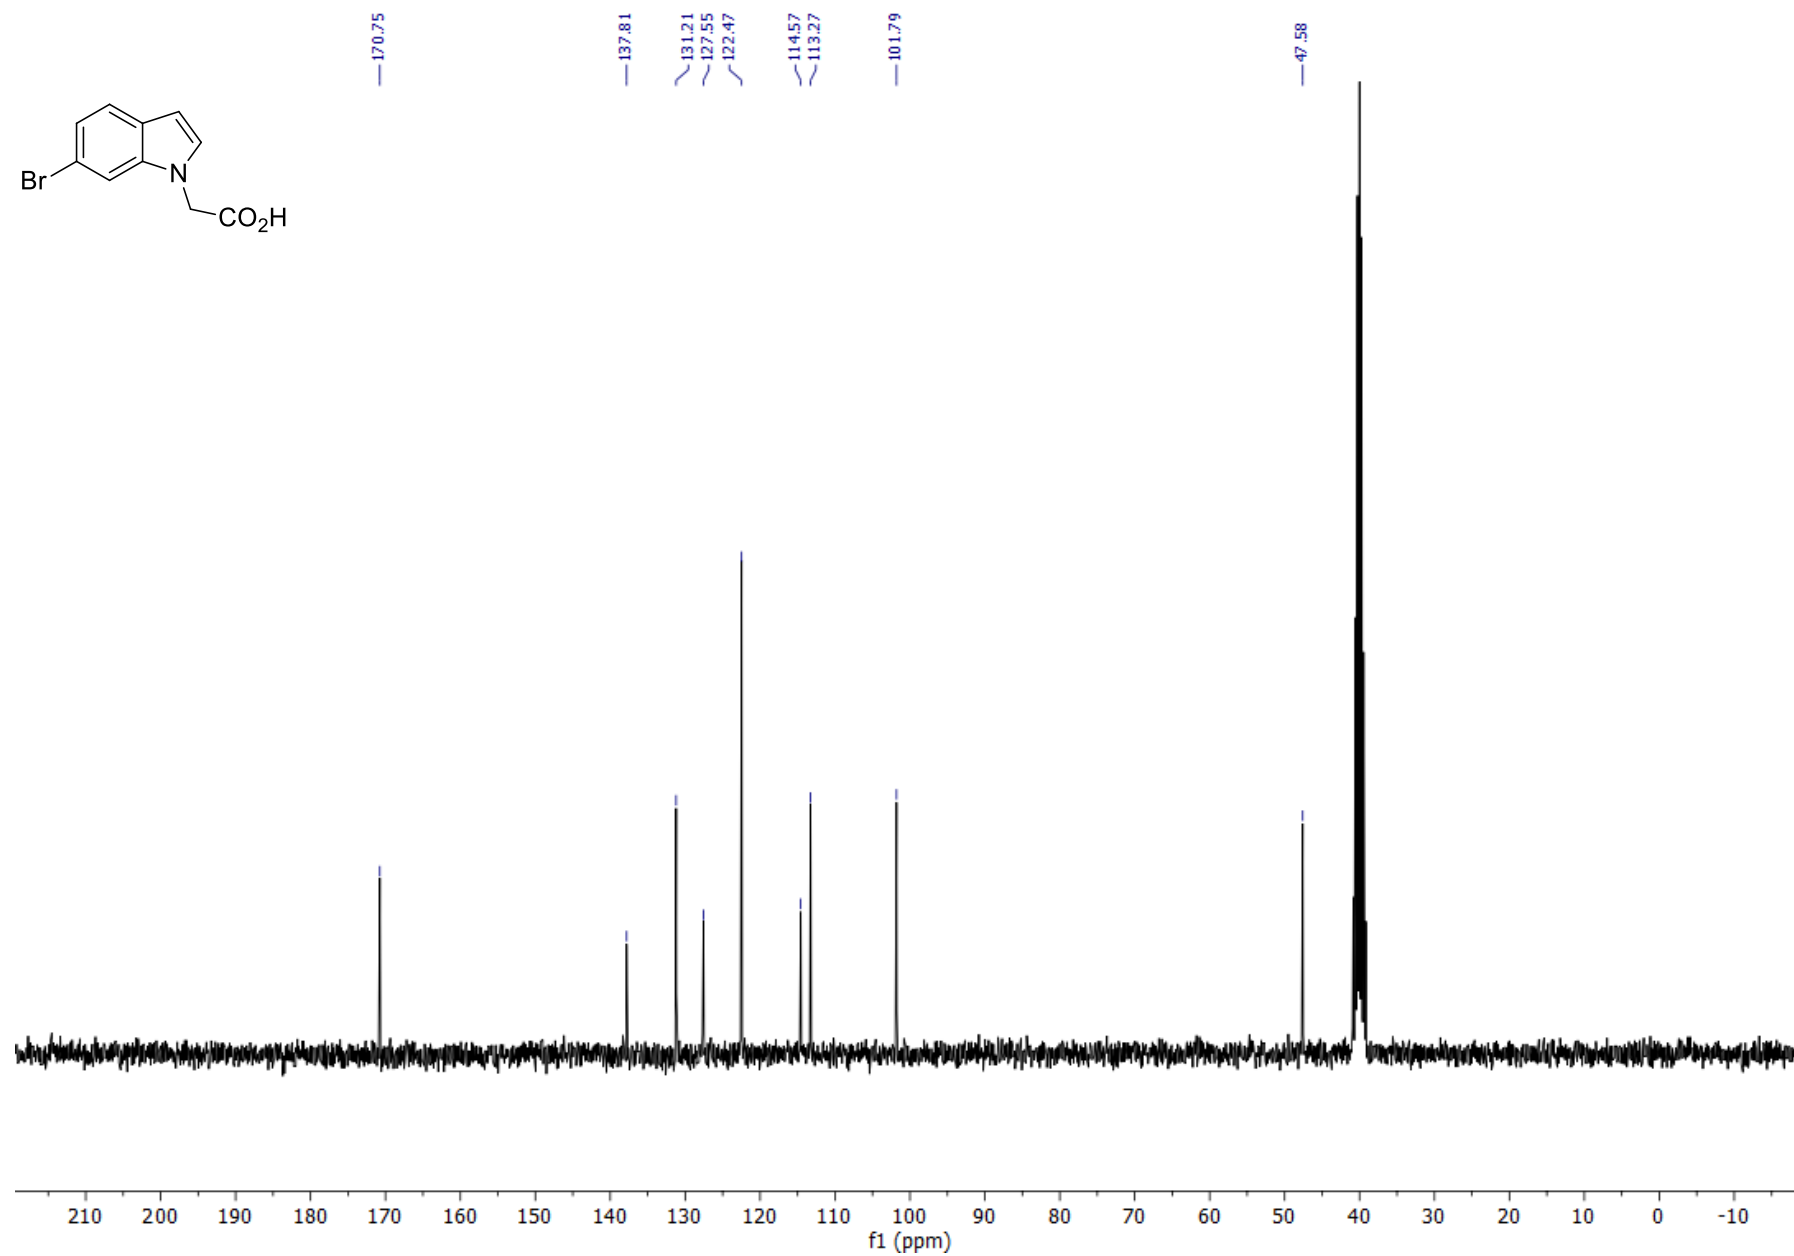

$^1\text{H}$  NMR (300 MHz) in  $\text{CDCl}_3$

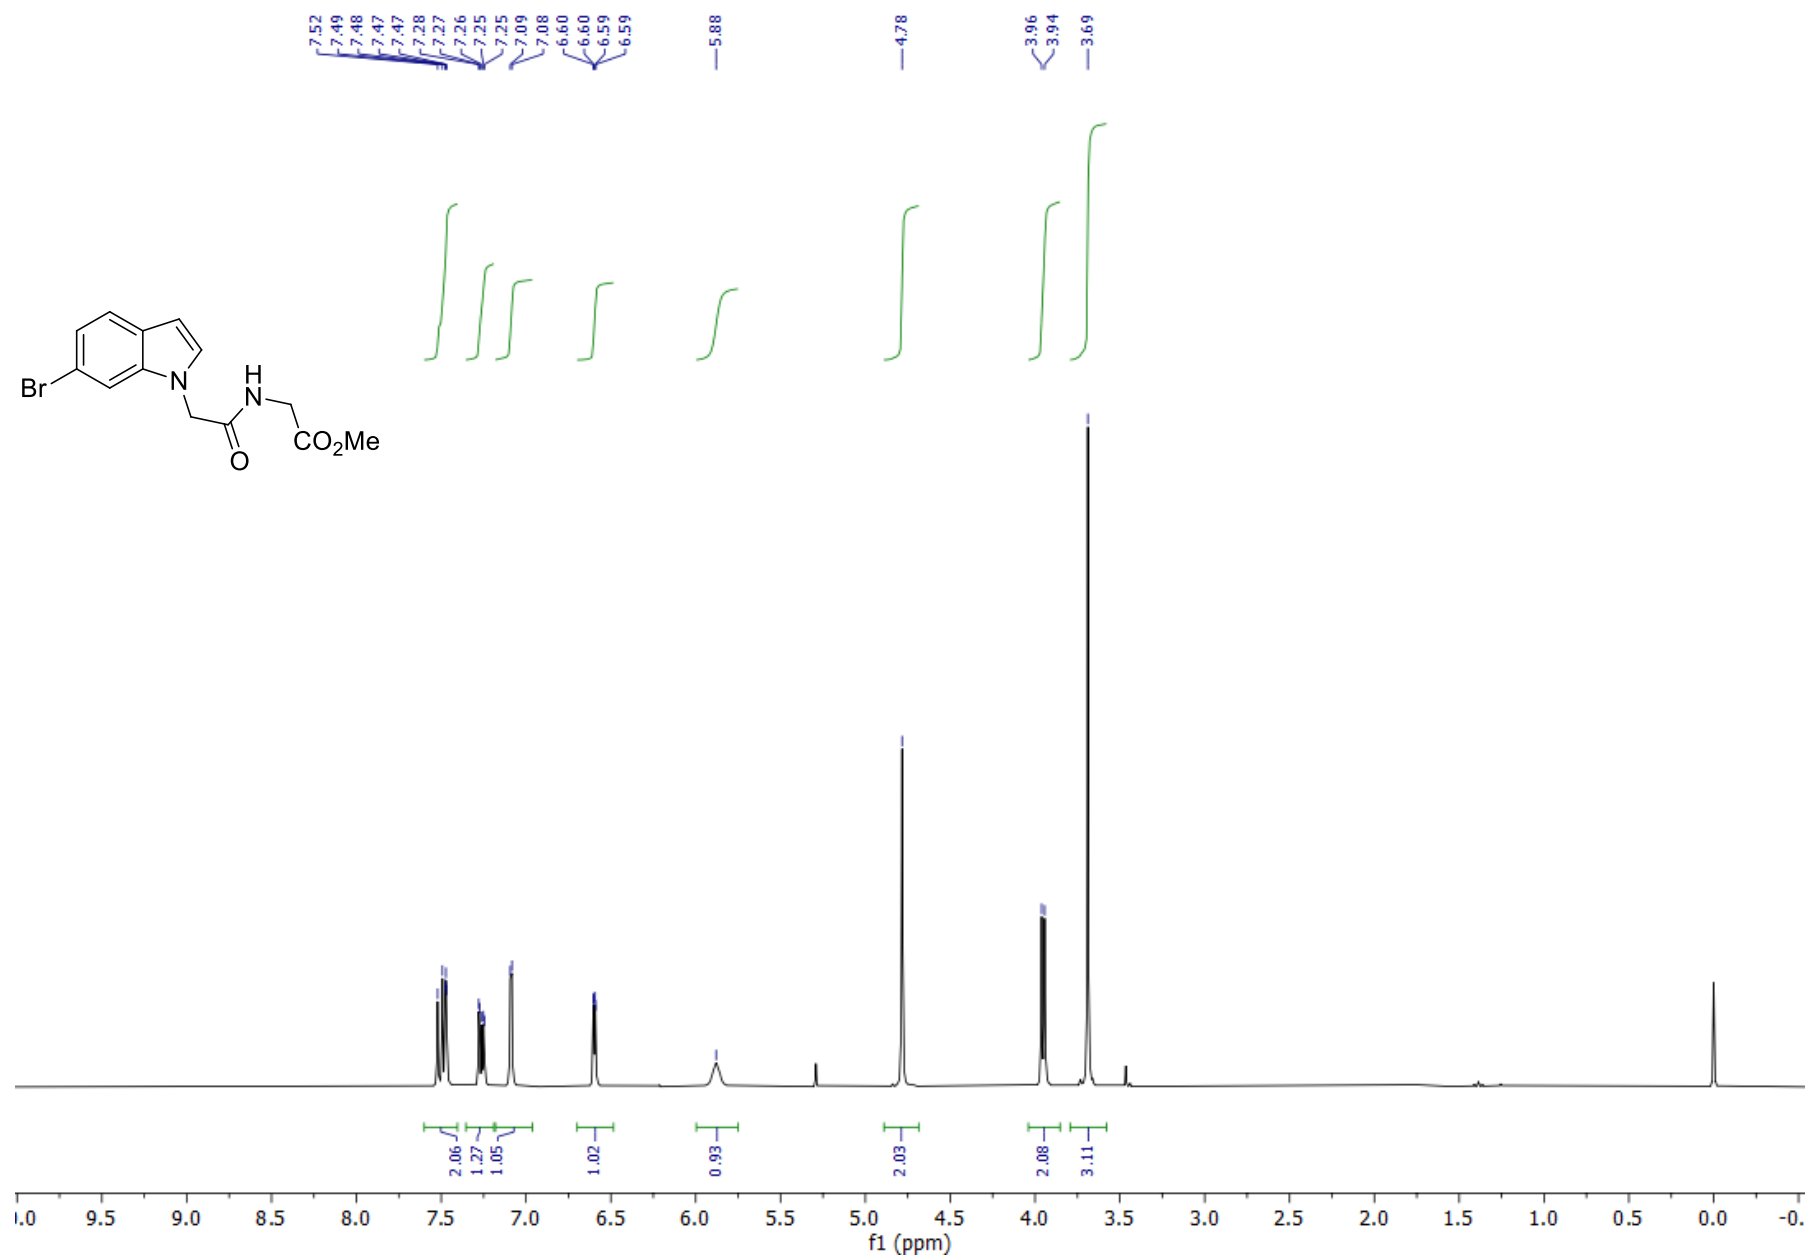



$^{13}\text{C}$  NMR (75 MHz) in  $\text{CDCl}_3$

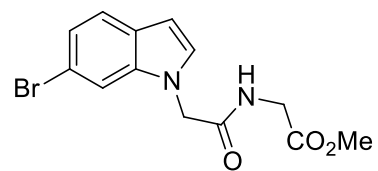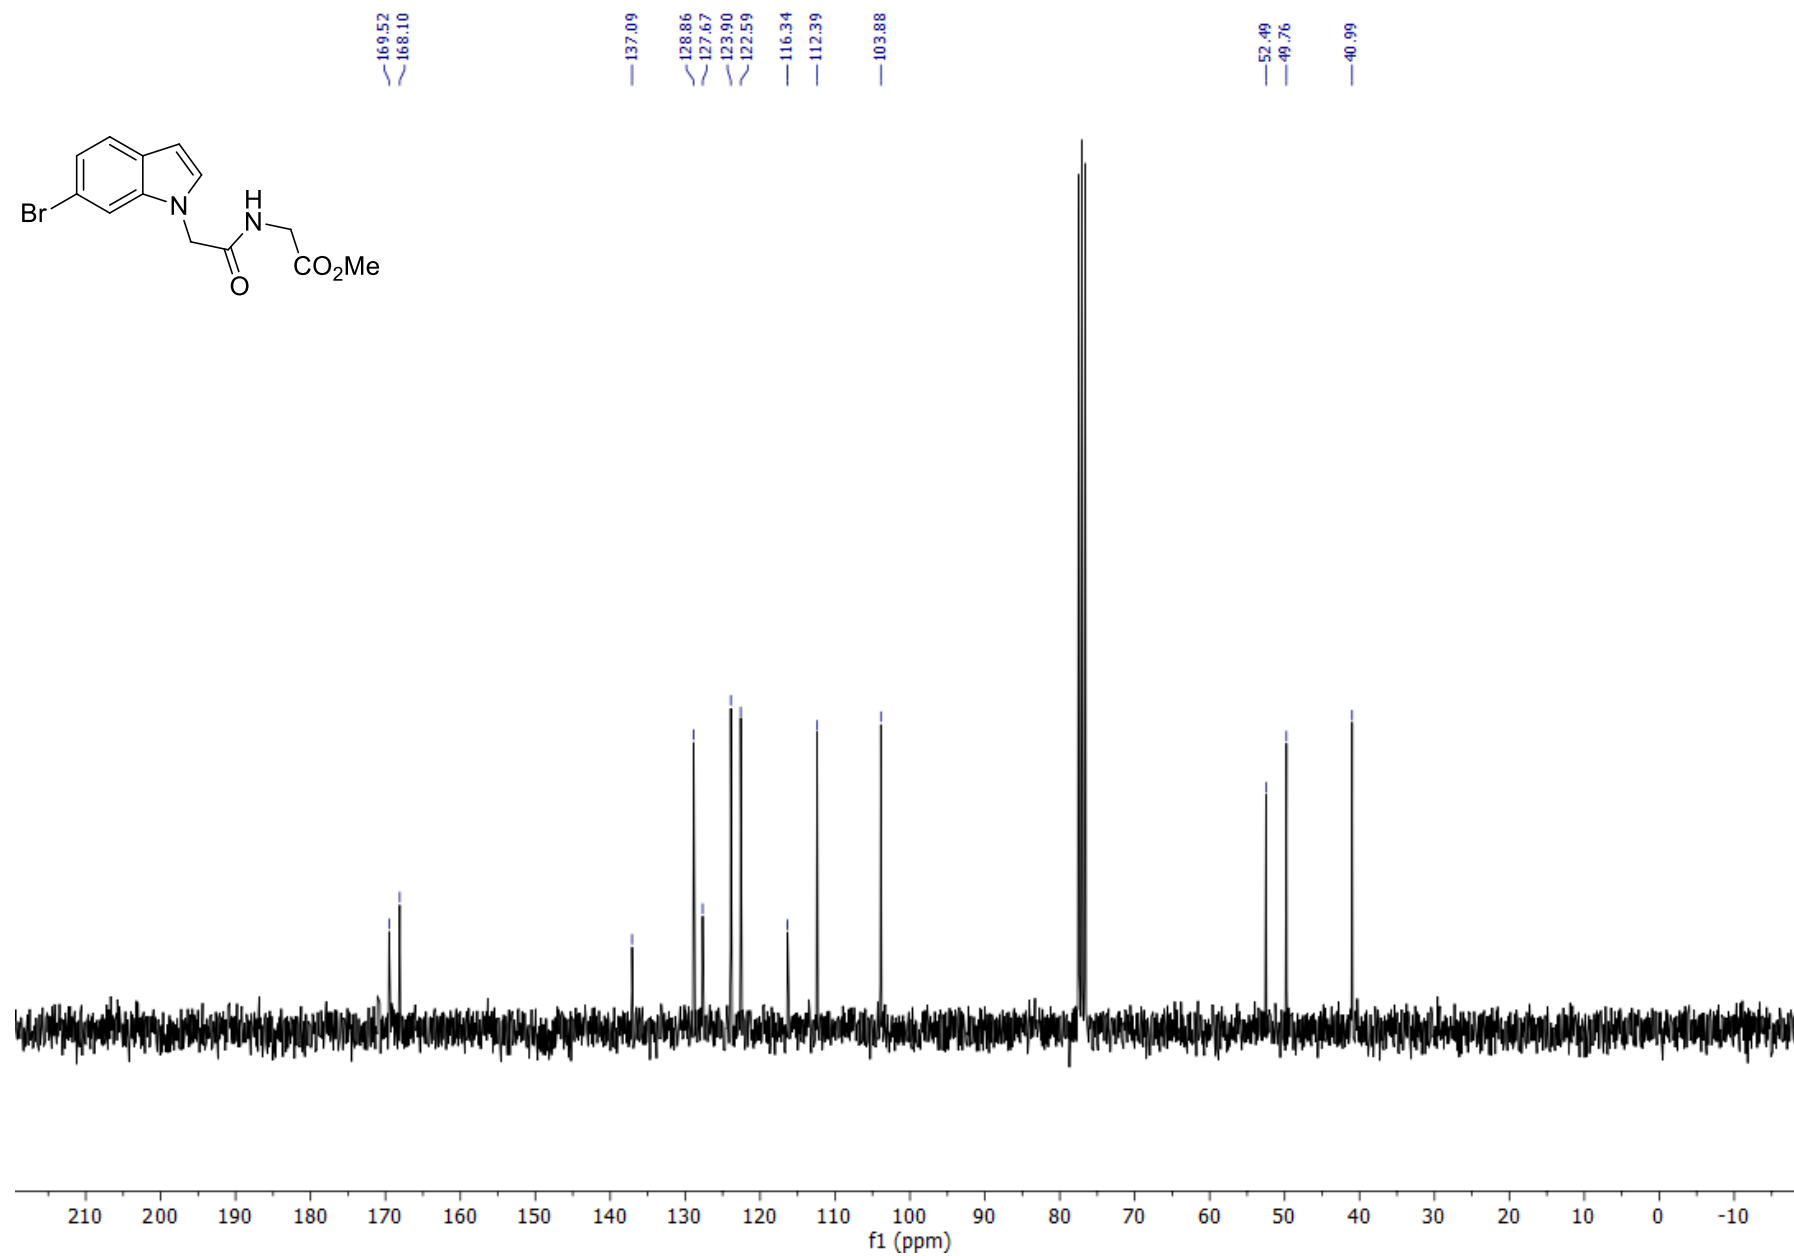

$^1\text{H}$  NMR (300 MHz) in  $\text{CDCl}_3$

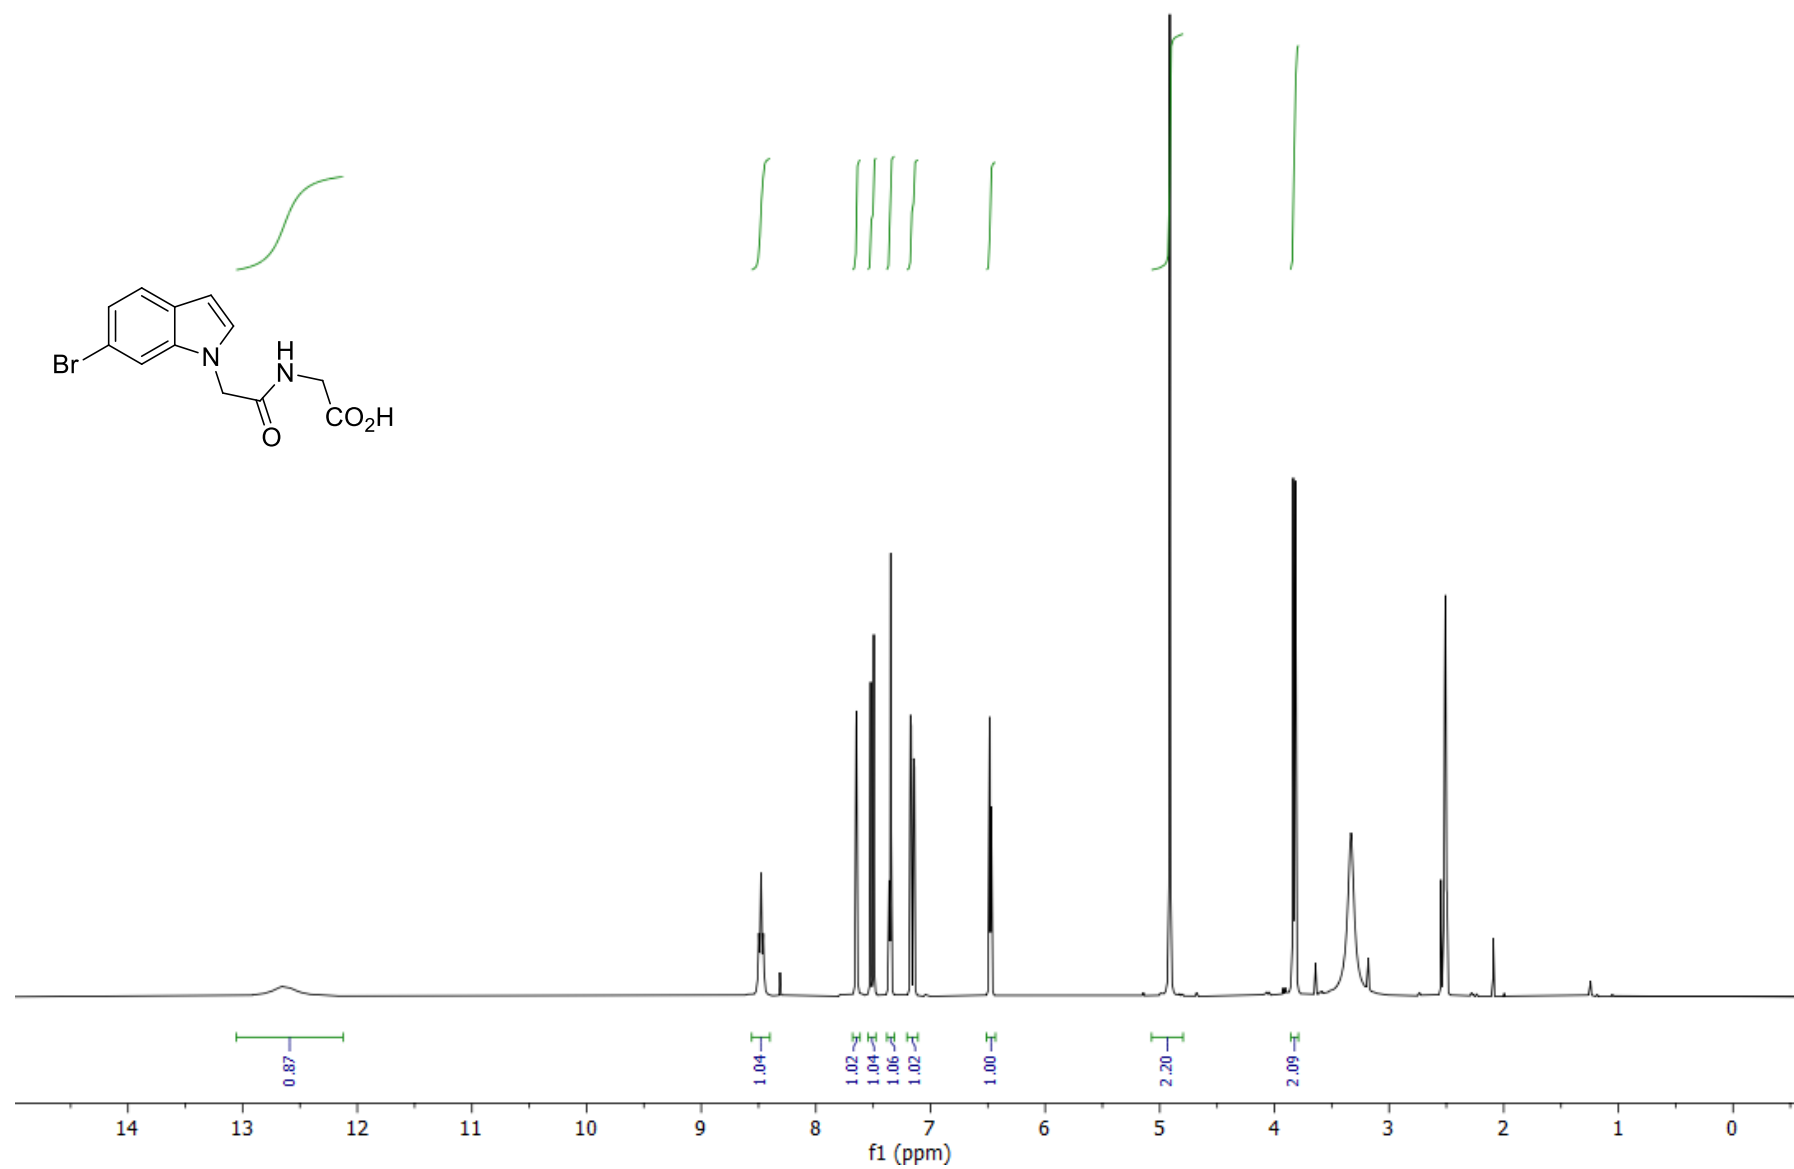

$^{13}\text{C}$  NMR (75 MHz) in  $\text{CDCl}_3$

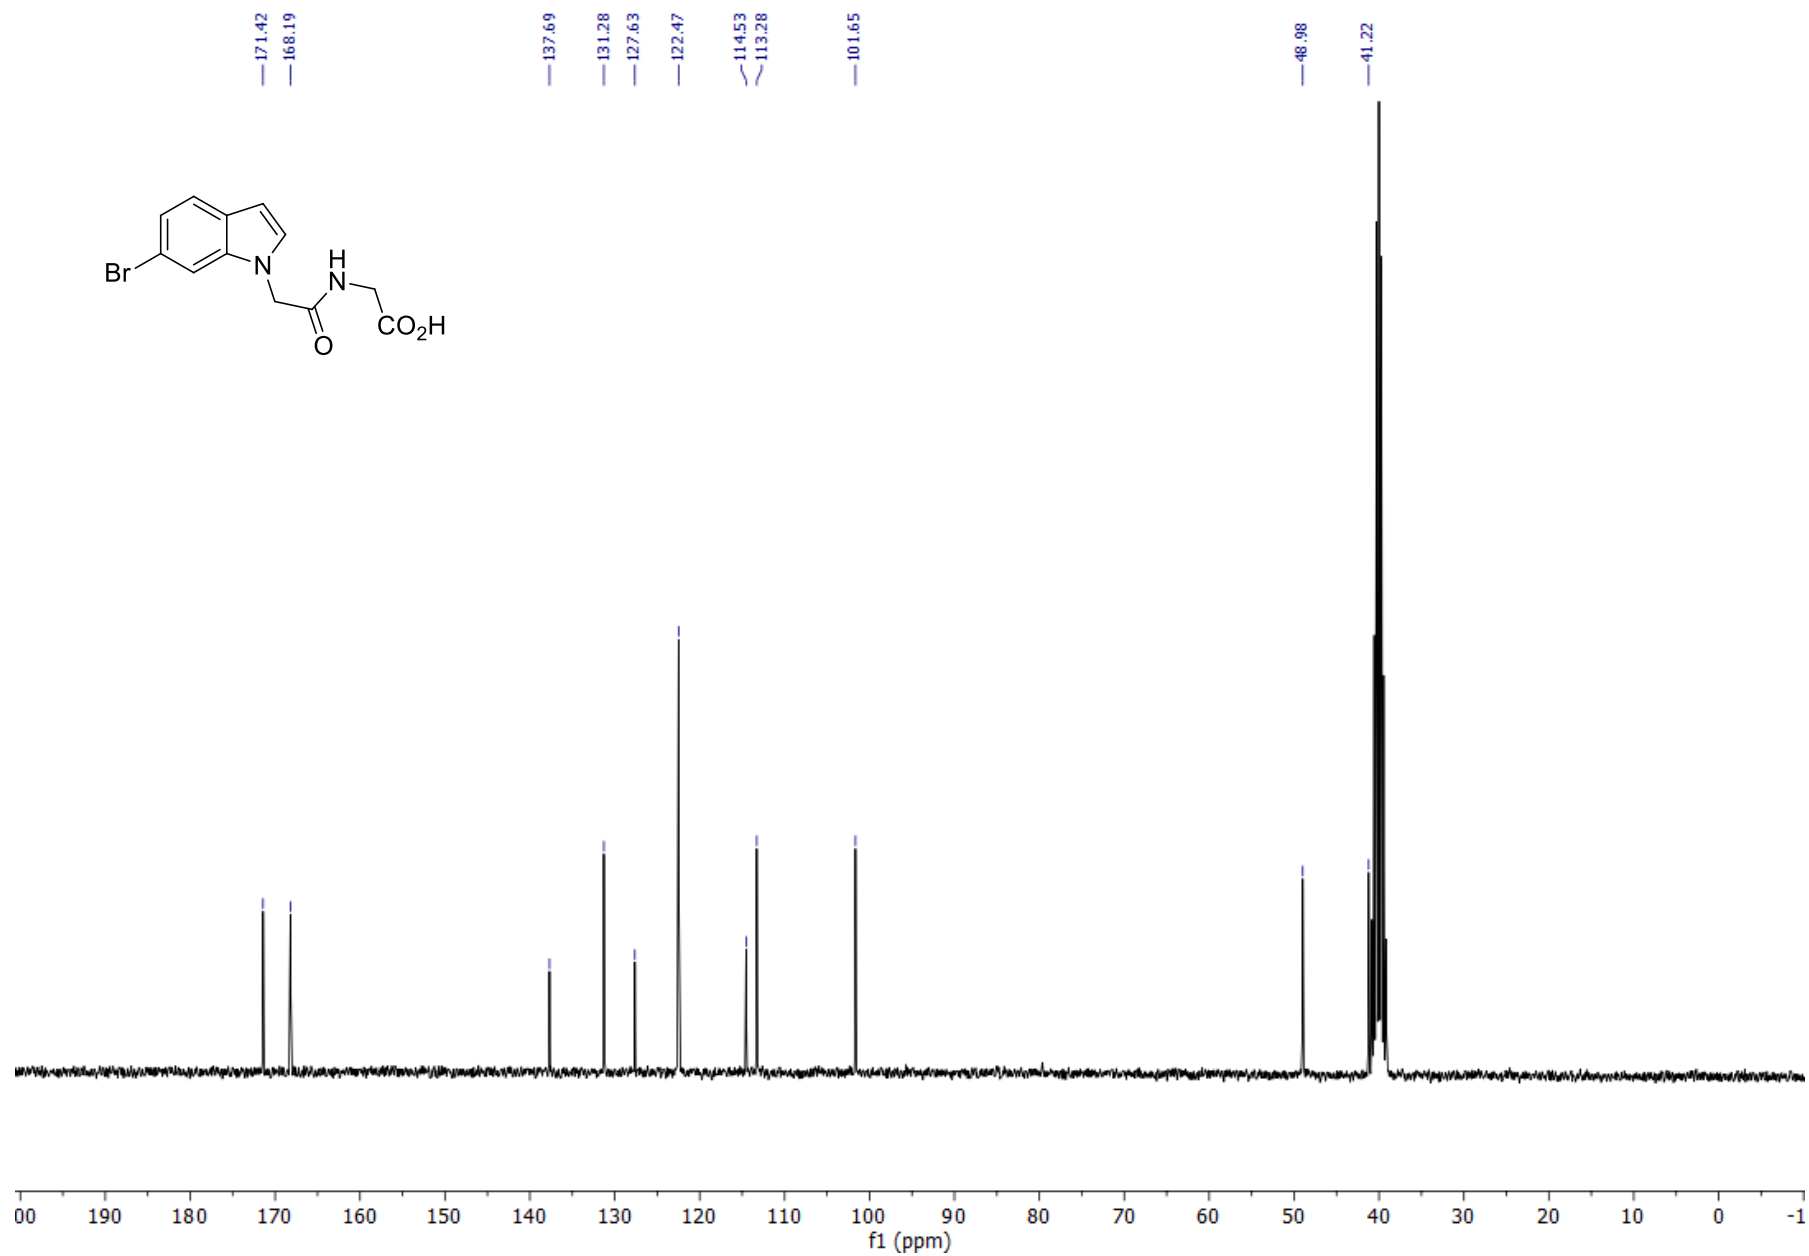

{<sup>13</sup>C}depts135 NMR (101 MHz) in CDCl<sub>3</sub>

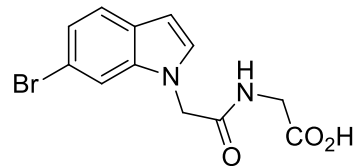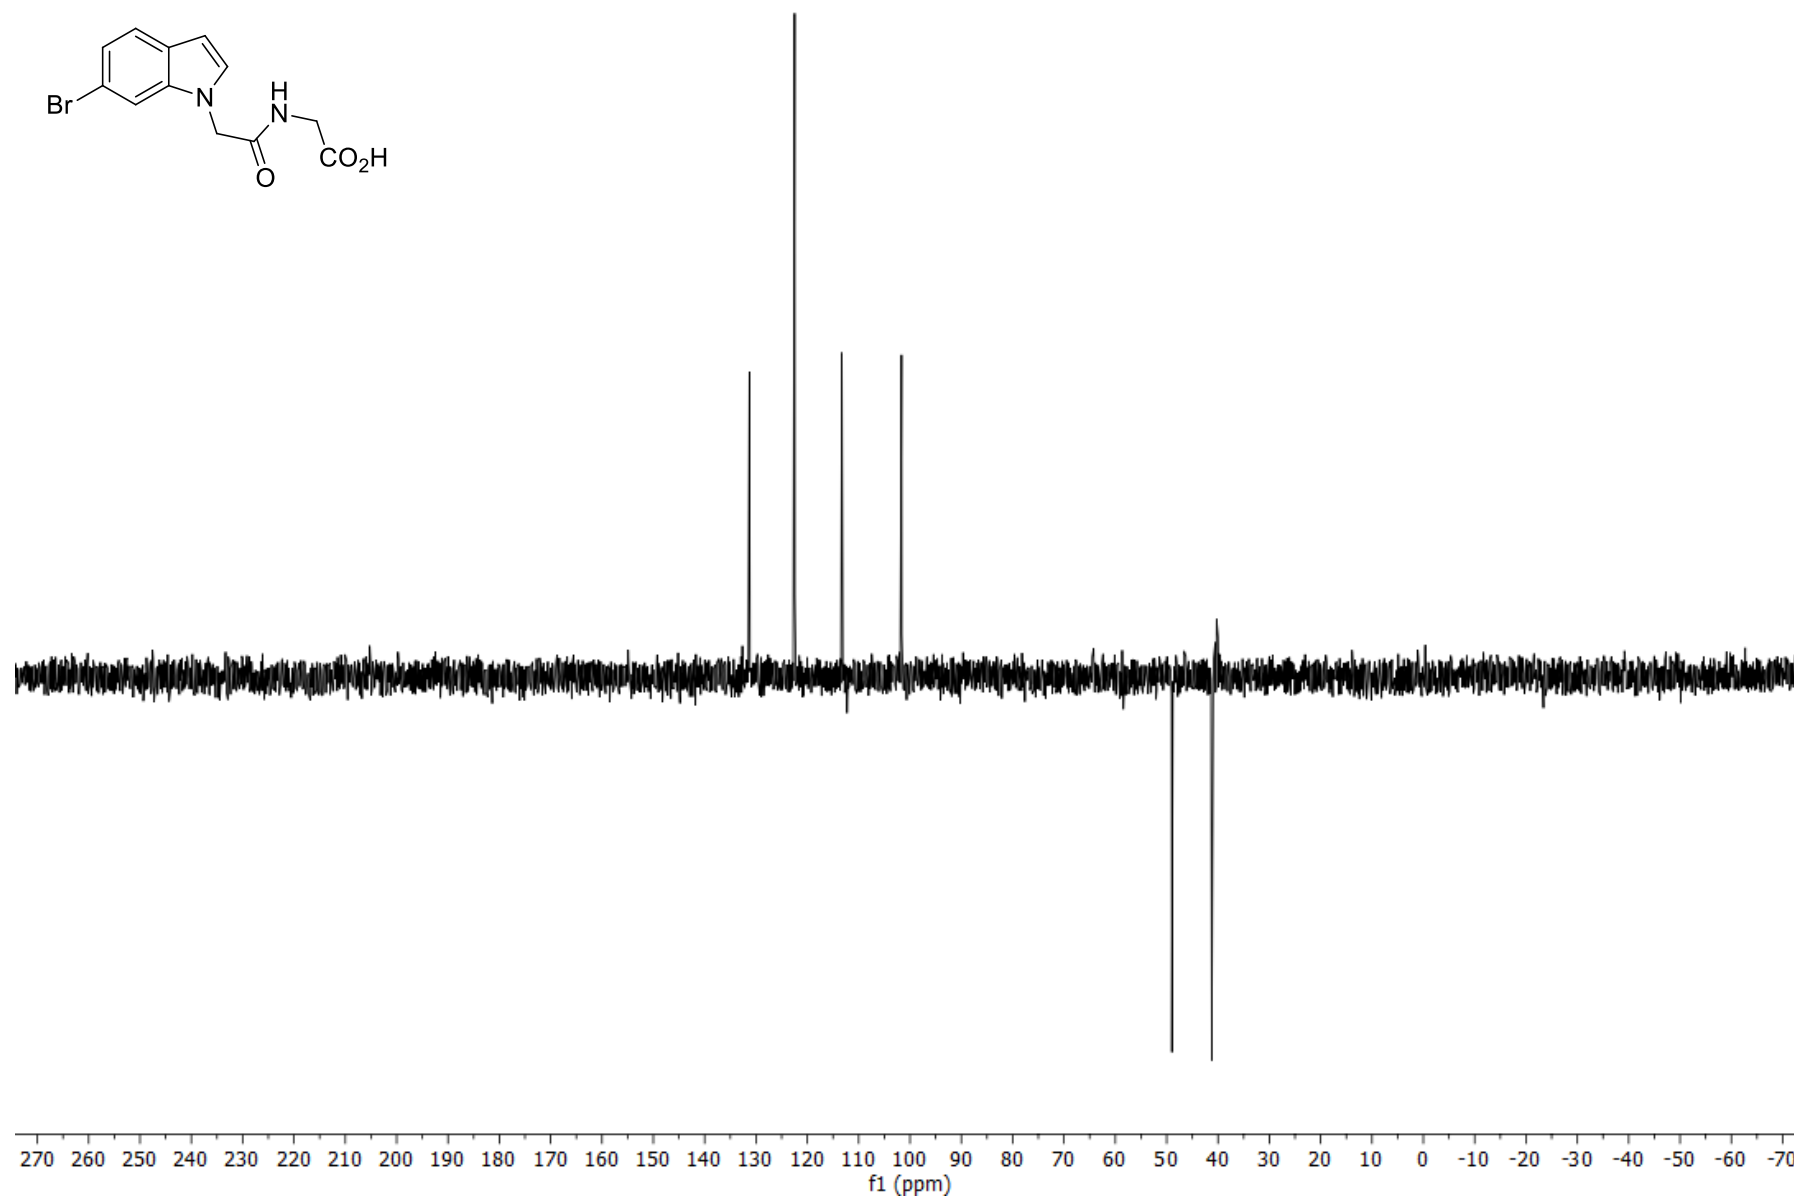

$^1\text{H}, ^1\text{H}$ -COSY (400 MHz) in  $\text{CDCl}_3$

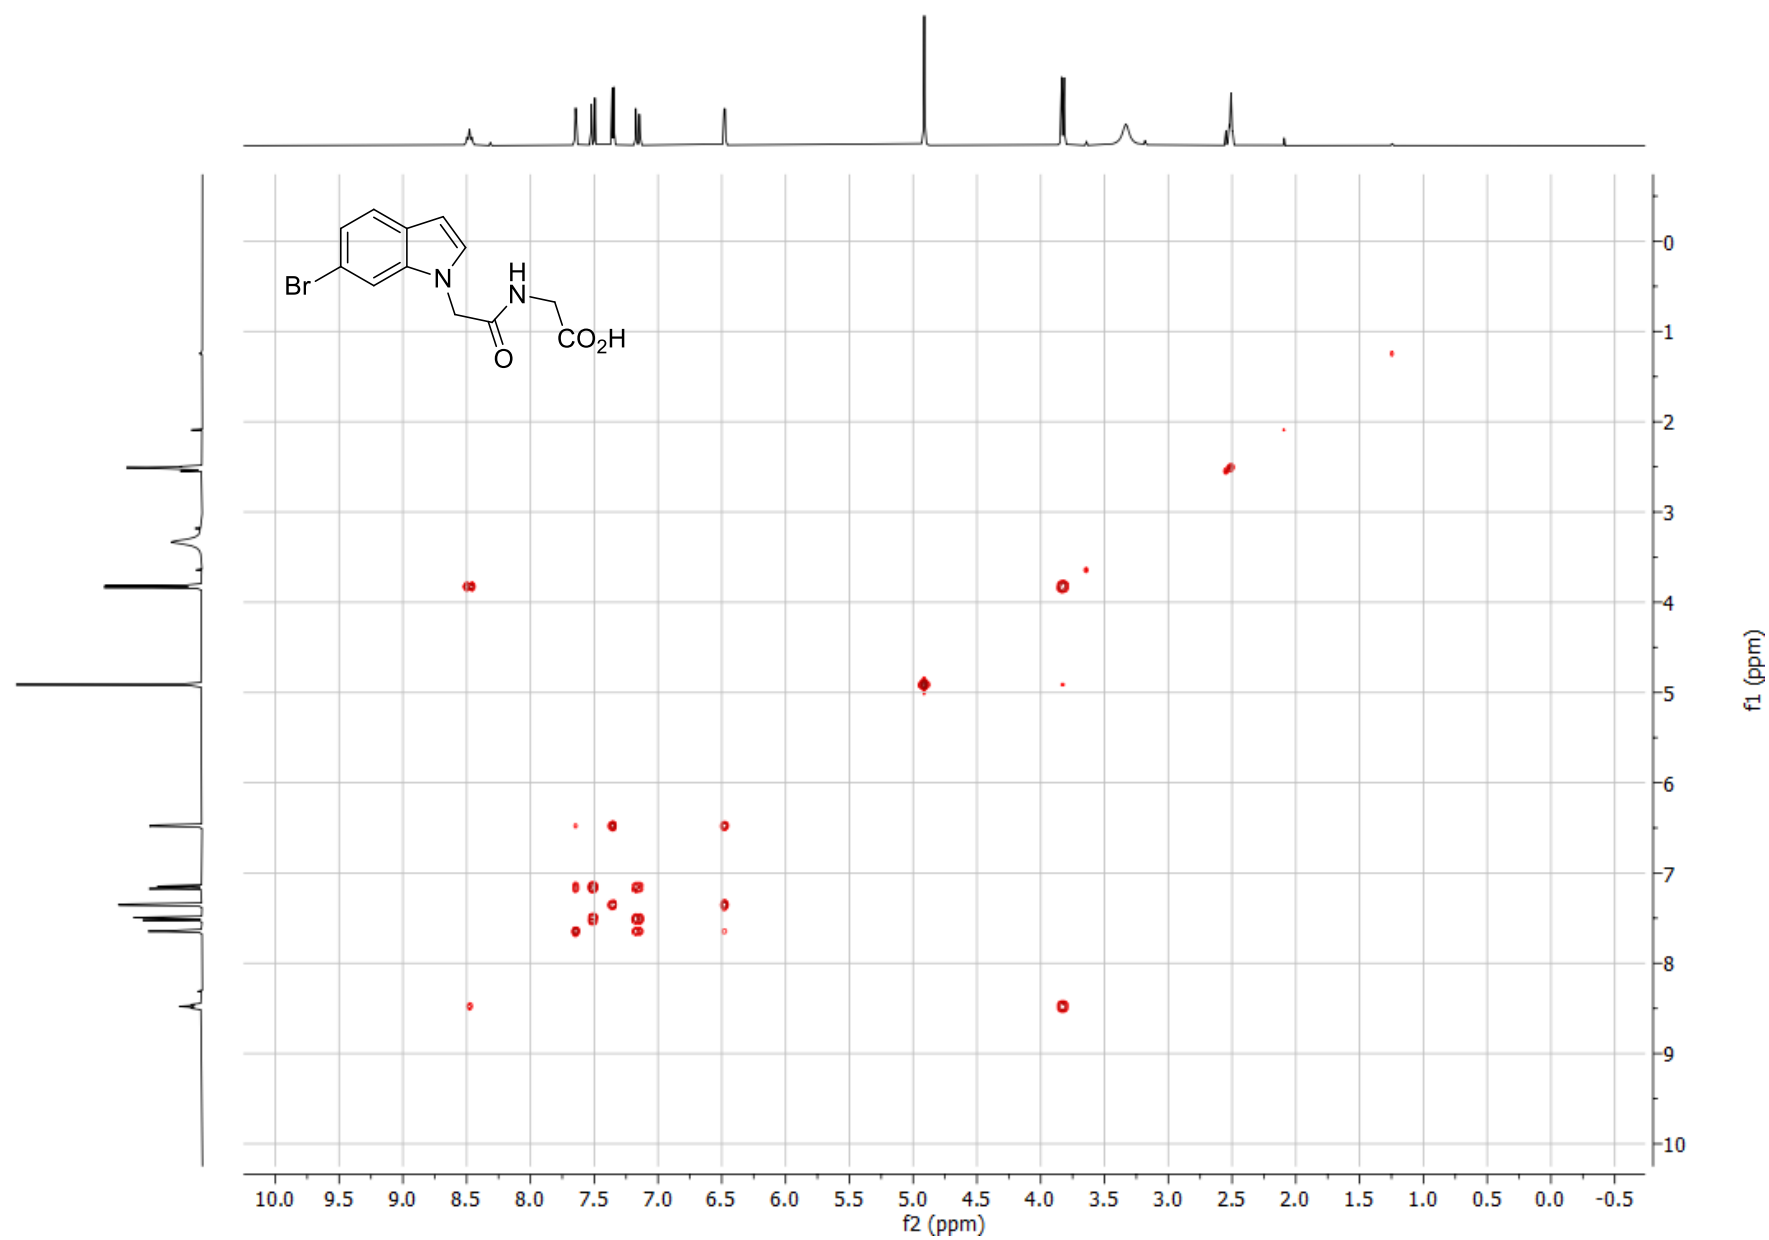

$^1\text{H}, ^{13}\text{C}$ -HSQC (400 & 101 MHz) in  $\text{CDCl}_3$

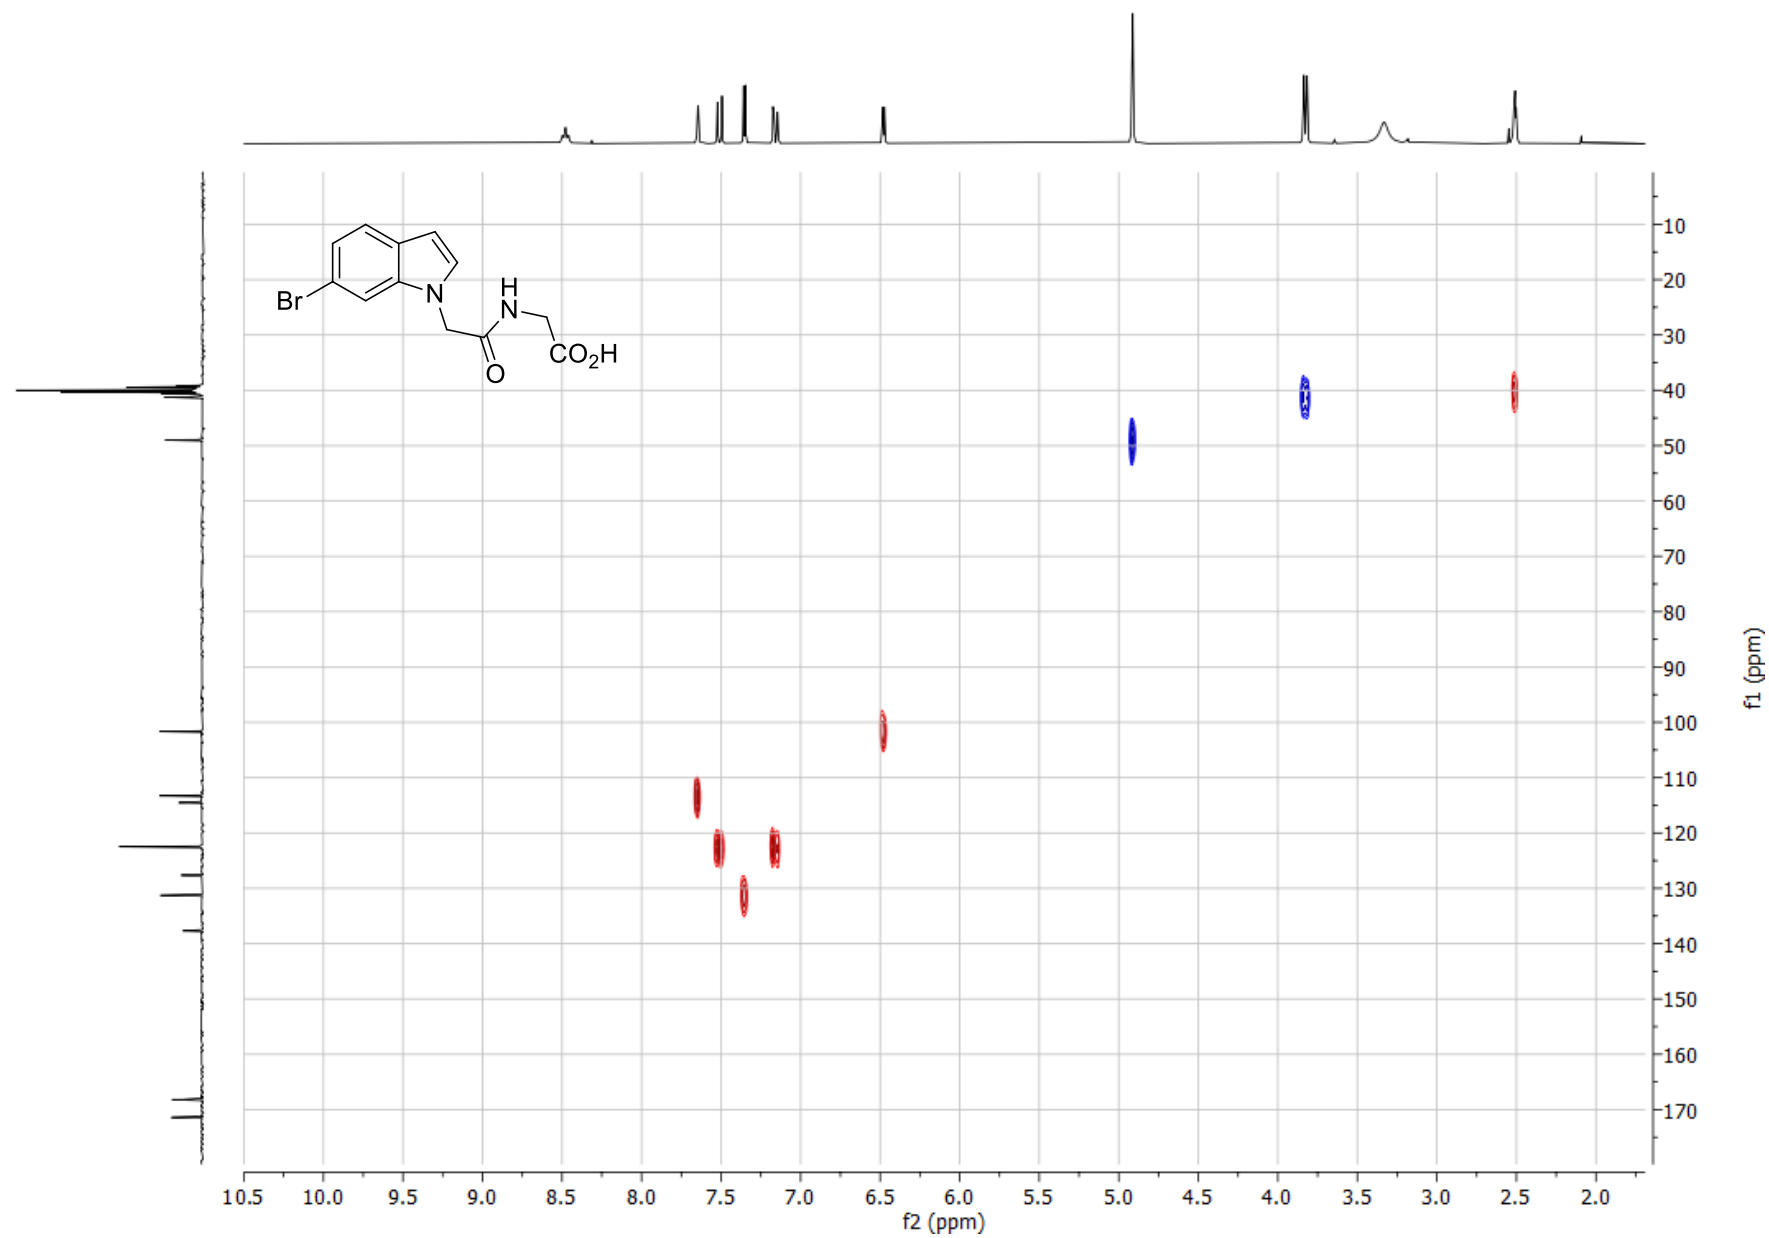

$^1\text{H}$ ,  $^{13}\text{C}$ -HMBC (400 & 101 MHz) in  $\text{CDCl}_3$

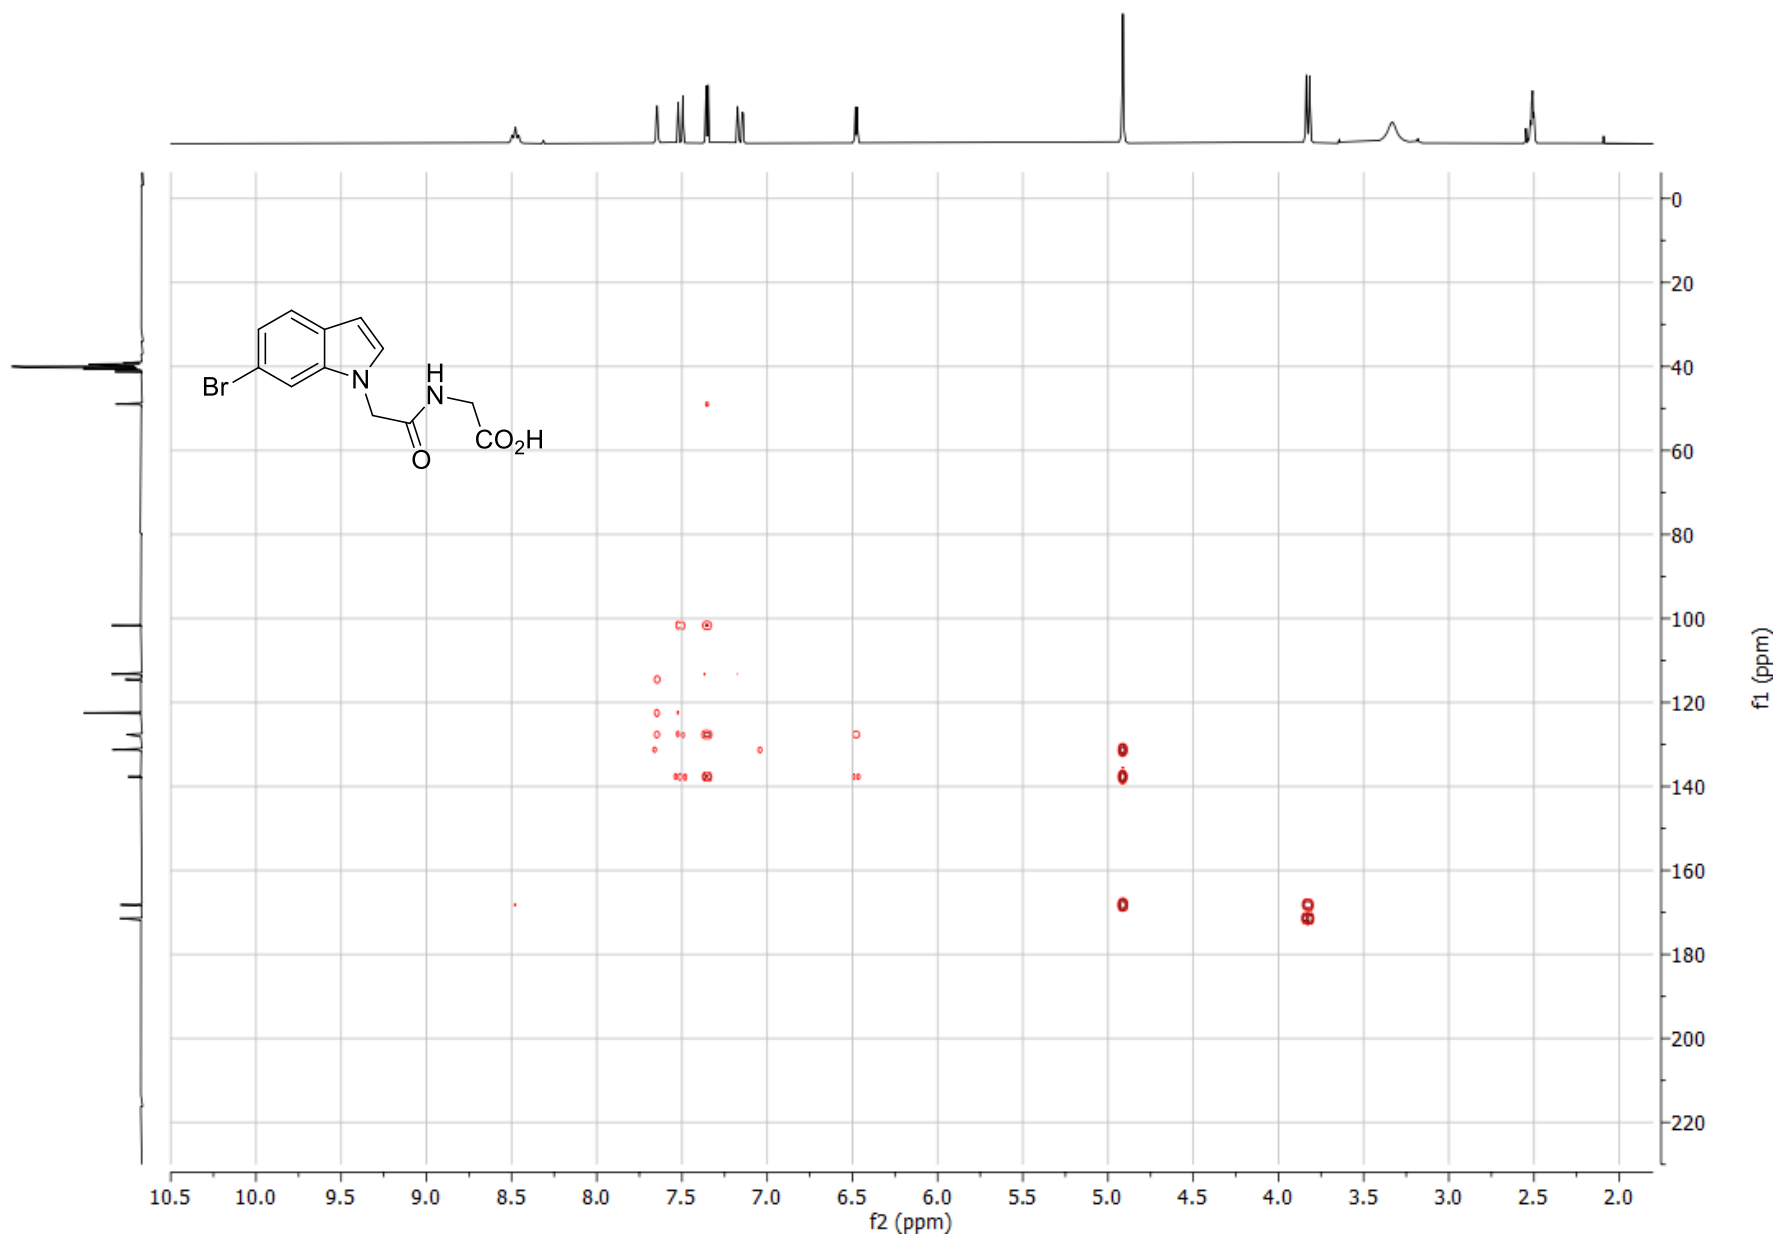

$^1\text{H}$  NMR (300 MHz) in  $\text{CDCl}_3$

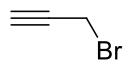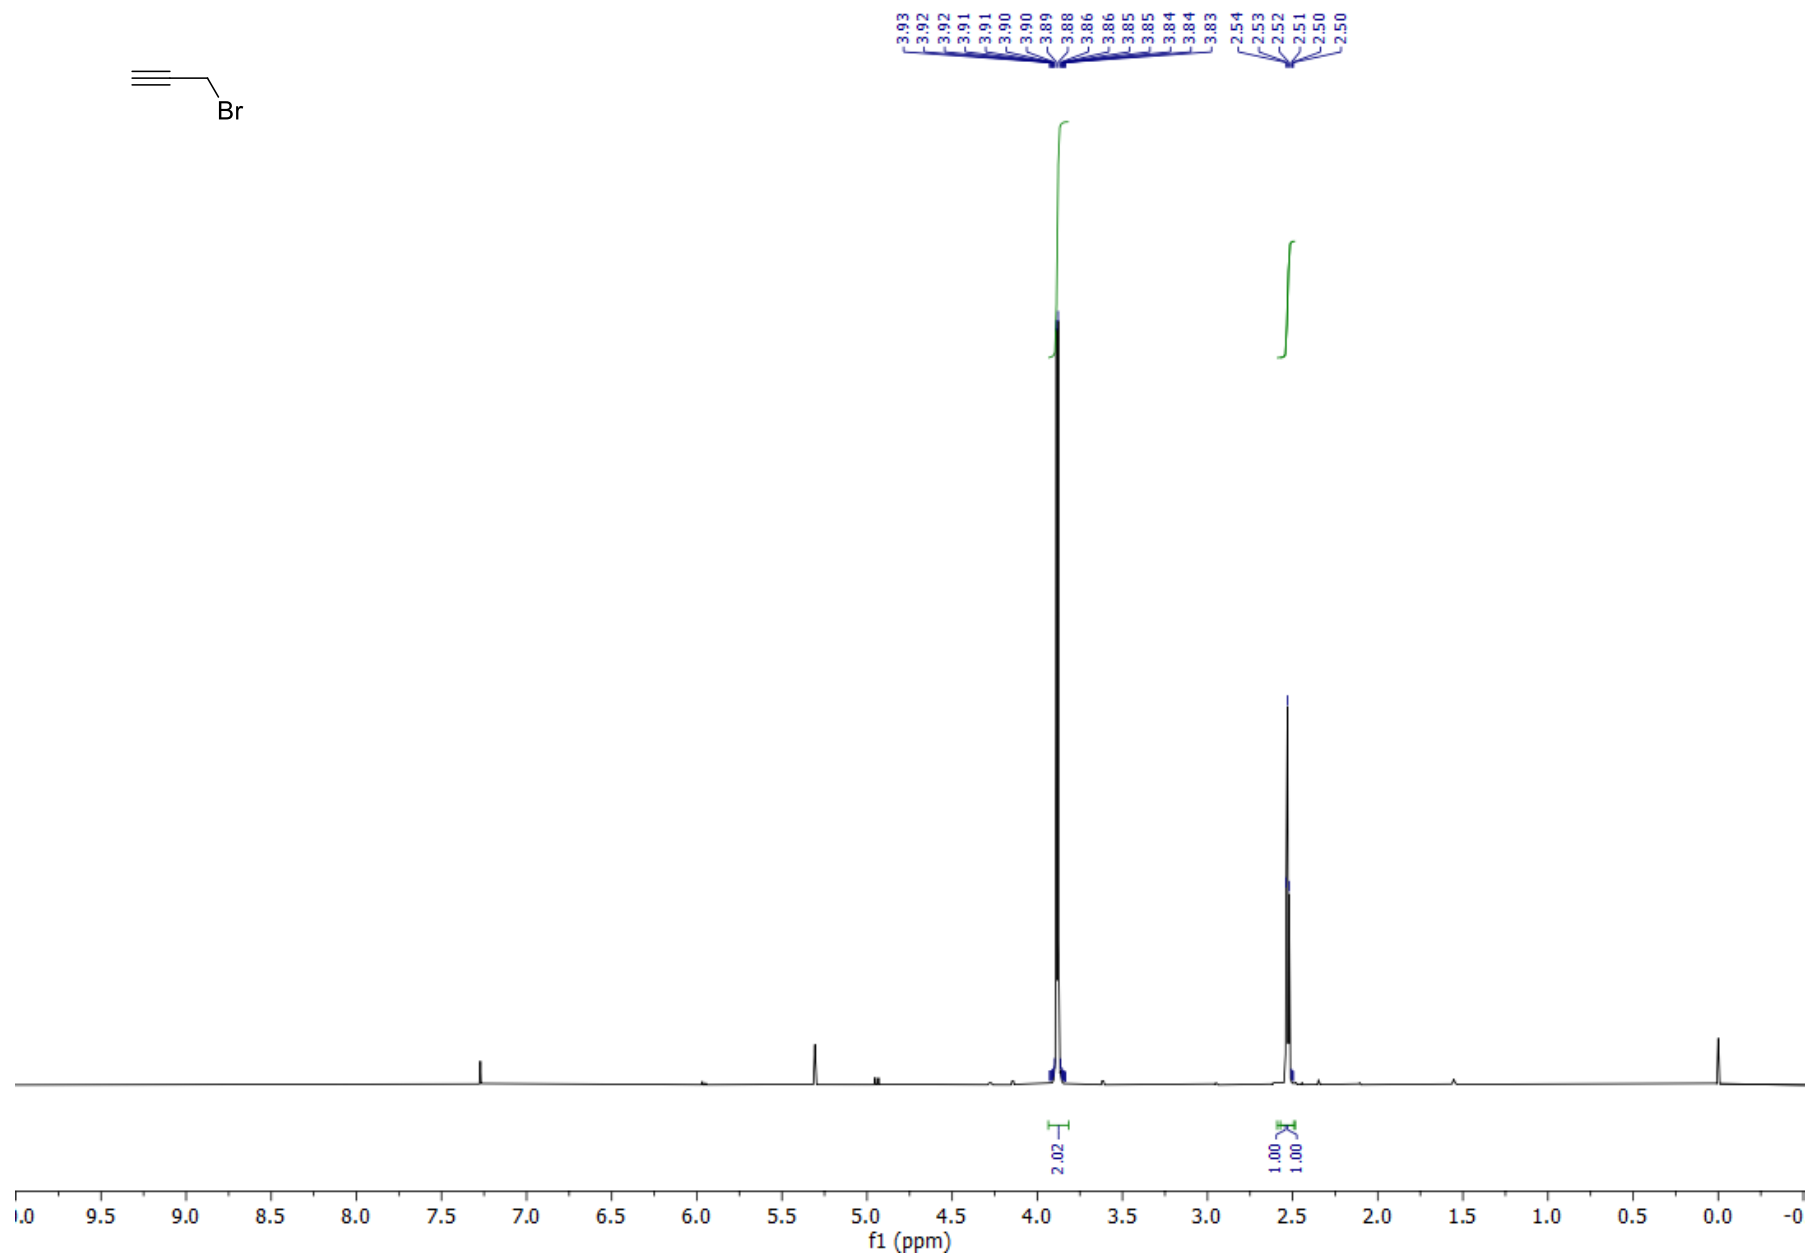



$^1\text{H}$  NMR (300 MHz) in  $\text{CDCl}_3$

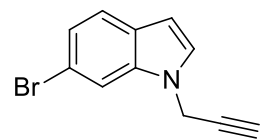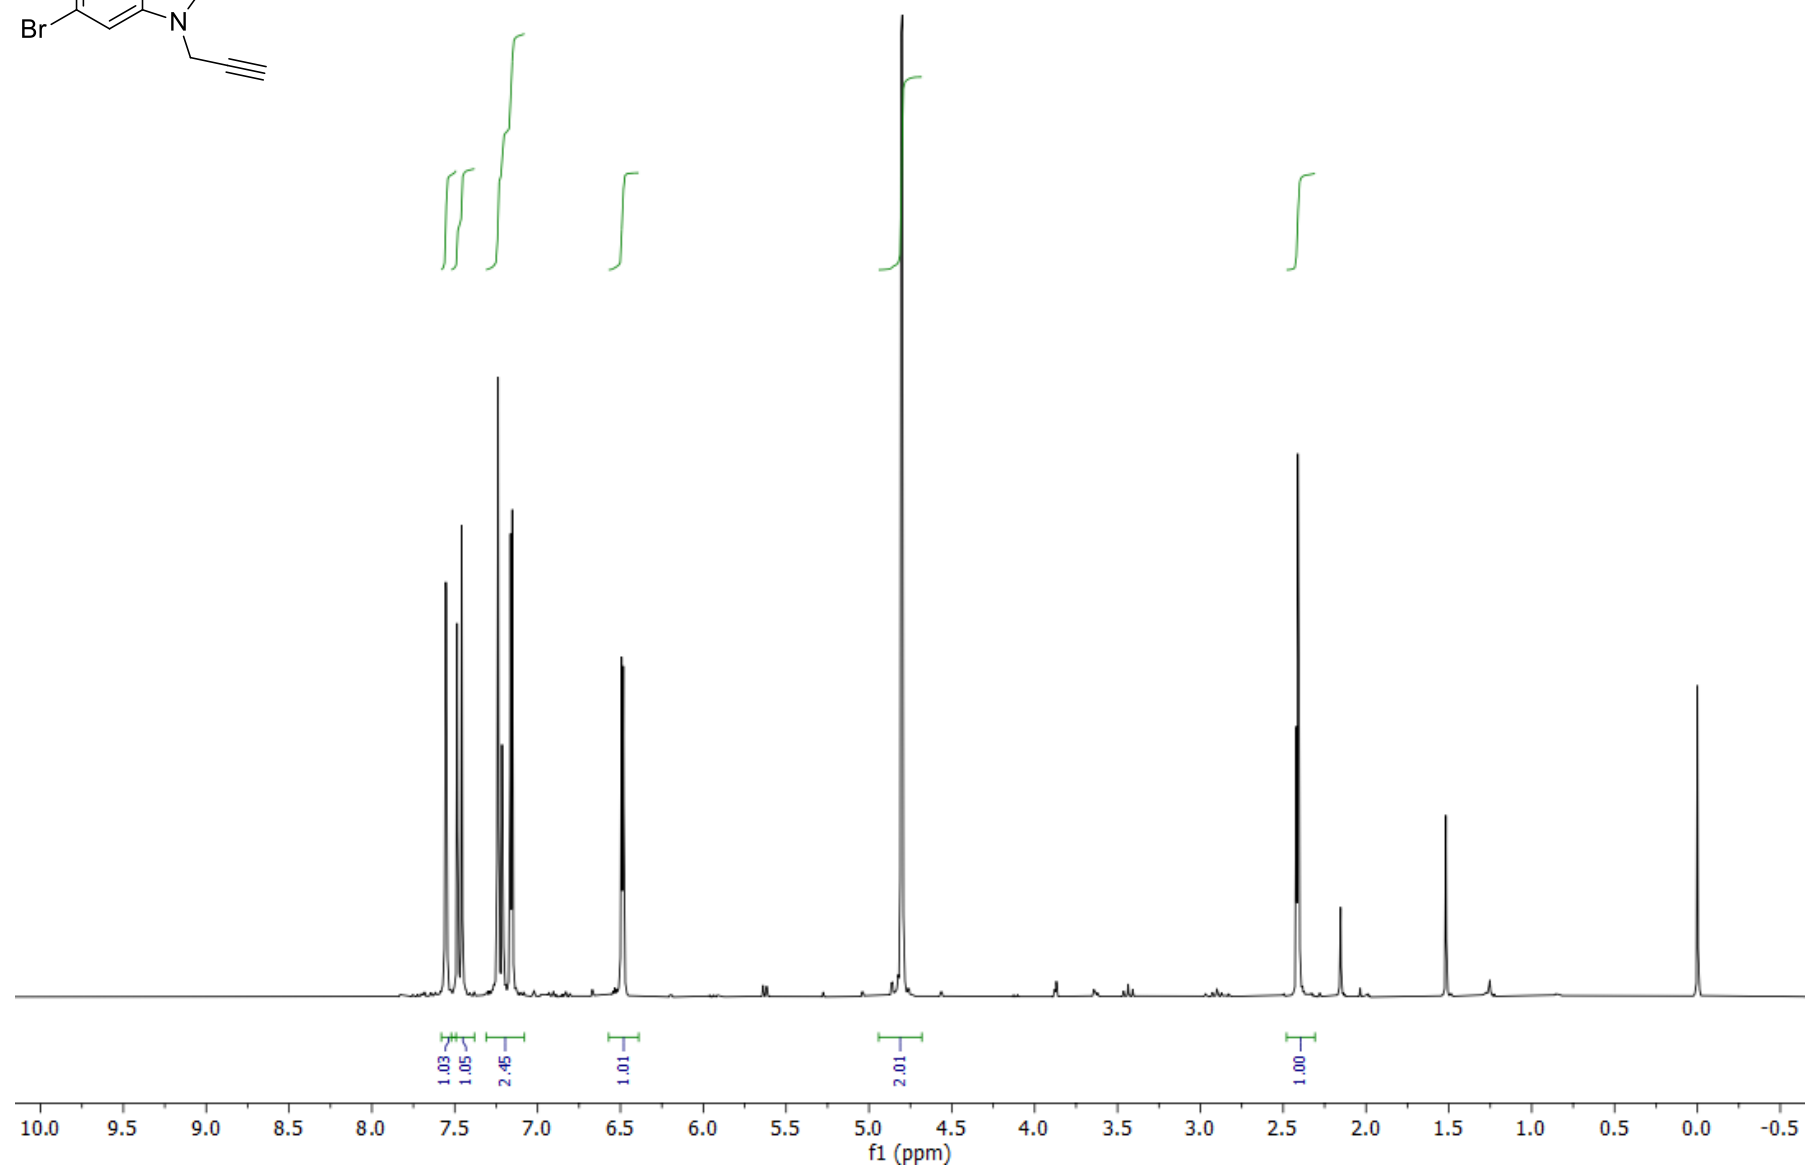

$^{13}\text{C}$  NMR (75 MHz) in  $\text{CDCl}_3$

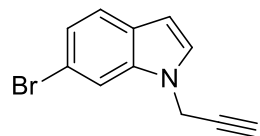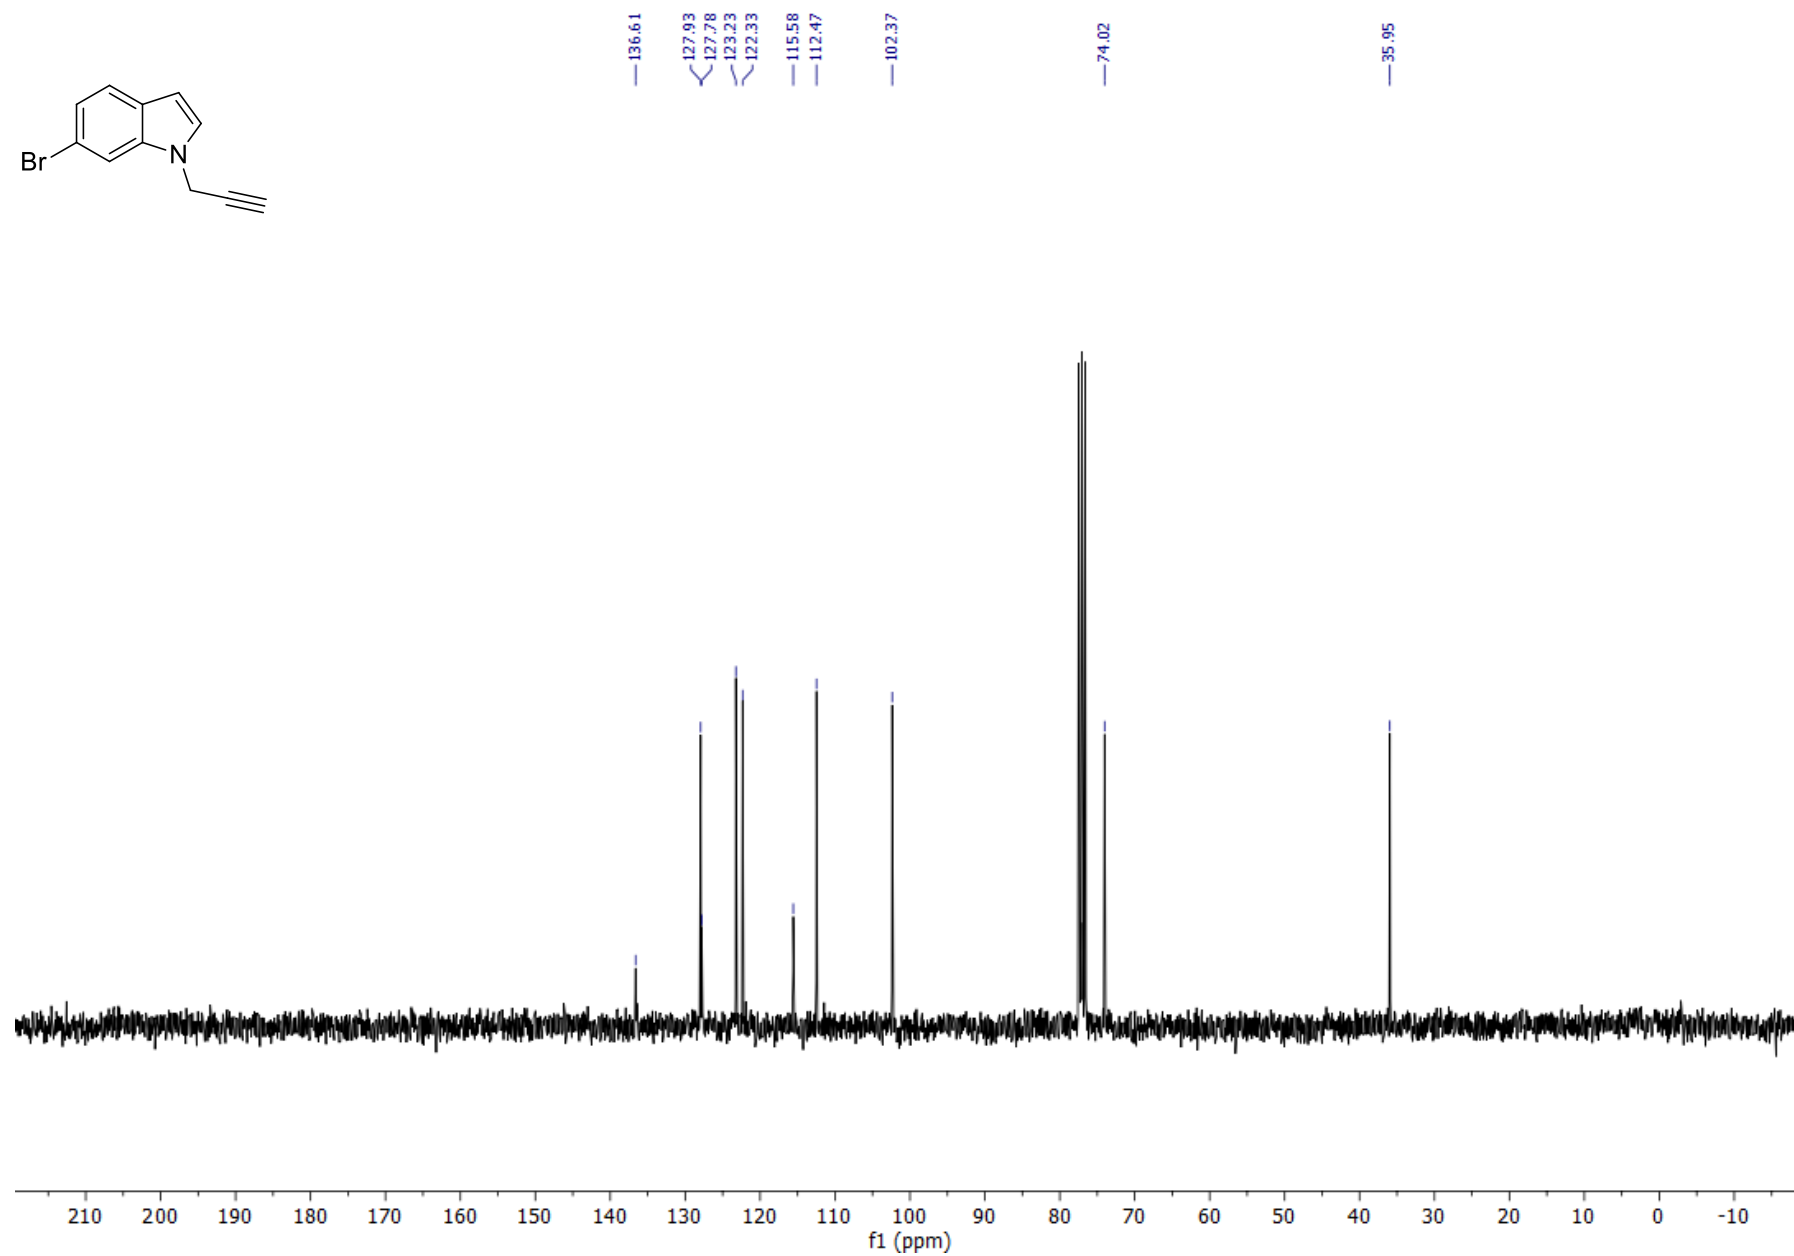

$^1\text{H}$  NMR (300 MHz) in  $\text{CDCl}_3$

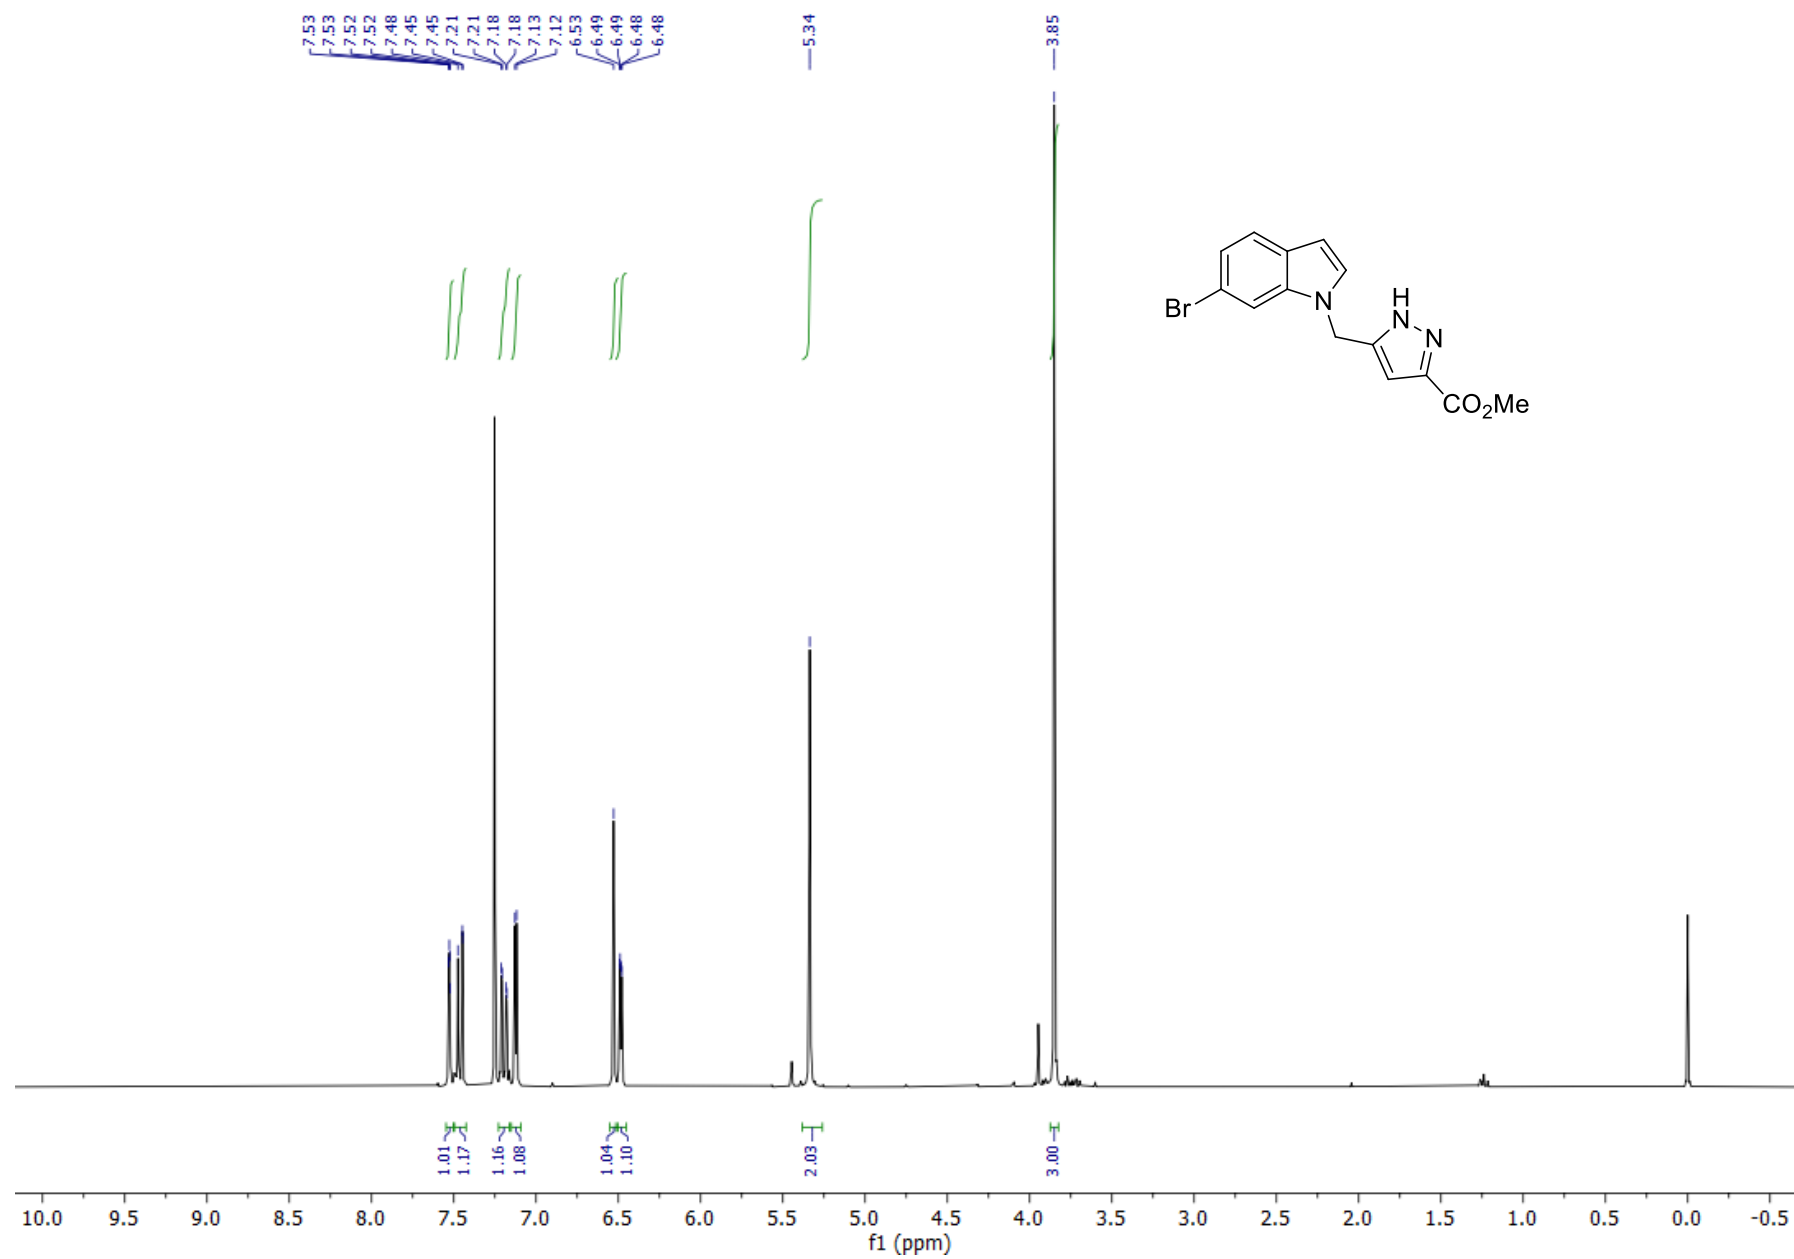

$^{13}\text{C}$  NMR (75 MHz) in  $\text{CDCl}_3$

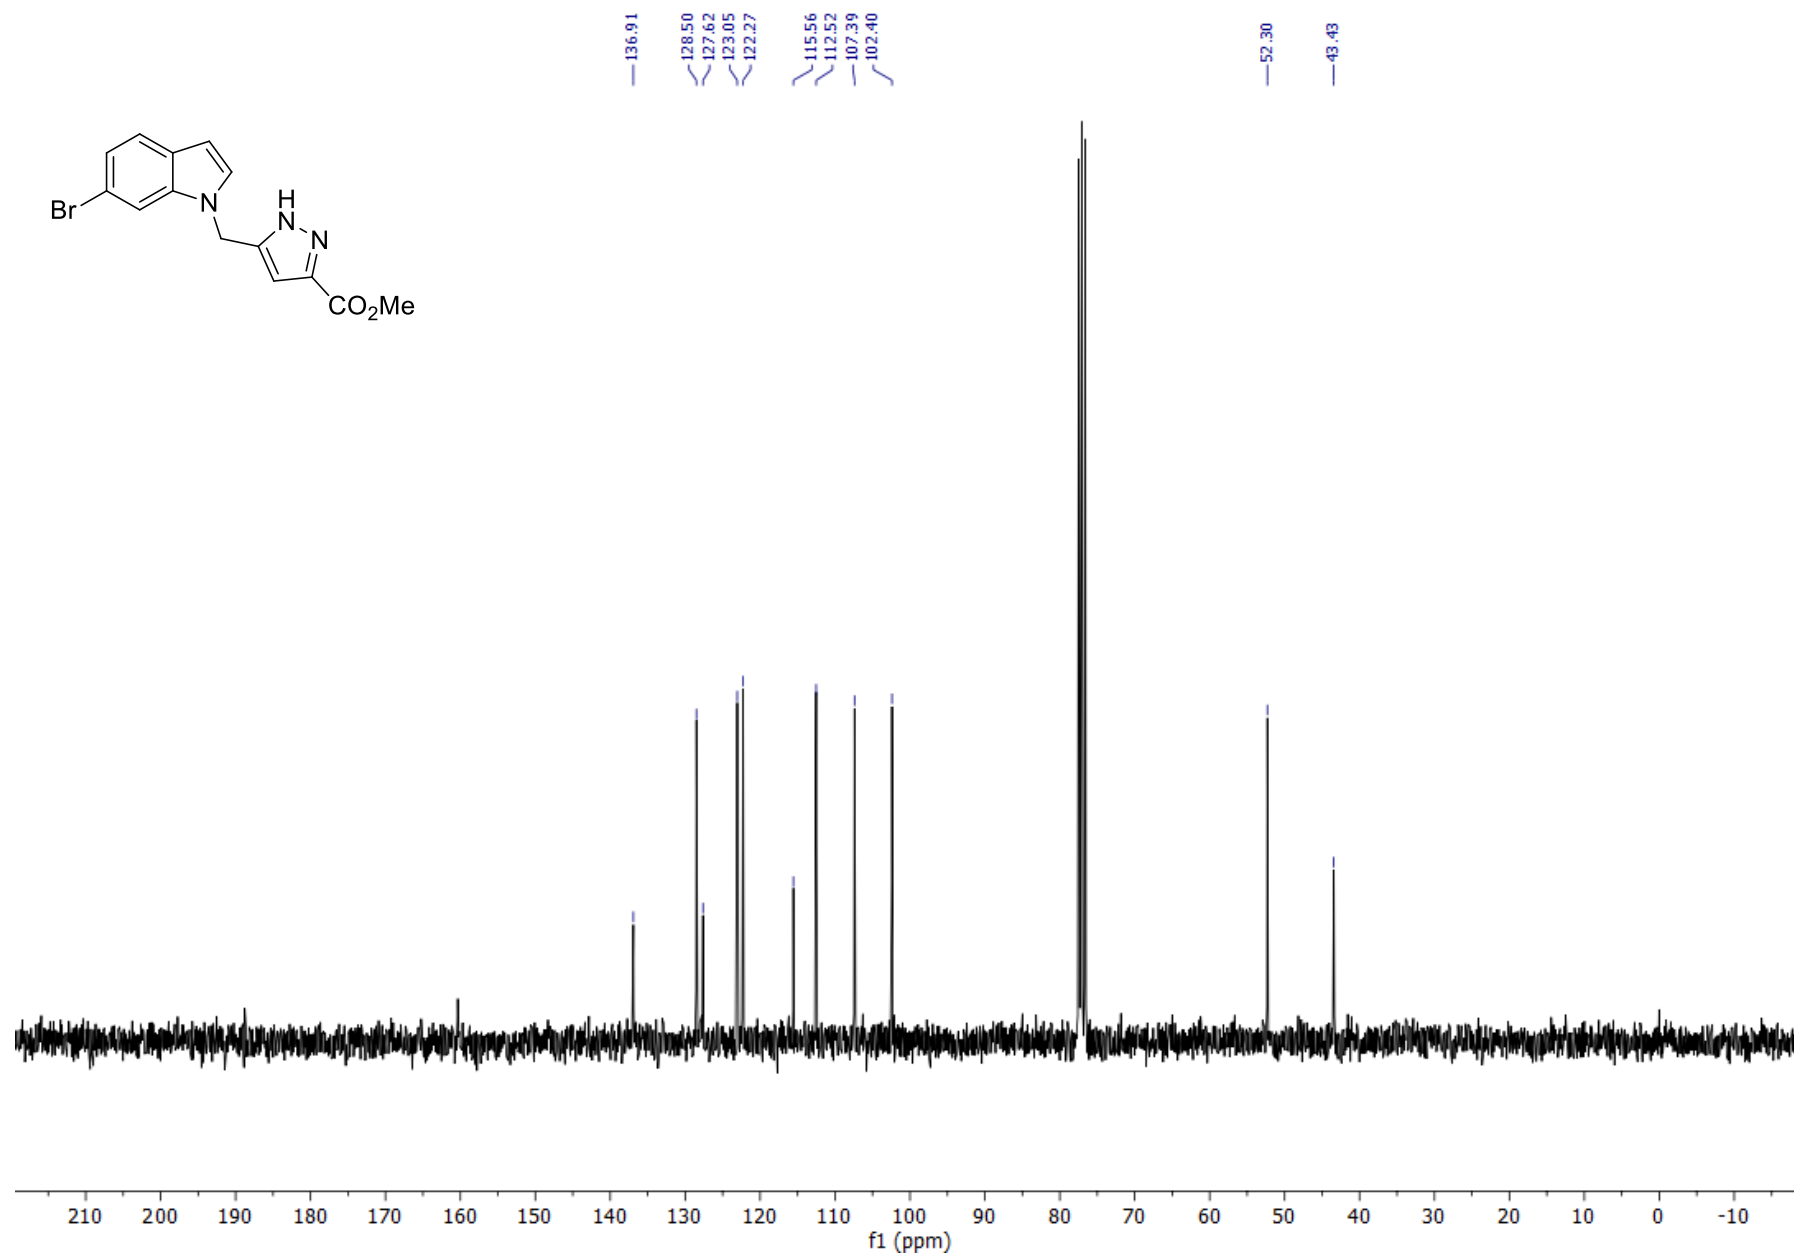

$^1\text{H}$  NMR (300 MHz) in DMSO- $d_6$

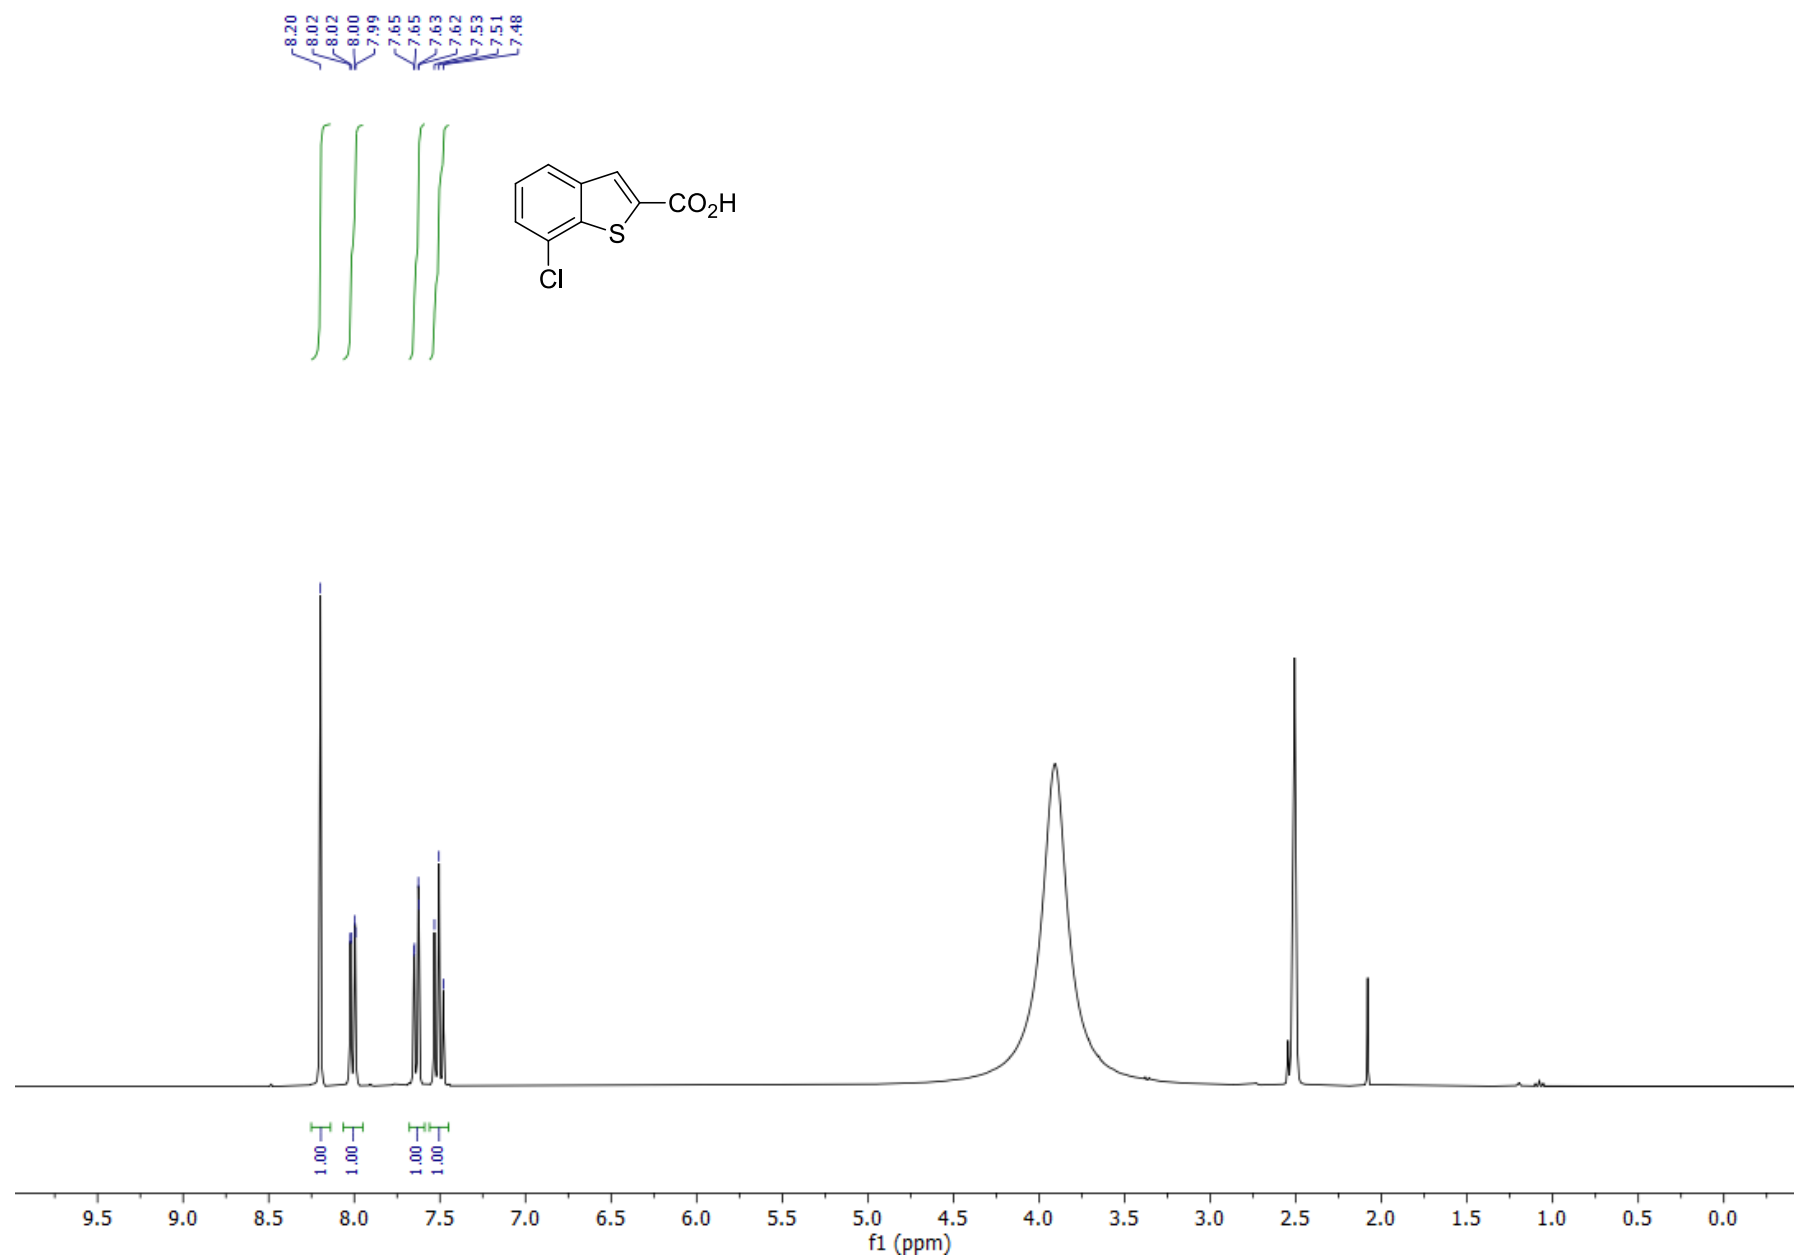

$^{13}\text{C}$  NMR (75 MHz) in DMSO-d<sub>6</sub>

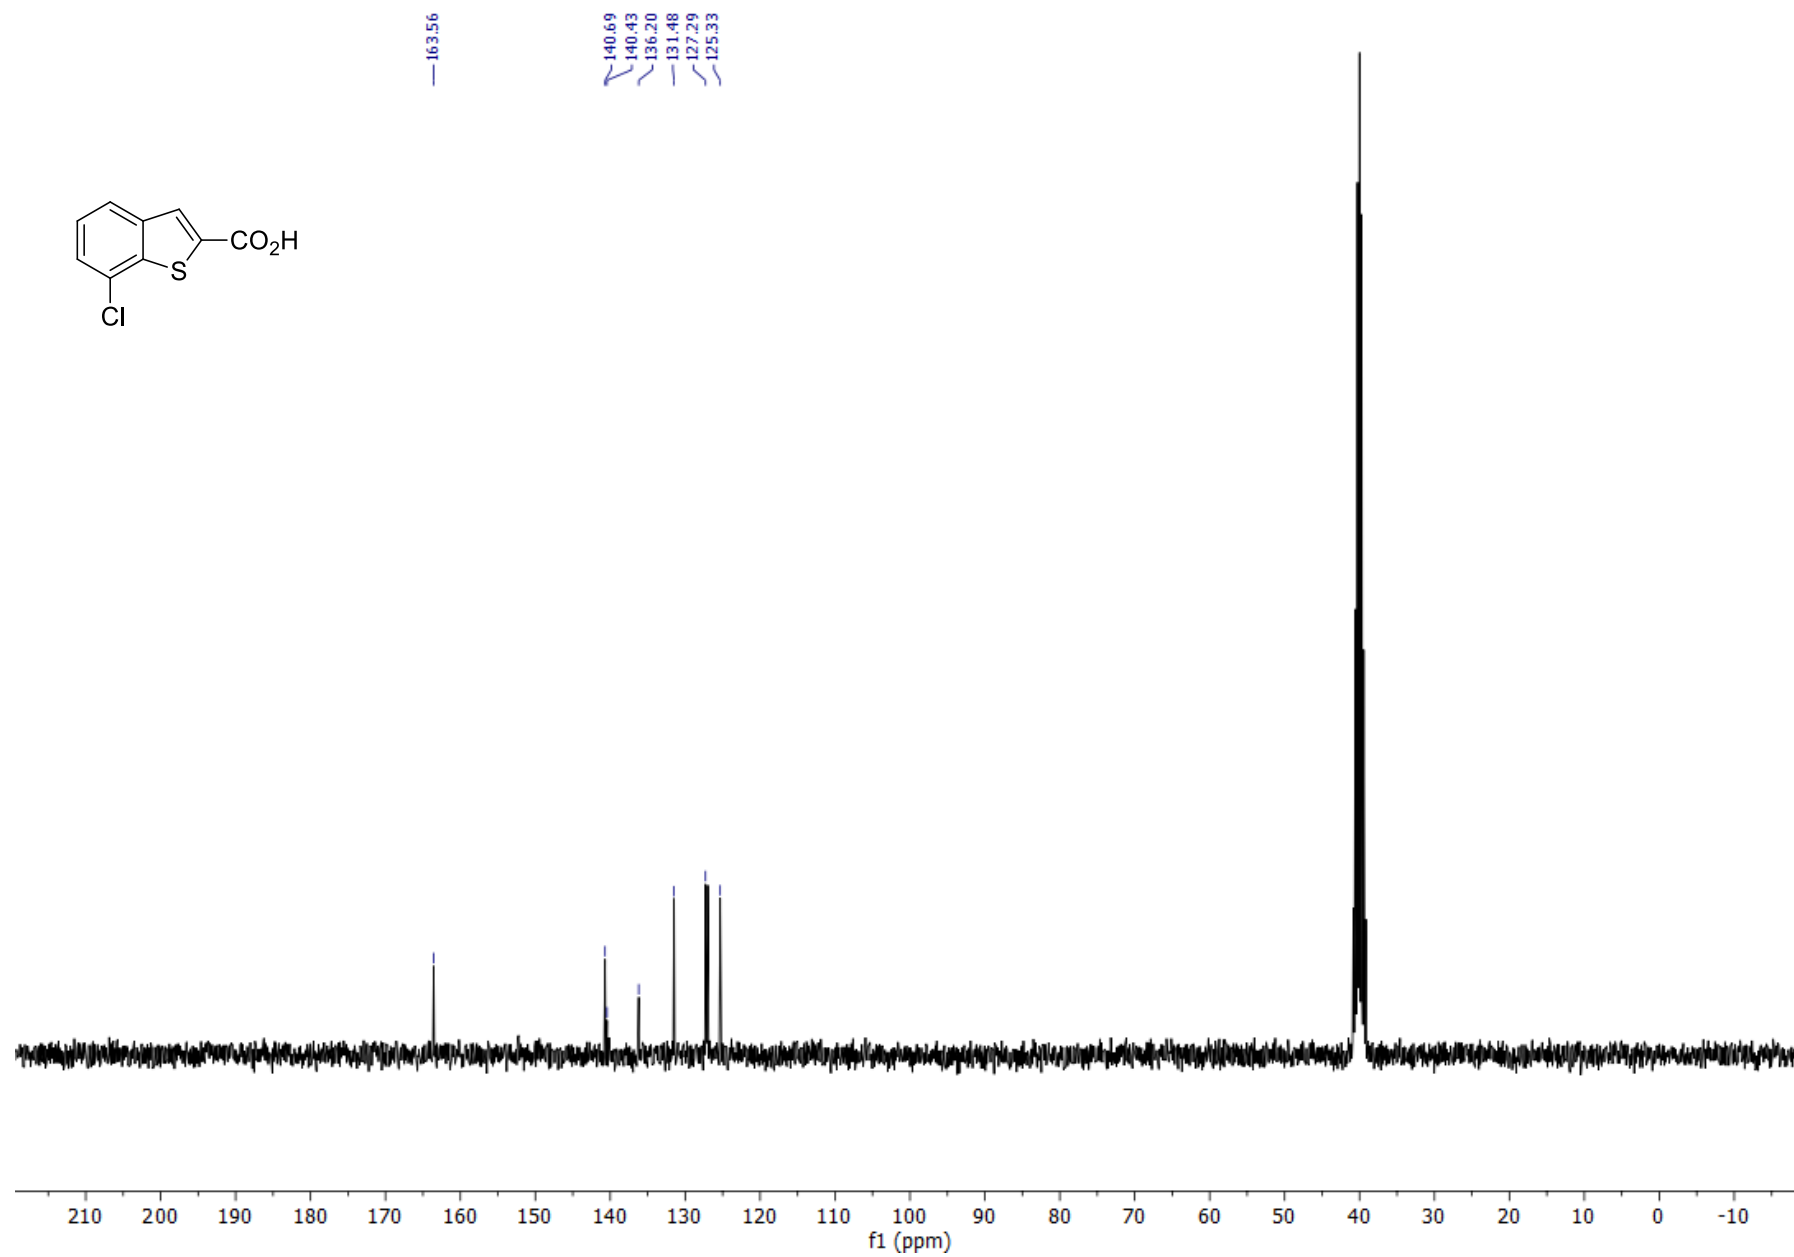

<sup>1</sup>H NMR (300 MHz) in CDCl<sub>3</sub>

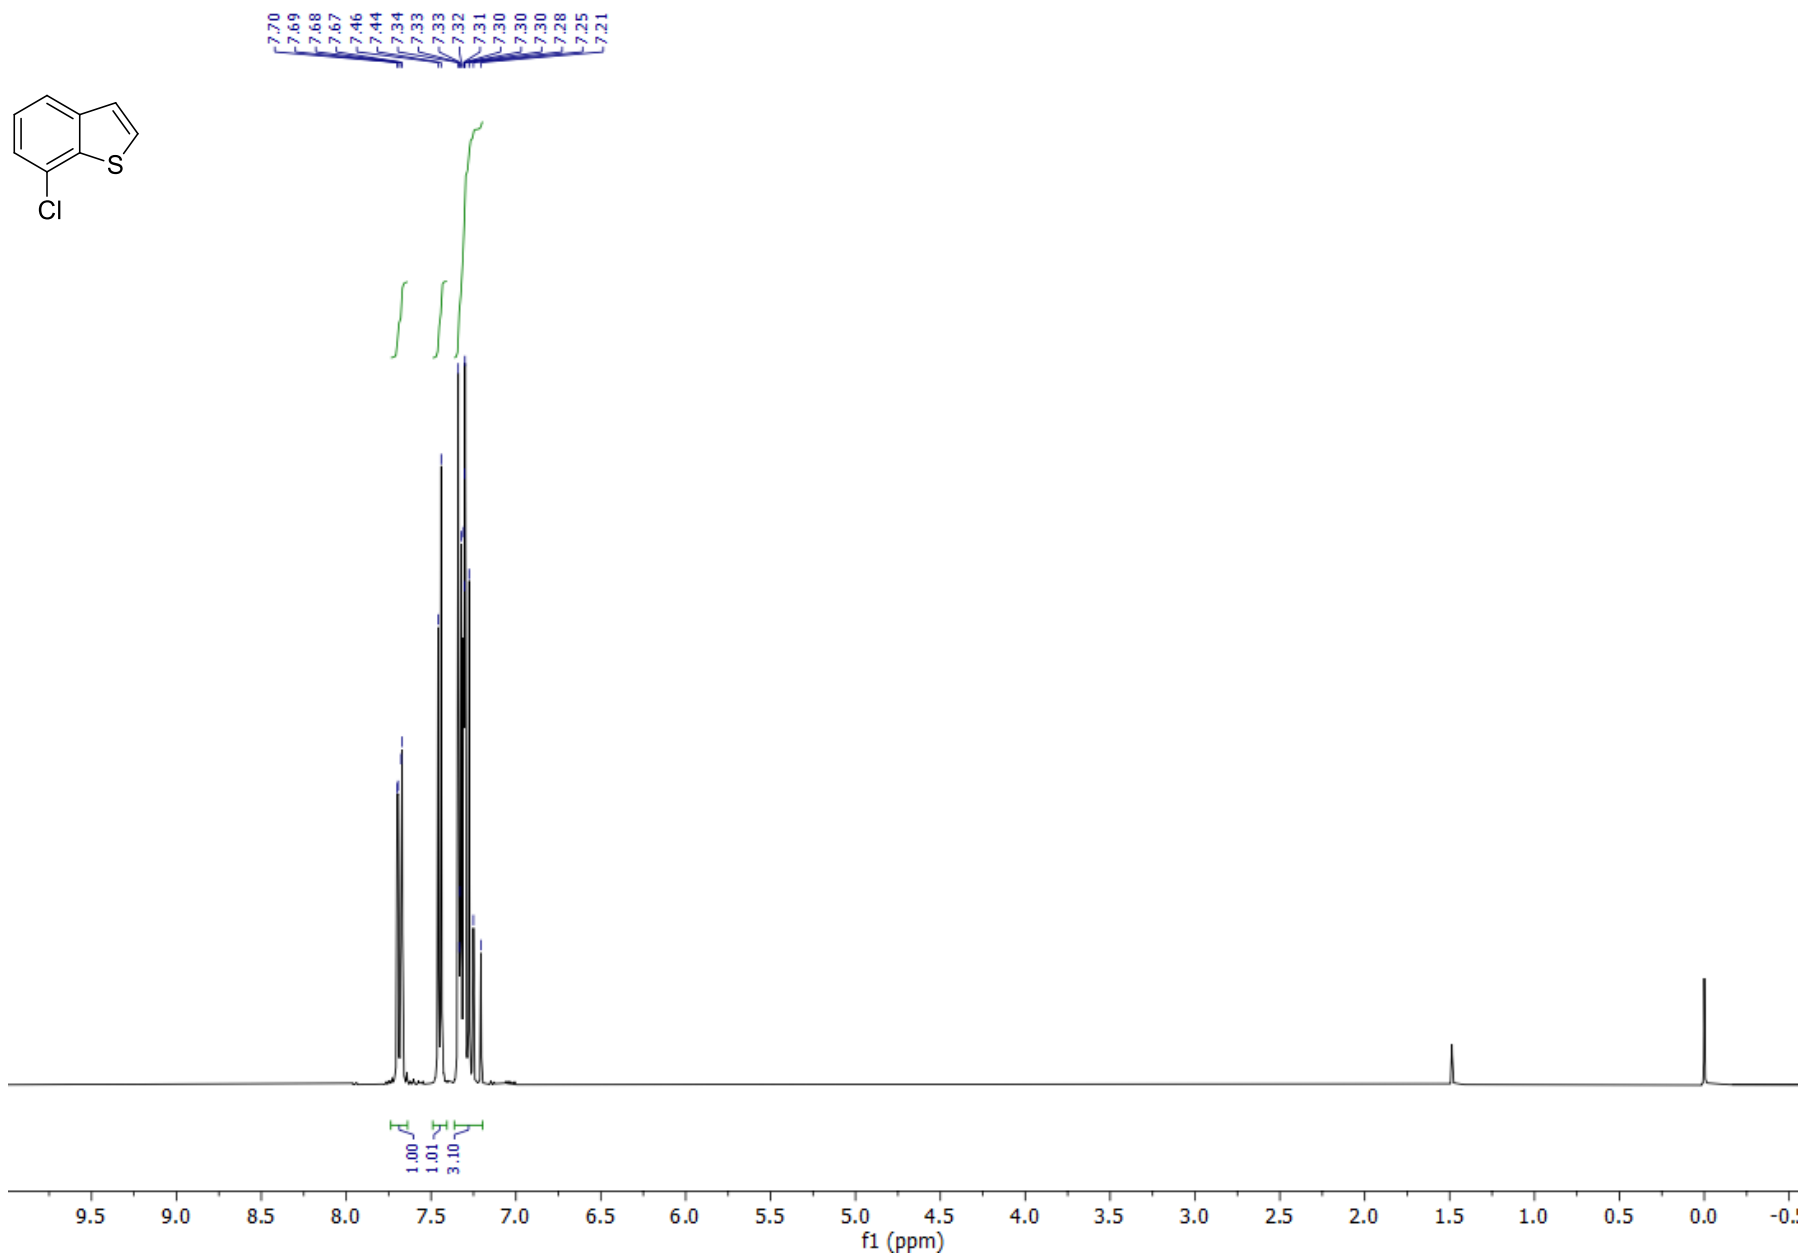

$^{13}\text{C}$  NMR (75 MHz) in  $\text{CDCl}_3$

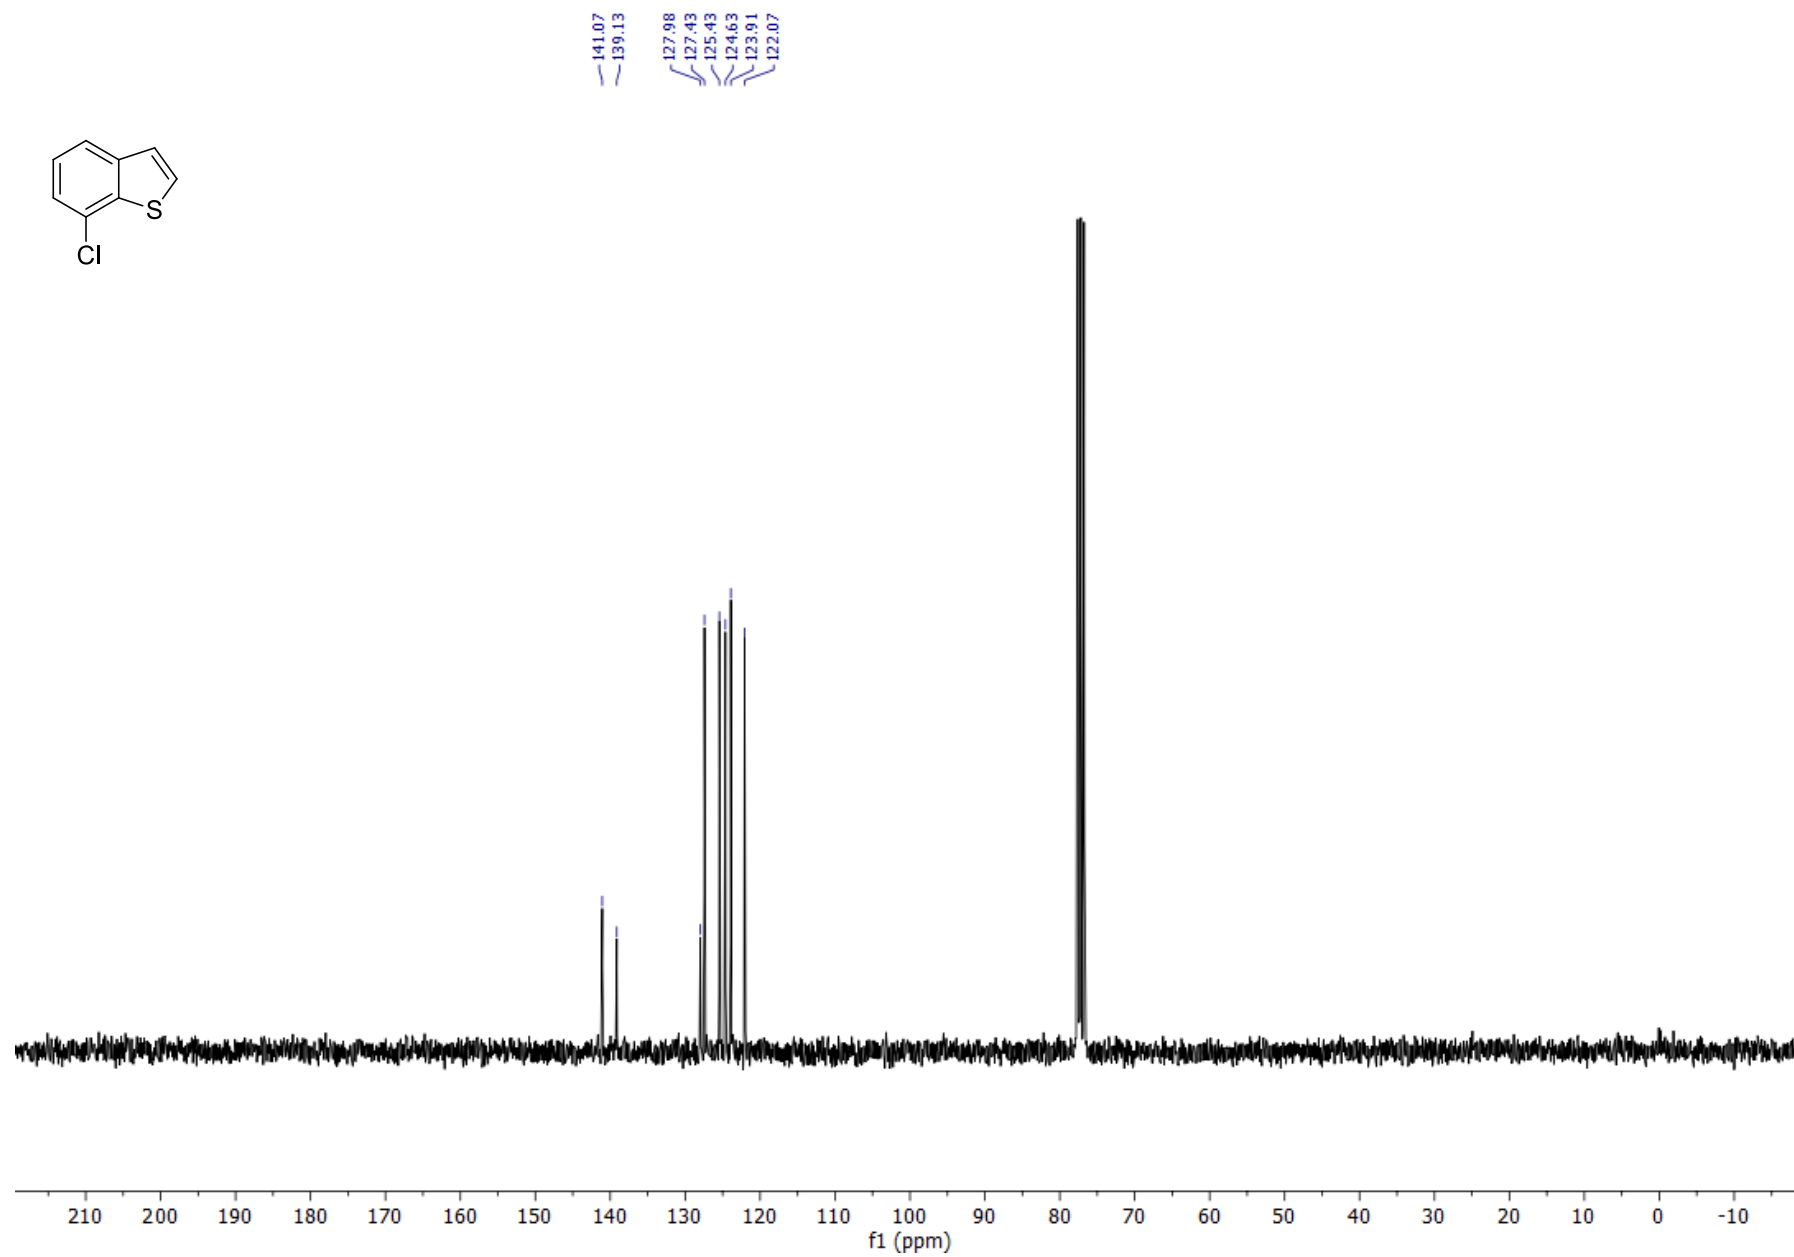



$^1\text{H}$  NMR (300 MHz) in DMSO- $d_6$

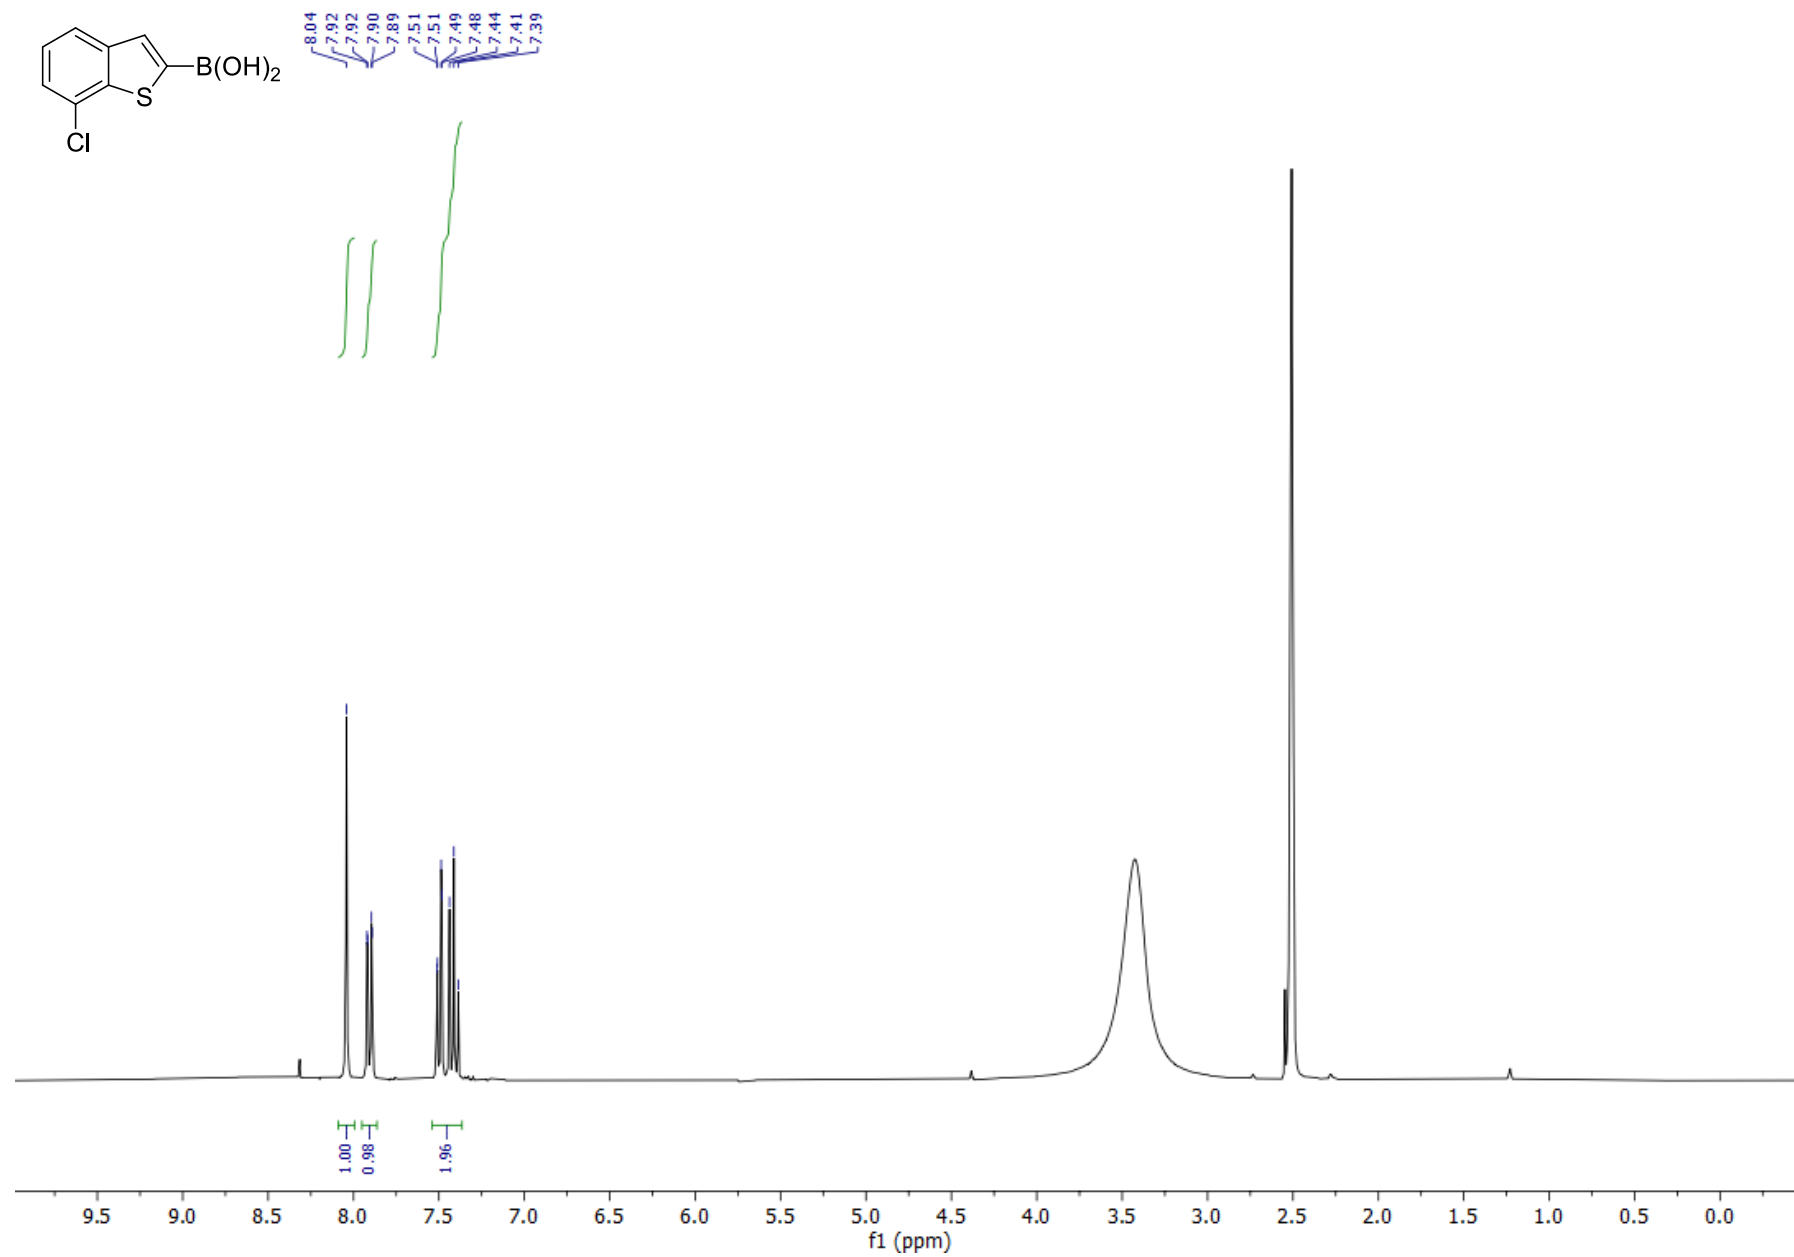

$^1\text{H}$  NMR (300 MHz) in DMSO- $d_6$

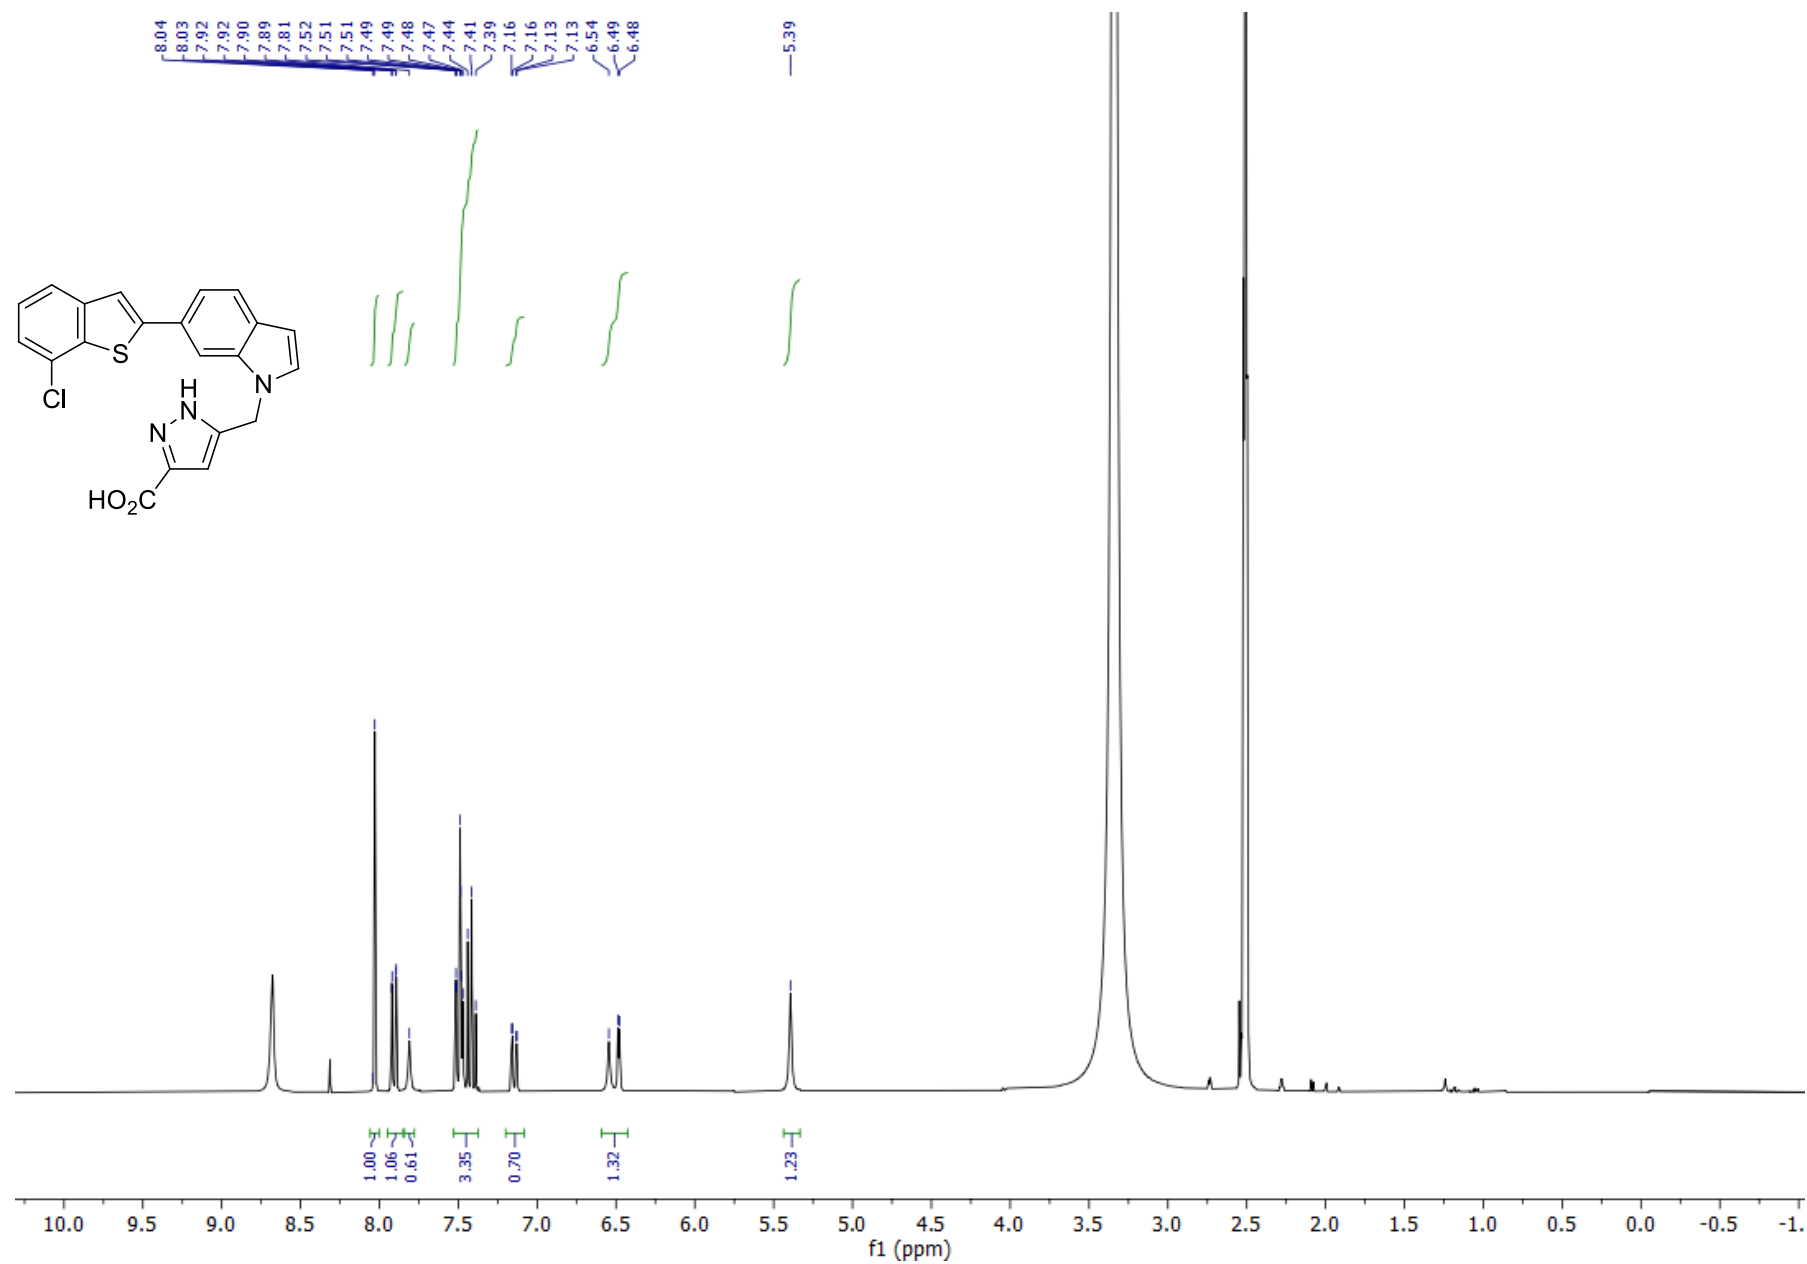

$^{13}\text{C}$  NMR (75 MHz) in DMSO- $d_6$

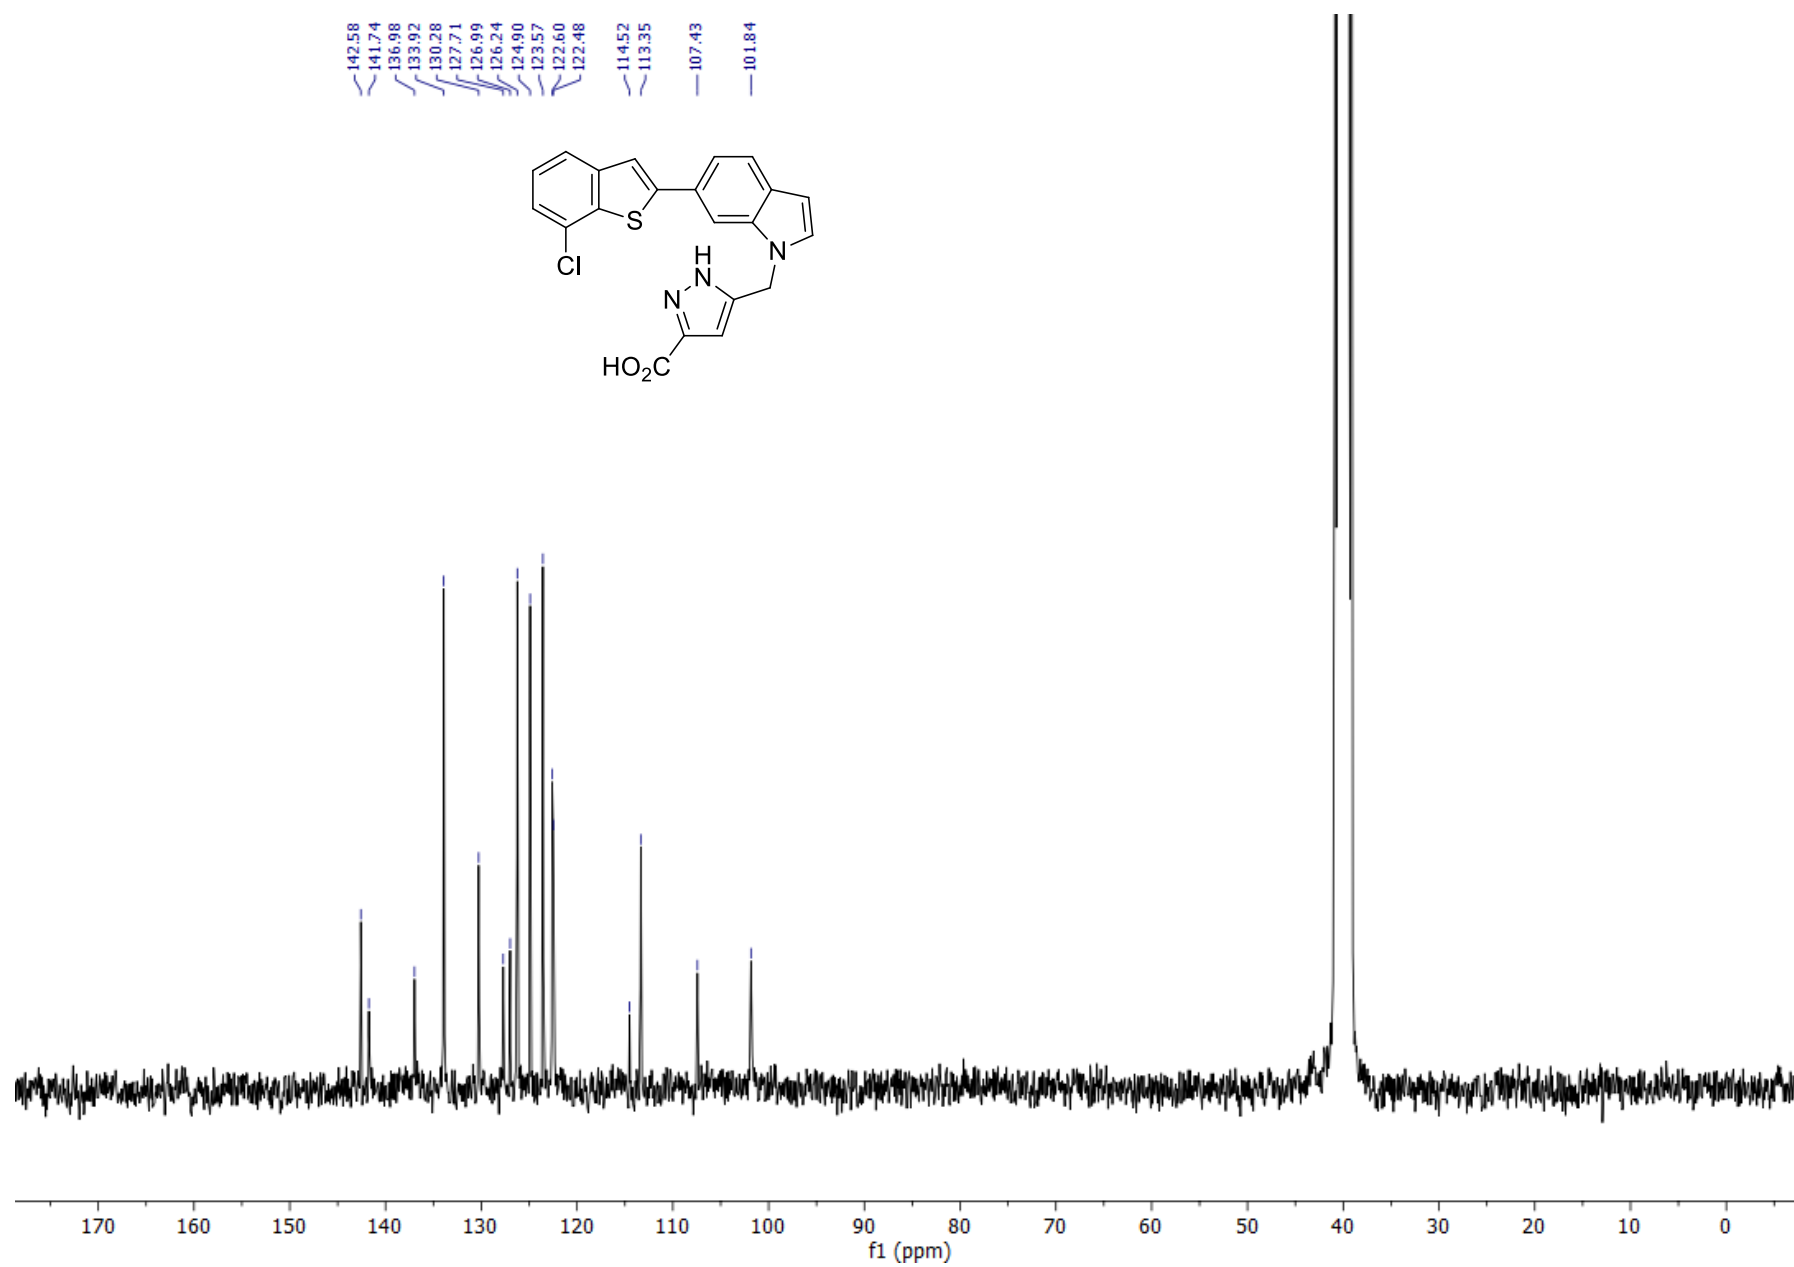

Supplement: s1 [file s1]
